# Supplementary material for: An investigation of perceived vehicle speed from a driver's perspective
Source: PLoS One. 2017 Oct 17;12(10):e0185347. doi: 10.1371/journal.pone.0185347 (PMC5644980; doi:10.1371/journal.pone.0185347)
Supplement: S1 File — (XLSX) [file pone.0185347.s001.xlsx]

## Sheet: Sheet1
Subject_ID	Gender	Driving_experience	Driving_years	Video_ID	RoadType	ImageScale	TrueSpeed	EstimatedSpeed
0043er	female	y	52	.\clips\06.5 wr(05.5_08.1)083227-Clip1674_1.avi	wr	0.38	6.5	6
0043er	female	y	52	.\clips\62.1 nr(61.6_62.3)084019-Clip180_1.avi	nr	1	62.1	38
0043er	female	y	52	.\clips\05.7 wr(04.8_07.4)123137-Clip521_1.avi	wr	0.75	5.7	6
0043er	female	y	52	.\clips\21.1 nr(20.3_21.9)100635-Clip1355_1.avi	nr	0.75	21.1	18
0043er	female	y	52	.\clips\46.2 wr(45.7_46.8)083227-Clip606_1.avi	wr	0.5	46.2	47
0043er	female	y	52	.\clips\20.2 nr(19.4_21.3)110538-Clip1556_1.avi	nr	1	20.2	18
0043er	female	y	52	.\clips\43.0 wr(42.9_43.1)133604-Clip702_1.avi	wr	0.38	43	48
0043er	female	y	52	.\clips\30.4 nr(29.3_31.2)100334-Clip182_1.avi	nr	0.5	30.4	22
0043er	female	y	52	.\clips\61.3 wr(60.9_62.3)100334-Clip590_1.avi	wr	0.75	61.3	54
0043er	female	y	52	.\clips\46.7 nr(46.6_46.8)152855-Clip725_1.avi	nr	0.75	46.7	53
0043er	female	y	52	.\clips\16.7 wr(16.6_16.7)091040-Clip871_1.avi	wr	0.38	16.7	41
0043er	female	y	52	.\clips\32.1 wr(31.2_32.9)085534-Clip820_1.avi	wr	0.75	32.1	33
0043er	female	y	52	.\clips\50.3 nr(49.2_51.0)150252-Clip1226_1.avi	nr	1	50.3	53
0043er	female	y	52	.\clips\23.9 nr(23.3_24.4)132139-Clip503_1.avi	nr	0.5	23.9	38
0043er	female	y	52	.\clips\30.2 nr(29.6_31.2)171711-Clip306_1.avi	nr	1	30.2	31
0043er	female	y	52	.\clips\27.1 nr(26.4_28.2)085534-Clip330_1.avi	nr	0.38	27.1	35
0043er	female	y	52	.\clips\24.8 nr(23.6_26.0)085534-Clip1440_1.avi	nr	0.75	24.8	44
0043er	female	y	52	.\clips\43.1 nr(42.3_43.7)132139-Clip654_1.avi	nr	0.38	43.1	48
0043er	female	y	52	.\clips\13.6 wr(13.4_13.9)085534-Clip1206_1.avi	wr	0.5	13.6	16
0043er	female	y	52	.\clips\64.2 wr(63.1_64.8)153252-Clip211_1.avi	wr	0.5	64.2	54
0043er	female	y	52	.\clips\37.1 nr(36.9_37.3)152855-Clip575_1.avi	nr	0.75	37.1	45
0043er	female	y	52	.\clips\57.5 nr(57.1_58.0)120137-Clip335_1.avi	nr	0.38	57.5	53
0043er	female	y	52	.\clips\56.7 wr(55.7_57.3)153252-Clip16_1.avi	wr	0.75	56.7	52
0043er	female	y	52	.\clips\55.4 nr(54.6_56.4)120137-Clip325_1.avi	nr	1	55.4	51
0043er	female	y	52	.\clips\34.8 wr(34.6_35.3)135139-Clip224_1.avi	wr	0.5	34.8	45
0043er	female	y	52	.\clips\05.4 nr(04.7_06.1)103635-Clip535_1.avi	nr	1	5.4	16
0043er	female	y	52	.\clips\38.0 nr(37.3_39.0)135139-Clip366_1.avi	nr	0.38	38	54
0043er	female	y	52	.\clips\20.4 wr(19.4_20.9)083227-Clip835_1.avi	wr	1	20.4	24
0043er	female	y	52	.\clips\60.6 wr(60.4_60.7)083227-Clip649_1.avi	wr	0.5	60.6	52
0043er	female	y	52	.\clips\29.5 nr(29.4_29.6)085534-Clip146_1.avi	nr	0.75	29.5	23
0043er	female	y	52	.\clips\59.7 wr(59.6_60.0)084019-Clip115_1.avi	wr	0.75	59.7	55
0043er	female	y	52	.\clips\63.2 wr(63.0_63.4)084019-Clip250_1.avi	wr	0.38	63.2	53
0043er	female	y	52	.\clips\10.9 wr(10.4_11.5)091040-Clip1582_1.avi	wr	0.5	10.9	13
0043er	female	y	52	.\clips\36.0 nr(35.3_36.5)132139-Clip720_1.avi	nr	0.5	36	53
0043er	female	y	52	.\clips\27.6 nr(27.1_28.1)085534-Clip325_1.avi	nr	0.38	27.6	36
0043er	female	y	52	.\clips\41.0 nr(40.9_41.2)085700-Clip949_1.avi	nr	0.5	41	45
0043er	female	y	52	.\clips\08.2 nr(07.5_08.7)112540-Clip813_1.avi	nr	1	8.2	17
0043er	female	y	52	.\clips\52.9 wr(52.8_53.0)133604-Clip632_1.avi	wr	1	52.9	55
0043er	female	y	52	.\clips\12.9 wr(12.2_13.2)085534-Clip1211_1.avi	wr	1	12.9	14
0043er	female	y	52	.\clips\05.3 wr(03.9_06.0)123137-Clip456_1.avi	wr	1	5.3	14
0043er	female	y	52	.\clips\20.3 nr(19.9_21.3)091040-Clip98_1.avi	nr	0.5	20.3	20
0043er	female	y	52	.\clips\58.4 nr(58.0_58.9)123137-Clip817_1.avi	nr	1	58.4	64
0043er	female	y	52	.\clips\60.1 nr(60.0_60.2)153252-Clip333_1.avi	nr	1	60.1	65
0043er	female	y	52	.\clips\41.9 nr(41.5_42.3)123137-Clip901_1.avi	nr	0.75	41.9	55
0043er	female	y	52	.\clips\37.5 wr(36.8_38.3)152855-Clip1648_1.avi	wr	0.38	37.5	42
0043er	female	y	52	.\clips\28.6 wr(27.8_29.7)085534-Clip1683_1.avi	wr	1	28.6	34
0043er	female	y	52	.\clips\44.6 wr(44.1_45.2)083227-Clip601_1.avi	wr	0.75	44.6	51
0043er	female	y	52	.\clips\13.9 nr(13.1_14.6)105713-Clip1229_1.avi	nr	1	13.9	24
0043er	female	y	52	.\clips\22.9 nr(22.1_23.8)085700-Clip395_1.avi	nr	0.38	22.9	33
0043er	female	y	52	.\clips\11.7 nr(11.2_11.8)105713-Clip158_1.avi	nr	0.38	11.7	9
0043er	female	y	52	.\clips\10.8 wr(09.9_11.8)083227-Clip1336_1.avi	wr	1	10.8	16
0043er	female	y	52	.\clips\59.3 nr(57.9_60.6)085700-Clip892_1.avi	nr	0.5	59.3	59
0043er	female	y	52	.\clips\32.3 nr(32.1_32.3)085534-Clip1305_1.avi	nr	0.38	32.3	43
0043er	female	y	52	.\clips\27.5 wr(26.6_28.5)152855-Clip1626_1.avi	wr	0.38	27.5	52
0043er	female	y	52	.\clips\62.7 nr(62.6_62.7)150252-Clip1183_1.avi	nr	0.5	62.7	63
0043er	female	y	52	.\clips\14.3 nr(13.7_15.0)085534-Clip62_1.avi	nr	0.75	14.3	19
0043er	female	y	52	.\clips\10.1 nr(09.2_11.6)152855-Clip352_1.avi	nr	1	10.1	16
0043er	female	y	52	.\clips\13.8 nr(13.3_14.3)083227-Clip367_1.avi	nr	0.38	13.8	19
0043er	female	y	52	.\clips\55.0 wr(54.9_55.2)085534-Clip514_1.avi	wr	1	55	49
0043er	female	y	52	.\clips\43.4 nr(43.3_43.5)132139-Clip575_1.avi	nr	1	43.4	46
0043er	female	y	52	.\clips\46.7 nr(45.7_47.5)123137-Clip913_1.avi	nr	0.5	46.7	60
0043er	female	y	52	.\clips\29.7 wr(29.4_30.0)152855-Clip1053_1.avi	wr	0.75	29.7	40
0043er	female	y	52	.\clips\38.7 wr(37.9_39.4)152855-Clip1643_1.avi	wr	0.5	38.7	46
0043er	female	y	52	.\clips\39.0 nr(38.9_39.2)135139-Clip341_1.avi	nr	0.5	39	53
0043er	female	y	52	.\clips\58.4 wr(57.6_58.9)153252-Clip21_1.avi	wr	1	58.4	57
0043er	female	y	52	.\clips\18.6 nr(18.1_19.2)110538-Clip1333_1.avi	nr	1	18.6	19
0043er	female	y	52	.\clips\27.2 wr(26.2_27.9)085534-Clip976_1.avi	wr	0.38	27.2	33
0043er	female	y	52	.\clips\16.8 nr(15.8_17.8)100635-Clip1253_1.avi	nr	0.38	16.8	36
0043er	female	y	52	.\clips\59.6 nr(58.6_60.4)120137-Clip340_1.avi	nr	0.75	59.6	54
0043er	female	y	52	.\clips\54.3 nr(53.2_54.7)123137-Clip841_1.avi	nr	0.75	54.3	59
0043er	female	y	52	.\clips\25.0 wr(23.9_25.8)085534-Clip809_1.avi	wr	1	25	29
0043er	female	y	52	.\clips\38.1 wr(38.0_38.3)152855-Clip798_1.avi	wr	1	38.1	48
0043er	female	y	52	.\clips\38.6 nr(37.6_39.2)123137-Clip84_1.avi	nr	1	38.6	47
0043er	female	y	52	.\clips\12.3 wr(11.2_13.1)085534-Clip1099_1.avi	wr	0.38	12.3	20
0043er	female	y	52	.\clips\43.6 nr(43.0_44.2)152855-Clip679_1.avi	nr	0.5	43.6	47
0043er	female	y	52	.\clips\47.1 wr(46.3_48.0)081019-Clip258_1.avi	wr	0.38	47.1	57
0043er	female	y	52	.\clips\62.5 wr(61.9_63.3)100334-Clip649_1.avi	wr	0.38	62.5	59
0043er	female	y	52	.\clips\17.9 wr(17.8_18.0)085534-Clip713_1.avi	wr	0.38	17.9	27
0043er	female	y	52	.\clips\26.5 wr(26.3_26.7)083227-Clip576_1.avi	wr	0.5	26.5	47
0043er	female	y	52	.\clips\07.9 nr(07.0_08.8)143252-Clip406_1.avi	nr	0.38	7.9	23
0043er	female	y	52	.\clips\33.4 wr(32.8_34.4)132139-Clip1257_1.avi	wr	0.38	33.4	45
0043er	female	y	52	.\clips\32.5 wr(32.3_32.6)085534-Clip840_1.avi	wr	0.38	32.5	53
0043er	female	y	52	.\clips\60.0 wr(58.9_60.7)083227-Clip644_1.avi	wr	1	60	52
0043er	female	y	52	.\clips\53.4 wr(53.1_53.7)133604-Clip637_1.avi	wr	0.5	53.4	57
0043er	female	y	52	.\clips\22.4 wr(21.3_23.3)085534-Clip804_1.avi	wr	0.5	22.4	32
0043er	female	y	52	.\clips\64.4 wr(63.5_65.0)153252-Clip237_1.avi	wr	0.75	64.4	54
0043er	female	y	52	.\clips\31.6 nr(30.6_32.5)135139-Clip51_1.avi	nr	0.38	31.6	44
0043er	female	y	52	.\clips\47.2 nr(46.9_47.5)123137-Clip163_1.avi	nr	0.38	47.2	52
0043er	female	y	52	.\clips\40.7 wr(40.2_41.0)152855-Clip763_1.avi	wr	1	40.7	49
0043er	female	y	52	.\clips\21.2 wr(20.3_21.6)085534-Clip723_1.avi	wr	0.38	21.2	35
0043er	female	y	52	.\clips\37.4 wr(36.9_38.0)133604-Clip287_1.avi	wr	0.38	37.4	46
0043er	female	y	52	.\clips\57.3 nr(56.8_57.5)150252-Clip1157_1.avi	nr	0.75	57.3	58
0043er	female	y	52	.\clips\56.0 nr(55.3_56.9)150252-Clip1298_1.avi	nr	0.5	56	41
0043er	female	y	52	.\clips\33.8 wr(32.9_34.6)132139-Clip1225_1.avi	wr	1	33.8	40
0043er	female	y	52	.\clips\18.3 nr(17.1_19.5)105713-Clip1203_1.avi	nr	0.38	18.3	35
0043er	female	y	52	.\clips\61.7 nr(61.4_62.0)120137-Clip350_1.avi	nr	0.38	61.7	52
0043er	female	y	52	.\clips\25.4 nr(25.1_25.8)085700-Clip82_1.avi	nr	1	25.4	28
0043er	female	y	52	.\clips\28.3 nr(27.8_29.3)100334-Clip236_1.avi	nr	1	28.3	23
0043er	female	y	52	.\clips\54.8 wr(54.2_55.5)133604-Clip622_1.avi	wr	0.75	54.8	62
0043er	female	y	52	.\clips\21.8 wr(21.7_22.0)085534-Clip1048_1.avi	wr	1	21.8	18
0043er	female	y	52	.\clips\05.5 wr(04.6_07.1)123137-Clip474_1.avi	wr	0.5	5.5	16
0043er	female	y	52	.\clips\29.2 wr(28.3_30.3)085534-Clip1693_1.avi	wr	0.5	29.2	25
0043er	female	y	52	.\clips\15.3 nr(14.7_16.3)105713-Clip1198_1.avi	nr	1	15.3	20
0043er	female	y	52	.\clips\37.3 wr(37.1_37.5)133604-Clip226_1.avi	wr	0.75	37.3	41
0043er	female	y	52	.\clips\50.8 wr(50.1_51.5)153252-Clip83_1.avi	wr	0.75	50.8	53
0043er	female	y	52	.\clips\41.7 wr(40.4_42.4)083227-Clip591_1.avi	wr	0.5	41.7	56
0043er	female	y	52	.\clips\23.5 nr(22.4_24.3)135139-Clip64_1.avi	nr	1	23.5	25
0043er	female	y	52	.\clips\25.6 nr(25.4_25.9)085534-Clip315_1.avi	nr	0.5	25.6	32
0043er	female	y	52	.\clips\48.3 nr(47.7_48.9)152855-Clip623_1.avi	nr	1	48.3	48
0043er	female	y	52	.\clips\21.1 wr(21.1_21.2)085534-Clip566_1.avi	wr	0.75	21.1	22
0043er	female	y	52	.\clips\14.0 nr(12.1_15.5)132139-Clip189_1.avi	nr	0.5	14	23
0043er	female	y	52	.\clips\59.5 wr(59.3_59.8)083227-Clip695_1.avi	wr	0.5	59.5	56
0043er	female	y	52	.\clips\52.2 wr(51.9_52.5)153252-Clip78_1.avi	wr	0.38	52.2	61
0043er	female	y	52	.\clips\47.3 nr(46.2_47.9)120137-Clip305_1.avi	nr	0.38	47.3	52
0043er	female	y	52	.\clips\19.1 wr(18.4_19.8)085534-Clip591_1.avi	wr	0.75	19.1	14
0043er	female	y	52	.\clips\24.1 wr(23.4_24.8)123137-Clip25_1.avi	wr	0.75	24.1	35
0043er	female	y	52	.\clips\34.9 wr(33.9_35.9)132139-Clip1263_1.avi	wr	0.75	34.9	42
0043er	female	y	52	.\clips\45.9 nr(44.9_46.8)135139-Clip512_1.avi	nr	1	45.9	46
0043er	female	y	52	.\clips\18.5 wr(17.9_19.2)085534-Clip718_1.avi	wr	0.5	18.5	24
0043er	female	y	52	.\clips\63.9 wr(62.9_64.5)100334-Clip596_1.avi	wr	1	63.9	53
0043er	female	y	52	.\clips\50.0 wr(49.4_51.1)084019-Clip273_1.avi	wr	1	50	54
0043er	female	y	52	.\clips\43.7 wr(42.8_44.2)133604-Clip344_1.avi	wr	0.38	43.7	47
0043er	female	y	52	.\clips\42.5 nr(42.1_42.9)085534-Clip201_1.avi	nr	0.38	42.5	34
0043er	female	y	52	.\clips\42.0 wr(41.7_42.3)133604-Clip349_1.avi	wr	0.75	42	46
0043er	female	y	52	.\clips\15.8 nr(15.4_16.3)085534-Clip67_1.avi	nr	0.5	15.8	25
0043er	female	y	52	.\clips\31.4 wr(30.9_32.1)085534-Clip1698_1.avi	wr	1	31.4	36
0043er	female	y	52	.\clips\44.0 wr(42.9_44.5)121332-Clip257_1.avi	wr	0.5	44	57
0043er	female	y	52	.\clips\07.9 nr(05.9_09.2)110538-Clip209_1.avi	nr	0.38	7.9	18
0043er	female	y	52	.\clips\51.6 nr(50.8_52.2)150252-Clip1069_1.avi	nr	0.75	51.6	51
0043er	female	y	52	.\clips\48.5 wr(48.0_48.8)084019-Clip384_1.avi	wr	1	48.5	55
0043er	female	y	52	.\clips\19.7 nr(19.5_19.9)120137-Clip224_1.avi	nr	0.75	19.7	17
0043er	female	y	52	.\clips\35.7 nr(35.4_35.9)085700-Clip171_1.avi	nr	1	35.7	34
0043er	female	y	52	.\clips\31.5 wr(31.3_31.9)085534-Clip835_1.avi	wr	0.5	31.5	53
0043er	female	y	52	.\clips\09.0 wr(08.9_09.3)123137-Clip416_1.avi	wr	0.75	9	15
0043er	female	y	52	.\clips\05.5 nr(04.5_06.5)150252-Clip1005_1.avi	nr	0.5	5.5	18
0043er	female	y	52	.\clips\06.2 nr(05.7_07.5)132139-Clip249_1.avi	nr	0.75	6.2	12
0043er	female	y	52	.\clips\15.7 wr(15.6_15.8)085700-Clip1447_1.avi	wr	1	15.7	21
0043er	female	y	52	.\clips\31.2 nr(30.4_31.4)135139-Clip74_1.avi	nr	0.75	31.2	38
0043er	female	y	52	.\clips\62.1 nr(61.0_62.8)150252-Clip1173_1.avi	nr	0.38	62.1	62
0043er	female	y	52	.\clips\51.5 wr(51.2_51.8)153252-Clip73_1.avi	wr	0.38	51.5	51
0043er	female	y	52	.\clips\40.5 nr(39.9_41.6)152855-Clip1773_1.avi	nr	1	40.5	47
0043er	female	y	52	.\clips\09.0 nr(09.0_09.1)100635-Clip169_1.avi	nr	0.5	9	17
0043er	female	y	52	.\clips\08.4 wr(08.4_08.5)083227-Clip1722_1.avi	wr	1	8.4	20
0043er	female	y	52	.\clips\19.2 nr(18.2_19.9)100635-Clip1360_1.avi	nr	0.5	19.2	24
0043er	female	y	52	.\clips\11.2 wr(10.4_11.8)083227-Clip1662_1.avi	wr	0.75	11.2	14
0043er	female	y	52	.\clips\49.1 wr(48.3_50.0)081019-Clip263_1.avi	wr	0.75	49.1	54
0043er	female	y	52	.\clips\11.2 nr(09.7_12.8)083227-Clip345_1.avi	nr	0.5	11.2	24
0043er	female	y	52	.\clips\16.4 wr(15.7_17.4)083227-Clip887_1.avi	wr	0.5	16.4	31
0043er	female	y	52	.\clips\21.6 nr(20.6_22.5)083227-Clip396_1.avi	nr	0.38	21.6	25
0043er	female	y	52	.\clips\60.4 nr(60.3_60.5)153252-Clip328_1.avi	nr	0.5	60.4	64
0043er	female	y	52	.\clips\45.7 wr(44.8_46.5)133604-Clip692_1.avi	wr	1	45.7	53
0043er	female	y	52	.\clips\47.8 wr(47.0_48.9)083227-Clip611_1.avi	wr	0.38	47.8	50
0043er	female	y	52	.\clips\11.3 nr(10.7_12.6)150252-Clip979_1.avi	nr	0.75	11.3	23
0043er	female	y	52	.\clips\56.6 wr(55.5_57.4)133604-Clip593_1.avi	wr	0.5	56.6	60
0043er	female	y	52	.\clips\38.2 nr(37.5_38.8)113538-Clip75_1.avi	nr	0.38	38.2	48
0043er	female	y	52	.\clips\33.2 nr(32.9_33.5)112540-Clip1725_1.avi	nr	1	33.2	30
0043er	female	y	52	.\clips\50.5 wr(50.4_50.7)150252-Clip1099_1.avi	wr	0.5	50.5	53
0043er	female	y	52	.\clips\48.8 wr(48.0_49.4)133604-Clip604_1.avi	wr	0.5	48.8	59
0043er	female	y	52	.\clips\16.3 nr(15.4_17.1)120137-Clip186_1.avi	nr	0.75	16.3	24
0043er	female	y	52	.\clips\34.5 nr(34.2_35.2)085700-Clip425_1.avi	nr	0.5	34.5	32
0043er	female	y	52	.\clips\62.8 nr(62.7_62.8)150252-Clip1178_1.avi	nr	0.75	62.8	63
0043er	female	y	52	.\clips\21.3 wr(21.2_21.5)085534-Clip728_1.avi	wr	0.38	21.3	37
0043er	female	y	52	.\clips\39.4 nr(39.1_39.9)135139-Clip356_1.avi	nr	0.75	39.4	48
0043er	female	y	52	.\clips\07.2 wr(06.2_08.0)085534-Clip953_1.avi	wr	0.38	7.2	33
0043er	female	y	52	.\clips\09.5 nr(08.7_10.3)105713-Clip169_1.avi	nr	0.75	9.5	12
0043er	female	y	52	.\clips\48.8 nr(47.1_49.7)123137-Clip252_1.avi	nr	0.5	48.8	51
0043er	female	y	52	.\clips\36.4 wr(35.8_37.4)152855-Clip1501_1.avi	wr	0.5	36.4	51
0043er	female	y	52	.\clips\54.1 nr(53.2_54.6)123137-Clip151_1.avi	nr	0.5	54.1	61
0043er	female	y	52	.\clips\50.9 nr(49.8_51.5)123137-Clip125_1.avi	nr	0.5	50.9	55
0043er	female	y	52	.\clips\12.0 wr(11.6_12.9)083227-Clip770_1.avi	wr	0.38	12	35
0043er	female	y	52	.\clips\18.0 wr(17.9_18.1)085700-Clip1468_1.avi	wr	1	18	29
0043er	female	y	52	.\clips\60.9 nr(60.6_61.2)120137-Clip345_1.avi	nr	0.75	60.9	62
0043er	female	y	52	.\clips\52.0 nr(51.7_52.3)123137-Clip130_1.avi	nr	0.38	52	63
0043er	female	y	52	.\clips\39.1 wr(38.8_39.7)152855-Clip768_1.avi	wr	0.75	39.1	54
0043er	female	y	52	.\clips\28.6 nr(27.5_29.1)100334-Clip125_1.avi	nr	0.5	28.6	39
0043er	female	y	52	.\clips\49.5 nr(49.3_49.6)123137-Clip114_1.avi	nr	0.75	49.5	50
0043er	female	y	52	.\clips\44.8 nr(44.0_45.5)152855-Clip648_1.avi	nr	0.75	44.8	61
0043er	female	y	52	.\clips\34.9 nr(34.4_35.8)085700-Clip430_1.avi	nr	0.75	34.9	43
0043er	female	y	52	.\clips\35.5 wr(34.6_36.1)085534-Clip1586_1.avi	wr	1	35.5	35
0043er	female	y	52	.\clips\53.3 nr(53.1_53.8)150252-Clip1283_1.avi	nr	1	53.3	46
0043er	female	y	52	.\clips\20.8 wr(20.1_21.5)085534-Clip586_1.avi	wr	0.5	20.8	42
0043er	female	y	52	.\clips\26.6 nr(25.9_27.4)100334-Clip209_1.avi	nr	0.75	26.6	39
0043er	female	y	52	.\clips\58.0 wr(57.6_58.3)121332-Clip284_1.avi	wr	0.38	58	63
0043er	female	y	52	.\clips\57.0 wr(56.6_57.4)085534-Clip524_1.avi	wr	0.38	57	63
0043er	female	y	52	.\clips\08.8 wr(07.6_10.5)083227-Clip1657_1.avi	wr	0.5	8.8	24
0043er	female	y	52	.\clips\46.7 wr(45.5_47.4)085534-Clip474_1.avi	wr	0.75	46.7	47
0043er	female	y	52	.\clips\26.7 wr(25.7_27.6)132139-Clip1506_1.avi	wr	0.75	26.7	47
0043er	female	y	52	.\clips\43.8 wr(43.1_44.3)133604-Clip697_1.avi	wr	1	43.8	51
0043er	female	y	52	.\clips\16.5 wr(16.4_16.6)091040-Clip846_1.avi	wr	0.75	16.5	41
0043er	female	y	52	.\clips\57.5 nr(57.2_57.7)123137-Clip812_1.avi	nr	0.38	57.5	52
0043er	female	y	52	.\clips\14.4 wr(14.1_14.6)085534-Clip1201_1.avi	wr	0.75	14.4	29
0043er	female	y	52	.\clips\52.7 nr(52.4_53.1)123137-Clip135_1.avi	nr	0.38	52.7	56
0162le	male	y	65	.\clips\49.1 wr(48.3_50.0)081019-Clip263_1.avi	wr	0.75	49.1	60
0162le	male	y	65	.\clips\43.4 nr(43.3_43.5)132139-Clip575_1.avi	nr	1	43.4	46
0162le	male	y	65	.\clips\11.3 nr(10.7_12.6)150252-Clip979_1.avi	nr	0.38	11.3	27
0162le	male	y	65	.\clips\34.9 nr(34.4_35.8)085700-Clip430_1.avi	nr	0.75	34.9	31
0162le	male	y	65	.\clips\48.5 wr(48.0_48.8)084019-Clip384_1.avi	wr	1	48.5	55
0162le	male	y	65	.\clips\52.7 nr(52.4_53.1)123137-Clip135_1.avi	nr	0.75	52.7	43
0162le	male	y	65	.\clips\18.0 wr(17.9_18.1)085700-Clip1468_1.avi	wr	1	18	32
0162le	male	y	65	.\clips\57.0 wr(56.6_57.4)085534-Clip524_1.avi	wr	0.38	57	56
0162le	male	y	65	.\clips\28.6 wr(27.8_29.7)085534-Clip1683_1.avi	wr	1	28.6	30
0162le	male	y	65	.\clips\15.7 wr(15.6_15.8)085700-Clip1447_1.avi	wr	0.5	15.7	24
0162le	male	y	65	.\clips\62.8 nr(62.7_62.8)150252-Clip1178_1.avi	nr	0.75	62.8	65
0162le	male	y	65	.\clips\50.9 nr(49.8_51.5)123137-Clip125_1.avi	nr	0.5	50.9	53
0162le	male	y	65	.\clips\24.1 wr(23.4_24.8)123137-Clip25_1.avi	wr	0.75	24.1	36
0162le	male	y	65	.\clips\44.8 nr(44.0_45.5)152855-Clip648_1.avi	nr	0.75	44.8	53
0162le	male	y	65	.\clips\44.6 wr(44.1_45.2)083227-Clip601_1.avi	wr	0.75	44.6	38
0162le	male	y	65	.\clips\58.0 wr(57.6_58.3)121332-Clip284_1.avi	wr	0.75	58	56
0162le	male	y	65	.\clips\07.2 wr(06.2_08.0)085534-Clip953_1.avi	wr	0.75	7.2	16
0162le	male	y	65	.\clips\32.5 wr(32.3_32.6)085534-Clip840_1.avi	wr	0.38	32.5	37
0162le	male	y	65	.\clips\62.7 nr(62.6_62.7)150252-Clip1183_1.avi	nr	1	62.7	68
0162le	male	y	65	.\clips\59.3 nr(57.9_60.6)085700-Clip892_1.avi	nr	1	59.3	57
0162le	male	y	65	.\clips\51.6 nr(50.8_52.2)150252-Clip1069_1.avi	nr	0.38	51.6	57
0162le	male	y	65	.\clips\32.3 nr(32.1_32.3)085534-Clip1305_1.avi	nr	0.75	32.3	40
0162le	male	y	65	.\clips\62.1 nr(61.0_62.8)150252-Clip1173_1.avi	nr	0.75	62.1	61
0162le	male	y	65	.\clips\29.5 nr(29.4_29.6)085534-Clip146_1.avi	nr	0.75	29.5	33
0162le	male	y	65	.\clips\38.6 nr(37.6_39.2)123137-Clip84_1.avi	nr	1	38.6	45
0162le	male	y	65	.\clips\54.8 wr(54.2_55.5)133604-Clip622_1.avi	wr	0.75	54.8	58
0162le	male	y	65	.\clips\54.3 nr(53.2_54.7)123137-Clip841_1.avi	nr	0.75	54.3	60
0162le	male	y	65	.\clips\36.4 wr(35.8_37.4)152855-Clip1501_1.avi	wr	0.5	36.4	45
0162le	male	y	65	.\clips\20.4 wr(19.4_20.9)083227-Clip835_1.avi	wr	0.5	20.4	44
0162le	male	y	65	.\clips\56.6 wr(55.5_57.4)133604-Clip593_1.avi	wr	0.5	56.6	63
0162le	male	y	65	.\clips\63.9 wr(62.9_64.5)100334-Clip596_1.avi	wr	1	63.9	58
0162le	male	y	65	.\clips\21.3 wr(21.2_21.5)085534-Clip728_1.avi	wr	0.75	21.3	30
0162le	male	y	65	.\clips\14.3 nr(13.7_15.0)085534-Clip62_1.avi	nr	0.75	14.3	24
0162le	male	y	65	.\clips\05.4 nr(04.7_06.1)103635-Clip535_1.avi	nr	0.5	5.4	22
0162le	male	y	65	.\clips\20.3 nr(19.9_21.3)091040-Clip98_1.avi	nr	0.5	20.3	28
0162le	male	y	65	.\clips\44.0 wr(42.9_44.5)121332-Clip257_1.avi	wr	1	44	46
0162le	male	y	65	.\clips\37.1 nr(36.9_37.3)152855-Clip575_1.avi	nr	0.38	37.1	42
0162le	male	y	65	.\clips\05.3 wr(03.9_06.0)123137-Clip456_1.avi	wr	0.5	5.3	13
0162le	male	y	65	.\clips\46.7 nr(45.7_47.5)123137-Clip913_1.avi	nr	0.5	46.7	58
0162le	male	y	65	.\clips\31.6 nr(30.6_32.5)135139-Clip51_1.avi	nr	0.38	31.6	50
0162le	male	y	65	.\clips\43.8 wr(43.1_44.3)133604-Clip697_1.avi	wr	1	43.8	48
0162le	male	y	65	.\clips\64.2 wr(63.1_64.8)153252-Clip211_1.avi	wr	1	64.2	55
0162le	male	y	65	.\clips\16.4 wr(15.7_17.4)083227-Clip887_1.avi	wr	0.5	16.4	20
0162le	male	y	65	.\clips\48.3 nr(47.7_48.9)152855-Clip623_1.avi	nr	1	48.3	50
0162le	male	y	65	.\clips\21.1 wr(21.1_21.2)085534-Clip566_1.avi	wr	0.38	21.1	33
0162le	male	y	65	.\clips\26.7 wr(25.7_27.6)132139-Clip1506_1.avi	wr	0.38	26.7	37
0162le	male	y	65	.\clips\64.4 wr(63.5_65.0)153252-Clip237_1.avi	wr	0.75	64.4	55
0162le	male	y	65	.\clips\47.1 wr(46.3_48.0)081019-Clip258_1.avi	wr	0.38	47.1	58
0162le	male	y	65	.\clips\05.5 nr(04.5_06.5)150252-Clip1005_1.avi	nr	0.5	5.5	18
0162le	male	y	65	.\clips\13.6 wr(13.4_13.9)085534-Clip1206_1.avi	wr	1	13.6	18
0162le	male	y	65	.\clips\47.2 nr(46.9_47.5)123137-Clip163_1.avi	nr	0.38	47.2	53
0162le	male	y	65	.\clips\41.0 nr(40.9_41.2)085700-Clip949_1.avi	nr	0.5	41	50
0162le	male	y	65	.\clips\54.1 nr(53.2_54.6)123137-Clip151_1.avi	nr	1	54.1	46
0162le	male	y	65	.\clips\38.1 wr(38.0_38.3)152855-Clip798_1.avi	wr	1	38.1	47
0162le	male	y	65	.\clips\10.1 nr(09.2_11.6)152855-Clip352_1.avi	nr	0.5	10.1	24
0162le	male	y	65	.\clips\16.5 wr(16.4_16.6)091040-Clip846_1.avi	wr	0.38	16.5	27
0162le	male	y	65	.\clips\43.1 nr(42.3_43.7)132139-Clip654_1.avi	nr	0.75	43.1	33
0162le	male	y	65	.\clips\48.8 nr(47.1_49.7)123137-Clip252_1.avi	nr	1	48.8	32
0162le	male	y	65	.\clips\57.3 nr(56.8_57.5)150252-Clip1157_1.avi	nr	0.38	57.3	43
0162le	male	y	65	.\clips\59.7 wr(59.6_60.0)084019-Clip115_1.avi	wr	0.75	59.7	49
0162le	male	y	65	.\clips\61.3 wr(60.9_62.3)100334-Clip590_1.avi	wr	0.38	61.3	57
0162le	male	y	65	.\clips\35.7 nr(35.4_35.9)085700-Clip171_1.avi	nr	0.5	35.7	38
0162le	male	y	65	.\clips\35.5 wr(34.6_36.1)085534-Clip1586_1.avi	wr	0.5	35.5	38
0162le	male	y	65	.\clips\33.8 wr(32.9_34.6)132139-Clip1225_1.avi	wr	1	33.8	37
0162le	male	y	65	.\clips\19.2 nr(18.2_19.9)100635-Clip1360_1.avi	nr	1	19.2	30
0162le	male	y	65	.\clips\41.9 nr(41.5_42.3)123137-Clip901_1.avi	nr	0.38	41.9	52
0162le	male	y	65	.\clips\40.7 wr(40.2_41.0)152855-Clip763_1.avi	wr	0.5	40.7	48
0162le	male	y	65	.\clips\19.1 wr(18.4_19.8)085534-Clip591_1.avi	wr	0.75	19.1	27
0162le	male	y	65	.\clips\20.2 nr(19.4_21.3)110538-Clip1556_1.avi	nr	0.5	20.2	25
0162le	male	y	65	.\clips\60.9 nr(60.6_61.2)120137-Clip345_1.avi	nr	0.38	60.9	48
0162le	male	y	65	.\clips\18.3 nr(17.1_19.5)105713-Clip1203_1.avi	nr	0.75	18.3	29
0162le	male	y	65	.\clips\08.4 wr(08.4_08.5)083227-Clip1722_1.avi	wr	1	8.4	9
0162le	male	y	65	.\clips\43.6 nr(43.0_44.2)152855-Clip679_1.avi	nr	1	43.6	50
0162le	male	y	65	.\clips\34.9 wr(33.9_35.9)132139-Clip1263_1.avi	wr	0.75	34.9	37
0162le	male	y	65	.\clips\22.4 wr(21.3_23.3)085534-Clip804_1.avi	wr	1	22.4	15
0162le	male	y	65	.\clips\55.4 nr(54.6_56.4)120137-Clip325_1.avi	nr	0.5	55.4	40
0162le	male	y	65	.\clips\21.8 wr(21.7_22.0)085534-Clip1048_1.avi	wr	1	21.8	19
0162le	male	y	65	.\clips\16.8 nr(15.8_17.8)100635-Clip1253_1.avi	nr	0.38	16.8	32
0162le	male	y	65	.\clips\10.8 wr(09.9_11.8)083227-Clip1336_1.avi	wr	0.5	10.8	10
0162le	male	y	65	.\clips\11.7 nr(11.2_11.8)105713-Clip158_1.avi	nr	0.38	11.7	18
0162le	male	y	65	.\clips\58.4 wr(57.6_58.9)153252-Clip21_1.avi	wr	1	58.4	50
0162le	male	y	65	.\clips\14.4 wr(14.1_14.6)085534-Clip1201_1.avi	wr	0.75	14.4	19
0162le	male	y	65	.\clips\31.5 wr(31.3_31.9)085534-Clip835_1.avi	wr	0.5	31.5	48
0162le	male	y	65	.\clips\13.8 nr(13.3_14.3)083227-Clip367_1.avi	nr	0.75	13.8	22
0162le	male	y	65	.\clips\12.0 wr(11.6_12.9)083227-Clip770_1.avi	wr	0.38	12	14
0162le	male	y	65	.\clips\16.3 nr(15.4_17.1)120137-Clip186_1.avi	nr	0.38	16.3	30
0162le	male	y	65	.\clips\31.4 wr(30.9_32.1)085534-Clip1698_1.avi	wr	0.5	31.4	35
0162le	male	y	65	.\clips\42.0 wr(41.7_42.3)133604-Clip349_1.avi	wr	0.38	42	48
0162le	male	y	65	.\clips\57.5 nr(57.1_58.0)120137-Clip335_1.avi	nr	0.38	57.5	45
0162le	male	y	65	.\clips\10.9 wr(10.4_11.5)091040-Clip1582_1.avi	wr	0.5	10.9	20
0162le	male	y	65	.\clips\60.1 nr(60.0_60.2)153252-Clip333_1.avi	nr	0.5	60.1	57
0162le	male	y	65	.\clips\55.0 wr(54.9_55.2)085534-Clip514_1.avi	wr	0.5	55	47
0162le	male	y	65	.\clips\09.0 nr(09.0_09.1)100635-Clip169_1.avi	nr	1	9	11
0162le	male	y	65	.\clips\58.4 nr(58.0_58.9)123137-Clip817_1.avi	nr	1	58.4	61
0162le	male	y	65	.\clips\37.4 wr(36.9_38.0)133604-Clip287_1.avi	wr	0.38	37.4	39
0162le	male	y	65	.\clips\06.5 wr(05.5_08.1)083227-Clip1674_1.avi	wr	0.38	6.5	15
0162le	male	y	65	.\clips\28.3 nr(27.8_29.3)100334-Clip236_1.avi	nr	1	28.3	24
0162le	male	y	65	.\clips\45.9 nr(44.9_46.8)135139-Clip512_1.avi	nr	0.5	45.9	52
0162le	male	y	65	.\clips\32.1 wr(31.2_32.9)085534-Clip820_1.avi	wr	0.38	32.1	47
0162le	male	y	65	.\clips\39.4 nr(39.1_39.9)135139-Clip356_1.avi	nr	0.75	39.4	43
0162le	male	y	65	.\clips\49.5 nr(49.3_49.6)123137-Clip114_1.avi	nr	0.75	49.5	50
0162le	male	y	65	.\clips\46.7 wr(45.5_47.4)085534-Clip474_1.avi	wr	0.38	46.7	48
0162le	male	y	65	.\clips\29.7 wr(29.4_30.0)152855-Clip1053_1.avi	wr	0.75	29.7	37
0162le	male	y	65	.\clips\09.5 nr(08.7_10.3)105713-Clip169_1.avi	nr	0.75	9.5	20
0162le	male	y	65	.\clips\56.7 wr(55.7_57.3)153252-Clip16_1.avi	wr	0.38	56.7	52
0162le	male	y	65	.\clips\47.3 nr(46.2_47.9)120137-Clip305_1.avi	nr	0.75	47.3	45
0162le	male	y	65	.\clips\08.8 wr(07.6_10.5)083227-Clip1657_1.avi	wr	1	8.8	12
0162le	male	y	65	.\clips\25.0 wr(23.9_25.8)085534-Clip809_1.avi	wr	0.5	25	24
0162le	male	y	65	.\clips\21.2 wr(20.3_21.6)085534-Clip723_1.avi	wr	0.38	21.2	24
0162le	male	y	65	.\clips\23.5 nr(22.4_24.3)135139-Clip64_1.avi	nr	1	23.5	28
0162le	male	y	65	.\clips\60.0 wr(58.9_60.7)083227-Clip644_1.avi	wr	0.5	60	51
0162le	male	y	65	.\clips\28.6 nr(27.5_29.1)100334-Clip125_1.avi	nr	1	28.6	30
0162le	male	y	65	.\clips\36.0 nr(35.3_36.5)132139-Clip720_1.avi	nr	0.5	36	45
0162le	male	y	65	.\clips\52.9 wr(52.8_53.0)133604-Clip632_1.avi	wr	1	52.9	47
0162le	male	y	65	.\clips\05.5 wr(04.6_07.1)123137-Clip474_1.avi	wr	0.5	5.5	10
0162le	male	y	65	.\clips\50.8 wr(50.1_51.5)153252-Clip83_1.avi	wr	0.38	50.8	58
0162le	male	y	65	.\clips\13.9 nr(13.1_14.6)105713-Clip1229_1.avi	nr	1	13.9	23
0162le	male	y	65	.\clips\27.1 nr(26.4_28.2)085534-Clip330_1.avi	nr	0.38	27.1	35
0162le	male	y	65	.\clips\27.2 wr(26.2_27.9)085534-Clip976_1.avi	wr	0.38	27.2	34
0162le	male	y	65	.\clips\05.7 wr(04.8_07.4)123137-Clip521_1.avi	wr	0.38	5.7	13
0162le	male	y	65	.\clips\22.9 nr(22.1_23.8)085700-Clip395_1.avi	nr	0.75	22.9	34
0162le	male	y	65	.\clips\09.0 wr(08.9_09.3)123137-Clip416_1.avi	wr	0.75	9	10
0162le	male	y	65	.\clips\29.2 wr(28.3_30.3)085534-Clip1693_1.avi	wr	1	29.2	28
0162le	male	y	65	.\clips\15.3 nr(14.7_16.3)105713-Clip1198_1.avi	nr	0.5	15.3	23
0162le	male	y	65	.\clips\07.9 nr(07.0_08.8)143252-Clip406_1.avi	nr	0.75	7.9	18
0162le	male	y	65	.\clips\26.6 nr(25.9_27.4)100334-Clip209_1.avi	nr	0.38	26.6	30
0162le	male	y	65	.\clips\63.2 wr(63.0_63.4)084019-Clip250_1.avi	wr	0.75	63.2	59
0162le	male	y	65	.\clips\53.4 wr(53.1_53.7)133604-Clip637_1.avi	wr	1	53.4	50
0162le	male	y	65	.\clips\60.6 wr(60.4_60.7)083227-Clip649_1.avi	wr	0.5	60.6	55
0162le	male	y	65	.\clips\21.1 nr(20.3_21.9)100635-Clip1355_1.avi	nr	0.38	21.1	30
0162le	male	y	65	.\clips\39.1 wr(38.8_39.7)152855-Clip768_1.avi	wr	0.75	39.1	42
0162le	male	y	65	.\clips\37.3 wr(37.1_37.5)133604-Clip226_1.avi	wr	0.38	37.3	30
0162le	male	y	65	.\clips\50.0 wr(49.4_51.1)084019-Clip273_1.avi	wr	0.5	50	53
0162le	male	y	65	.\clips\37.5 wr(36.8_38.3)152855-Clip1648_1.avi	wr	0.75	37.5	47
0162le	male	y	65	.\clips\34.8 wr(34.6_35.3)135139-Clip224_1.avi	wr	1	34.8	38
0162le	male	y	65	.\clips\11.2 nr(09.7_12.8)083227-Clip345_1.avi	nr	0.5	11.2	12
0162le	male	y	65	.\clips\46.7 nr(46.6_46.8)152855-Clip725_1.avi	nr	0.38	46.7	58
0162le	male	y	65	.\clips\25.6 nr(25.4_25.9)085534-Clip315_1.avi	nr	0.5	25.6	30
0162le	male	y	65	.\clips\23.9 nr(23.3_24.4)132139-Clip503_1.avi	nr	1	23.9	37
0162le	male	y	65	.\clips\33.4 wr(32.8_34.4)132139-Clip1257_1.avi	wr	0.75	33.4	44
0162le	male	y	65	.\clips\15.8 nr(15.4_16.3)085534-Clip67_1.avi	nr	0.5	15.8	28
0162le	male	y	65	.\clips\12.3 wr(11.2_13.1)085534-Clip1099_1.avi	wr	0.75	12.3	12
0162le	male	y	65	.\clips\30.2 nr(29.6_31.2)171711-Clip306_1.avi	nr	0.5	30.2	30
0162le	male	y	65	.\clips\47.8 wr(47.0_48.9)083227-Clip611_1.avi	wr	0.75	47.8	50
0162le	male	y	65	.\clips\18.6 nr(18.1_19.2)110538-Clip1333_1.avi	nr	1	18.6	24
0162le	male	y	65	.\clips\43.0 wr(42.9_43.1)133604-Clip702_1.avi	wr	0.38	43	60
0162le	male	y	65	.\clips\21.6 nr(20.6_22.5)083227-Clip396_1.avi	nr	0.38	21.6	32
0162le	male	y	65	.\clips\27.6 nr(27.1_28.1)085534-Clip325_1.avi	nr	0.75	27.6	33
0162le	male	y	65	.\clips\59.6 nr(58.6_60.4)120137-Clip340_1.avi	nr	0.75	59.6	50
0162le	male	y	65	.\clips\52.2 wr(51.9_52.5)153252-Clip78_1.avi	wr	0.75	52.2	55
0162le	male	y	65	.\clips\57.5 nr(57.2_57.7)123137-Clip812_1.avi	nr	0.75	57.5	49
0162le	male	y	65	.\clips\61.7 nr(61.4_62.0)120137-Clip350_1.avi	nr	0.38	61.7	58
0162le	male	y	65	.\clips\33.2 nr(32.9_33.5)112540-Clip1725_1.avi	nr	1	33.2	33
0162le	male	y	65	.\clips\31.2 nr(30.4_31.4)135139-Clip74_1.avi	nr	0.38	31.2	41
0162le	male	y	65	.\clips\26.5 wr(26.3_26.7)083227-Clip576_1.avi	wr	0.5	26.5	39
0162le	male	y	65	.\clips\51.5 wr(51.2_51.8)153252-Clip73_1.avi	wr	0.38	51.5	50
0162le	male	y	65	.\clips\34.5 nr(34.2_35.2)085700-Clip425_1.avi	nr	1	34.5	40
0162le	male	y	65	.\clips\17.9 wr(17.8_18.0)085534-Clip713_1.avi	wr	0.75	17.9	15
0162le	male	y	65	.\clips\06.2 nr(05.7_07.5)132139-Clip249_1.avi	nr	0.38	6.2	15
0162le	male	y	65	.\clips\39.0 nr(38.9_39.2)135139-Clip341_1.avi	nr	1	39	48
0162le	male	y	65	.\clips\52.0 nr(51.7_52.3)123137-Clip130_1.avi	nr	0.38	52	56
0162le	male	y	65	.\clips\18.5 wr(17.9_19.2)085534-Clip718_1.avi	wr	1	18.5	19
0162le	male	y	65	.\clips\38.7 wr(37.9_39.4)152855-Clip1643_1.avi	wr	1	38.7	37
0162le	male	y	65	.\clips\62.1 nr(61.6_62.3)084019-Clip180_1.avi	nr	1	62.1	60
0162le	male	y	65	.\clips\46.2 wr(45.7_46.8)083227-Clip606_1.avi	wr	0.5	46.2	55
0162le	male	y	65	.\clips\25.4 nr(25.1_25.8)085700-Clip82_1.avi	nr	0.5	25.4	31
0162le	male	y	65	.\clips\42.5 nr(42.1_42.9)085534-Clip201_1.avi	nr	0.38	42.5	45
0162le	male	y	65	.\clips\12.9 wr(12.2_13.2)085534-Clip1211_1.avi	wr	1	12.9	12
0162le	male	y	65	.\clips\24.8 nr(23.6_26.0)085534-Clip1440_1.avi	nr	0.75	24.8	36
0162le	male	y	65	.\clips\56.0 nr(55.3_56.9)150252-Clip1298_1.avi	nr	0.5	56	42
0162le	male	y	65	.\clips\07.9 nr(05.9_09.2)110538-Clip209_1.avi	nr	0.38	7.9	13
0162le	male	y	65	.\clips\50.5 wr(50.4_50.7)150252-Clip1099_1.avi	wr	0.5	50.5	55
0162le	male	y	65	.\clips\14.0 nr(12.1_15.5)132139-Clip189_1.avi	nr	1	14	21
0162le	male	y	65	.\clips\60.4 nr(60.3_60.5)153252-Clip328_1.avi	nr	0.5	60.4	53
0162le	male	y	65	.\clips\53.3 nr(53.1_53.8)150252-Clip1283_1.avi	nr	1	53.3	48
0162le	male	y	65	.\clips\16.7 wr(16.6_16.7)091040-Clip871_1.avi	wr	0.38	16.7	30
0162le	male	y	65	.\clips\41.7 wr(40.4_42.4)083227-Clip591_1.avi	wr	0.5	41.7	50
0162le	male	y	65	.\clips\45.7 wr(44.8_46.5)133604-Clip692_1.avi	wr	0.5	45.7	55
0162le	male	y	65	.\clips\62.5 wr(61.9_63.3)100334-Clip649_1.avi	wr	0.38	62.5	54
0162le	male	y	65	.\clips\30.4 nr(29.3_31.2)100334-Clip182_1.avi	nr	0.5	30.4	38
0162le	male	y	65	.\clips\11.2 wr(10.4_11.8)083227-Clip1662_1.avi	wr	0.38	11.2	10
0162le	male	y	65	.\clips\43.7 wr(42.8_44.2)133604-Clip344_1.avi	wr	0.75	43.7	50
0162le	male	y	65	.\clips\59.5 wr(59.3_59.8)083227-Clip695_1.avi	wr	1	59.5	55
0162le	male	y	65	.\clips\20.8 wr(20.1_21.5)085534-Clip586_1.avi	wr	0.5	20.8	33
0162le	male	y	65	.\clips\38.2 nr(37.5_38.8)113538-Clip75_1.avi	nr	0.75	38.2	38
0162le	male	y	65	.\clips\38.0 nr(37.3_39.0)135139-Clip366_1.avi	nr	0.38	38	50
0162le	male	y	65	.\clips\08.2 nr(07.5_08.7)112540-Clip813_1.avi	nr	1	8.2	24
0162le	male	y	65	.\clips\27.5 wr(26.6_28.5)152855-Clip1626_1.avi	wr	0.75	27.5	46
0162le	male	y	65	.\clips\19.7 nr(19.5_19.9)120137-Clip224_1.avi	nr	0.75	19.7	24
0162le	male	y	65	.\clips\50.3 nr(49.2_51.0)150252-Clip1226_1.avi	nr	0.5	50.3	43
0162le	male	y	65	.\clips\48.8 wr(48.0_49.4)133604-Clip604_1.avi	wr	1	48.8	48
0162le	male	y	65	.\clips\40.5 nr(39.9_41.6)152855-Clip1773_1.avi	nr	0.5	40.5	48
1068go	male	y	8	.\clips\08.4 wr(08.4_08.5)083227-Clip1722_1.avi	wr	0.5	8.4	7
1068go	male	y	8	.\clips\05.3 wr(03.9_06.0)123137-Clip456_1.avi	wr	1	5.3	5
1068go	male	y	8	.\clips\37.1 nr(36.9_37.3)152855-Clip575_1.avi	nr	0.5	37.1	35
1068go	male	y	8	.\clips\55.4 nr(54.6_56.4)120137-Clip325_1.avi	nr	1	55.4	30
1068go	male	y	8	.\clips\36.4 wr(35.8_37.4)152855-Clip1501_1.avi	wr	0.75	36.4	37
1068go	male	y	8	.\clips\61.7 nr(61.4_62.0)120137-Clip350_1.avi	nr	0.38	61.7	42
1068go	male	y	8	.\clips\06.5 wr(05.5_08.1)083227-Clip1674_1.avi	wr	0.38	6.5	5
1068go	male	y	8	.\clips\31.4 wr(30.9_32.1)085534-Clip1698_1.avi	wr	1	31.4	16
1068go	male	y	8	.\clips\05.4 nr(04.7_06.1)103635-Clip535_1.avi	nr	1	5.4	7
1068go	male	y	8	.\clips\18.0 wr(17.9_18.1)085700-Clip1468_1.avi	wr	0.5	18	10
1068go	male	y	8	.\clips\36.0 nr(35.3_36.5)132139-Clip720_1.avi	nr	0.75	36	36
1068go	male	y	8	.\clips\63.9 wr(62.9_64.5)100334-Clip596_1.avi	wr	0.5	63.9	63
1068go	male	y	8	.\clips\18.6 nr(18.1_19.2)110538-Clip1333_1.avi	nr	0.5	18.6	10
1068go	male	y	8	.\clips\61.3 wr(60.9_62.3)100334-Clip590_1.avi	wr	0.5	61.3	63
1068go	male	y	8	.\clips\58.4 wr(57.6_58.9)153252-Clip21_1.avi	wr	0.5	58.4	60
1068go	male	y	8	.\clips\10.9 wr(10.4_11.5)091040-Clip1582_1.avi	wr	0.75	10.9	5
1068go	male	y	8	.\clips\46.7 wr(45.5_47.4)085534-Clip474_1.avi	wr	0.5	46.7	55
1068go	male	y	8	.\clips\19.1 wr(18.4_19.8)085534-Clip591_1.avi	wr	0.38	19.1	9
1068go	male	y	8	.\clips\59.7 wr(59.6_60.0)084019-Clip115_1.avi	wr	0.38	59.7	64
1068go	male	y	8	.\clips\60.6 wr(60.4_60.7)083227-Clip649_1.avi	wr	0.75	60.6	40
1068go	male	y	8	.\clips\26.5 wr(26.3_26.7)083227-Clip576_1.avi	wr	0.75	26.5	20
1068go	male	y	8	.\clips\05.5 nr(04.5_06.5)150252-Clip1005_1.avi	nr	0.75	5.5	6
1068go	male	y	8	.\clips\57.5 nr(57.2_57.7)123137-Clip812_1.avi	nr	1	57.5	40
1068go	male	y	8	.\clips\21.8 wr(21.7_22.0)085534-Clip1048_1.avi	wr	0.5	21.8	8
1068go	male	y	8	.\clips\43.4 nr(43.3_43.5)132139-Clip575_1.avi	nr	0.5	43.4	45
1068go	male	y	8	.\clips\43.1 nr(42.3_43.7)132139-Clip654_1.avi	nr	1	43.1	32
1068go	male	y	8	.\clips\38.0 nr(37.3_39.0)135139-Clip366_1.avi	nr	0.38	38	43
1068go	male	y	8	.\clips\41.9 nr(41.5_42.3)123137-Clip901_1.avi	nr	0.5	41.9	40
1068go	male	y	8	.\clips\48.5 wr(48.0_48.8)084019-Clip384_1.avi	wr	0.5	48.5	56
1068go	male	y	8	.\clips\33.8 wr(32.9_34.6)132139-Clip1225_1.avi	wr	0.5	33.8	30
1068go	male	y	8	.\clips\47.2 nr(46.9_47.5)123137-Clip163_1.avi	nr	0.38	47.2	48
1068go	male	y	8	.\clips\26.7 wr(25.7_27.6)132139-Clip1506_1.avi	wr	0.5	26.7	20
1068go	male	y	8	.\clips\32.3 nr(32.1_32.3)085534-Clip1305_1.avi	nr	1	32.3	17
1068go	male	y	8	.\clips\64.2 wr(63.1_64.8)153252-Clip211_1.avi	wr	0.75	64.2	60
1068go	male	y	8	.\clips\62.5 wr(61.9_63.3)100334-Clip649_1.avi	wr	0.38	62.5	64
1068go	male	y	8	.\clips\30.4 nr(29.3_31.2)100334-Clip182_1.avi	nr	0.75	30.4	25
1068go	male	y	8	.\clips\33.2 nr(32.9_33.5)112540-Clip1725_1.avi	nr	0.5	33.2	29
1068go	male	y	8	.\clips\11.7 nr(11.2_11.8)105713-Clip158_1.avi	nr	0.38	11.7	8
1068go	male	y	8	.\clips\29.7 wr(29.4_30.0)152855-Clip1053_1.avi	wr	0.38	29.7	29
1068go	male	y	8	.\clips\15.7 wr(15.6_15.8)085700-Clip1447_1.avi	wr	1	15.7	5
1068go	male	y	8	.\clips\60.9 nr(60.6_61.2)120137-Clip345_1.avi	nr	0.5	60.9	45
1068go	male	y	8	.\clips\20.8 wr(20.1_21.5)085534-Clip586_1.avi	wr	0.75	20.8	8
1068go	male	y	8	.\clips\16.8 nr(15.8_17.8)100635-Clip1253_1.avi	nr	0.38	16.8	18
1068go	male	y	8	.\clips\44.6 wr(44.1_45.2)083227-Clip601_1.avi	wr	0.38	44.6	40
1068go	male	y	8	.\clips\45.7 wr(44.8_46.5)133604-Clip692_1.avi	wr	1	45.7	37
1068go	male	y	8	.\clips\12.9 wr(12.2_13.2)085534-Clip1211_1.avi	wr	0.5	12.9	6
1068go	male	y	8	.\clips\54.8 wr(54.2_55.5)133604-Clip622_1.avi	wr	0.38	54.8	60
1068go	male	y	8	.\clips\13.8 nr(13.3_14.3)083227-Clip367_1.avi	nr	1	13.8	10
1068go	male	y	8	.\clips\12.3 wr(11.2_13.1)085534-Clip1099_1.avi	wr	1	12.3	7
1068go	male	y	8	.\clips\15.3 nr(14.7_16.3)105713-Clip1198_1.avi	nr	1	15.3	17
1068go	male	y	8	.\clips\08.8 wr(07.6_10.5)083227-Clip1657_1.avi	wr	0.75	8.8	6
1068go	male	y	8	.\clips\10.1 nr(09.2_11.6)152855-Clip352_1.avi	nr	1	10.1	7
1068go	male	y	8	.\clips\38.2 nr(37.5_38.8)113538-Clip75_1.avi	nr	1	38.2	18
1068go	male	y	8	.\clips\57.5 nr(57.1_58.0)120137-Clip335_1.avi	nr	0.38	57.5	50
1068go	male	y	8	.\clips\44.0 wr(42.9_44.5)121332-Clip257_1.avi	wr	0.75	44	40
1068go	male	y	8	.\clips\62.8 nr(62.7_62.8)150252-Clip1178_1.avi	nr	0.38	62.8	62
1068go	male	y	8	.\clips\13.6 wr(13.4_13.9)085534-Clip1206_1.avi	wr	0.75	13.6	8
1068go	male	y	8	.\clips\25.0 wr(23.9_25.8)085534-Clip809_1.avi	wr	1	25	10
1068go	male	y	8	.\clips\21.3 wr(21.2_21.5)085534-Clip728_1.avi	wr	1	21.3	8
1068go	male	y	8	.\clips\55.0 wr(54.9_55.2)085534-Clip514_1.avi	wr	1	55	40
1068go	male	y	8	.\clips\34.9 wr(33.9_35.9)132139-Clip1263_1.avi	wr	0.38	34.9	33
1068go	male	y	8	.\clips\29.5 nr(29.4_29.6)085534-Clip146_1.avi	nr	0.38	29.5	28
1068go	male	y	8	.\clips\46.7 nr(46.6_46.8)152855-Clip725_1.avi	nr	0.5	46.7	45
1068go	male	y	8	.\clips\43.8 wr(43.1_44.3)133604-Clip697_1.avi	wr	0.5	43.8	47
1068go	male	y	8	.\clips\31.5 wr(31.3_31.9)085534-Clip835_1.avi	wr	0.75	31.5	13
1068go	male	y	8	.\clips\18.5 wr(17.9_19.2)085534-Clip718_1.avi	wr	0.75	18.5	8
1068go	male	y	8	.\clips\32.1 wr(31.2_32.9)085534-Clip820_1.avi	wr	0.5	32.1	16
1068go	male	y	8	.\clips\21.2 wr(20.3_21.6)085534-Clip723_1.avi	wr	0.38	21.2	10
1068go	male	y	8	.\clips\05.5 wr(04.6_07.1)123137-Clip474_1.avi	wr	0.75	5.5	5
1068go	male	y	8	.\clips\28.3 nr(27.8_29.3)100334-Clip236_1.avi	nr	0.5	28.3	28
1068go	male	y	8	.\clips\43.0 wr(42.9_43.1)133604-Clip702_1.avi	wr	0.38	43	45
1068go	male	y	8	.\clips\38.6 nr(37.6_39.2)123137-Clip84_1.avi	nr	0.5	38.6	48
1068go	male	y	8	.\clips\53.3 nr(53.1_53.8)150252-Clip1283_1.avi	nr	0.5	53.3	36
1068go	male	y	8	.\clips\46.7 nr(45.7_47.5)123137-Clip913_1.avi	nr	0.75	46.7	43
1068go	male	y	8	.\clips\60.0 wr(58.9_60.7)083227-Clip644_1.avi	wr	1	60	22
1068go	male	y	8	.\clips\10.8 wr(09.9_11.8)083227-Clip1336_1.avi	wr	1	10.8	6
1068go	male	y	8	.\clips\51.5 wr(51.2_51.8)153252-Clip73_1.avi	wr	0.38	51.5	59
1068go	male	y	8	.\clips\23.9 nr(23.3_24.4)132139-Clip503_1.avi	nr	0.75	23.9	20
1068go	male	y	8	.\clips\41.7 wr(40.4_42.4)083227-Clip591_1.avi	wr	0.75	41.7	15
1068go	male	y	8	.\clips\35.7 nr(35.4_35.9)085700-Clip171_1.avi	nr	1	35.7	20
1068go	male	y	8	.\clips\56.7 wr(55.7_57.3)153252-Clip16_1.avi	wr	0.5	56.7	55
1068go	male	y	8	.\clips\33.4 wr(32.8_34.4)132139-Clip1257_1.avi	wr	1	33.4	30
1068go	male	y	8	.\clips\39.4 nr(39.1_39.9)135139-Clip356_1.avi	nr	0.38	39.4	46
1068go	male	y	8	.\clips\31.2 nr(30.4_31.4)135139-Clip74_1.avi	nr	0.5	31.2	28
1068go	male	y	8	.\clips\28.6 nr(27.5_29.1)100334-Clip125_1.avi	nr	0.75	28.6	20
1068go	male	y	8	.\clips\46.2 wr(45.7_46.8)083227-Clip606_1.avi	wr	0.75	46.2	21
1068go	male	y	8	.\clips\52.7 nr(52.4_53.1)123137-Clip135_1.avi	nr	1	52.7	40
1068go	male	y	8	.\clips\39.0 nr(38.9_39.2)135139-Clip341_1.avi	nr	0.75	39	39
1068go	male	y	8	.\clips\21.1 nr(20.3_21.9)100635-Clip1355_1.avi	nr	0.5	21.1	22
1068go	male	y	8	.\clips\62.1 nr(61.6_62.3)084019-Clip180_1.avi	nr	0.5	62.1	65
1068go	male	y	8	.\clips\27.2 wr(26.2_27.9)085534-Clip976_1.avi	wr	0.38	27.2	18
1068go	male	y	8	.\clips\14.0 nr(12.1_15.5)132139-Clip189_1.avi	nr	0.75	14	12
1068go	male	y	8	.\clips\57.3 nr(56.8_57.5)150252-Clip1157_1.avi	nr	0.5	57.3	59
1068go	male	y	8	.\clips\35.5 wr(34.6_36.1)085534-Clip1586_1.avi	wr	1	35.5	24
1068go	male	y	8	.\clips\50.5 wr(50.4_50.7)150252-Clip1099_1.avi	wr	0.75	50.5	57
1068go	male	y	8	.\clips\44.8 nr(44.0_45.5)152855-Clip648_1.avi	nr	0.38	44.8	49
1068go	male	y	8	.\clips\38.1 wr(38.0_38.3)152855-Clip798_1.avi	wr	0.5	38.1	48
1068go	male	y	8	.\clips\49.1 wr(48.3_50.0)081019-Clip263_1.avi	wr	0.38	49.1	61
1068go	male	y	8	.\clips\17.9 wr(17.8_18.0)085534-Clip713_1.avi	wr	1	17.9	6
1068go	male	y	8	.\clips\34.9 nr(34.4_35.8)085700-Clip430_1.avi	nr	0.38	34.9	27
1068go	male	y	8	.\clips\47.8 wr(47.0_48.9)083227-Clip611_1.avi	wr	1	47.8	19
1068go	male	y	8	.\clips\31.6 nr(30.6_32.5)135139-Clip51_1.avi	nr	0.38	31.6	30
1068go	male	y	8	.\clips\13.9 nr(13.1_14.6)105713-Clip1229_1.avi	nr	0.5	13.9	17
1068go	male	y	8	.\clips\50.0 wr(49.4_51.1)084019-Clip273_1.avi	wr	1	50	48
1068go	male	y	8	.\clips\42.0 wr(41.7_42.3)133604-Clip349_1.avi	wr	0.5	42	50
1068go	male	y	8	.\clips\32.5 wr(32.3_32.6)085534-Clip840_1.avi	wr	0.38	32.5	20
1068go	male	y	8	.\clips\22.4 wr(21.3_23.3)085534-Clip804_1.avi	wr	0.75	22.4	10
1068go	male	y	8	.\clips\59.5 wr(59.3_59.8)083227-Clip695_1.avi	wr	0.75	59.5	62
1068go	male	y	8	.\clips\62.7 nr(62.6_62.7)150252-Clip1183_1.avi	nr	0.75	62.7	63
1068go	male	y	8	.\clips\39.1 wr(38.8_39.7)152855-Clip768_1.avi	wr	0.38	39.1	47
1068go	male	y	8	.\clips\16.4 wr(15.7_17.4)083227-Clip887_1.avi	wr	0.75	16.4	6
1068go	male	y	8	.\clips\50.3 nr(49.2_51.0)150252-Clip1226_1.avi	nr	1	50.3	57
1068go	male	y	8	.\clips\52.9 wr(52.8_53.0)133604-Clip632_1.avi	wr	0.5	52.9	56
1068go	male	y	8	.\clips\47.1 wr(46.3_48.0)081019-Clip258_1.avi	wr	0.38	47.1	55
1068go	male	y	8	.\clips\60.4 nr(60.3_60.5)153252-Clip328_1.avi	nr	0.75	60.4	54
1068go	male	y	8	.\clips\62.1 nr(61.0_62.8)150252-Clip1173_1.avi	nr	1	62.1	63
1068go	male	y	8	.\clips\50.9 nr(49.8_51.5)123137-Clip125_1.avi	nr	0.75	50.9	38
1068go	male	y	8	.\clips\18.3 nr(17.1_19.5)105713-Clip1203_1.avi	nr	1	18.3	15
1068go	male	y	8	.\clips\14.3 nr(13.7_15.0)085534-Clip62_1.avi	nr	0.38	14.3	16
1068go	male	y	8	.\clips\52.2 wr(51.9_52.5)153252-Clip78_1.avi	wr	1	52.2	57
1068go	male	y	8	.\clips\23.5 nr(22.4_24.3)135139-Clip64_1.avi	nr	0.5	23.5	18
1068go	male	y	8	.\clips\56.6 wr(55.5_57.4)133604-Clip593_1.avi	wr	0.75	56.6	57
1068go	male	y	8	.\clips\58.4 nr(58.0_58.9)123137-Clip817_1.avi	nr	0.5	58.4	59
1068go	male	y	8	.\clips\05.7 wr(04.8_07.4)123137-Clip521_1.avi	wr	0.5	5.7	5
1068go	male	y	8	.\clips\63.2 wr(63.0_63.4)084019-Clip250_1.avi	wr	1	63.2	59
1068go	male	y	8	.\clips\29.2 wr(28.3_30.3)085534-Clip1693_1.avi	wr	0.75	29.2	23
1068go	male	y	8	.\clips\37.3 wr(37.1_37.5)133604-Clip226_1.avi	wr	0.5	37.3	40
1068go	male	y	8	.\clips\20.4 wr(19.4_20.9)083227-Clip835_1.avi	wr	1	20.4	7
1068go	male	y	8	.\clips\59.6 nr(58.6_60.4)120137-Clip340_1.avi	nr	0.38	59.6	50
1068go	male	y	8	.\clips\21.1 wr(21.1_21.2)085534-Clip566_1.avi	wr	0.5	21.1	8
1068go	male	y	8	.\clips\34.5 nr(34.2_35.2)085700-Clip425_1.avi	nr	0.75	34.5	38
1068go	male	y	8	.\clips\14.4 wr(14.1_14.6)085534-Clip1201_1.avi	wr	0.38	14.4	9
1068go	male	y	8	.\clips\07.9 nr(05.9_09.2)110538-Clip209_1.avi	nr	0.38	7.9	7
1068go	male	y	8	.\clips\09.0 nr(09.0_09.1)100635-Clip169_1.avi	nr	0.75	9	7
1068go	male	y	8	.\clips\58.0 wr(57.6_58.3)121332-Clip284_1.avi	wr	1	58	60
1068go	male	y	8	.\clips\22.9 nr(22.1_23.8)085700-Clip395_1.avi	nr	1	22.9	18
1068go	male	y	8	.\clips\16.3 nr(15.4_17.1)120137-Clip186_1.avi	nr	0.5	16.3	18
1068go	male	y	8	.\clips\50.8 wr(50.1_51.5)153252-Clip83_1.avi	wr	0.5	50.8	59
1068go	male	y	8	.\clips\51.6 nr(50.8_52.2)150252-Clip1069_1.avi	nr	0.5	51.6	54
1068go	male	y	8	.\clips\56.0 nr(55.3_56.9)150252-Clip1298_1.avi	nr	0.75	56	45
1068go	male	y	8	.\clips\20.3 nr(19.9_21.3)091040-Clip98_1.avi	nr	0.75	20.3	22
1068go	male	y	8	.\clips\59.3 nr(57.9_60.6)085700-Clip892_1.avi	nr	0.75	59.3	52
1068go	male	y	8	.\clips\37.5 wr(36.8_38.3)152855-Clip1648_1.avi	wr	1	37.5	40
1068go	male	y	8	.\clips\47.3 nr(46.2_47.9)120137-Clip305_1.avi	nr	1	47.3	43
1068go	male	y	8	.\clips\45.9 nr(44.9_46.8)135139-Clip512_1.avi	nr	1	45.9	43
1068go	male	y	8	.\clips\38.7 wr(37.9_39.4)152855-Clip1643_1.avi	wr	0.75	38.7	34
1068go	male	y	8	.\clips\28.6 wr(27.8_29.7)085534-Clip1683_1.avi	wr	0.5	28.6	28
1068go	male	y	8	.\clips\16.7 wr(16.6_16.7)091040-Clip871_1.avi	wr	0.38	16.7	12
1068go	male	y	8	.\clips\26.6 nr(25.9_27.4)100334-Clip209_1.avi	nr	0.5	26.6	22
1068go	male	y	8	.\clips\48.8 wr(48.0_49.4)133604-Clip604_1.avi	wr	0.75	48.8	53
1068go	male	y	8	.\clips\49.5 nr(49.3_49.6)123137-Clip114_1.avi	nr	0.38	49.5	56
1068go	male	y	8	.\clips\16.5 wr(16.4_16.6)091040-Clip846_1.avi	wr	0.5	16.5	9
1068go	male	y	8	.\clips\25.4 nr(25.1_25.8)085700-Clip82_1.avi	nr	1	25.4	13
1068go	male	y	8	.\clips\24.8 nr(23.6_26.0)085534-Clip1440_1.avi	nr	0.38	24.8	26
1068go	male	y	8	.\clips\06.2 nr(05.7_07.5)132139-Clip249_1.avi	nr	0.5	6.2	12
1068go	male	y	8	.\clips\48.3 nr(47.7_48.9)152855-Clip623_1.avi	nr	0.5	48.3	54
1068go	male	y	8	.\clips\37.4 wr(36.9_38.0)133604-Clip287_1.avi	wr	0.38	37.4	50
1068go	male	y	8	.\clips\09.5 nr(08.7_10.3)105713-Clip169_1.avi	nr	0.38	9.5	15
1068go	male	y	8	.\clips\42.5 nr(42.1_42.9)085534-Clip201_1.avi	nr	0.38	42.5	40
1068go	male	y	8	.\clips\12.0 wr(11.6_12.9)083227-Clip770_1.avi	wr	0.38	12	7
1068go	male	y	8	.\clips\52.0 nr(51.7_52.3)123137-Clip130_1.avi	nr	0.38	52	53
1068go	male	y	8	.\clips\60.1 nr(60.0_60.2)153252-Clip333_1.avi	nr	1	60.1	52
1068go	male	y	8	.\clips\54.1 nr(53.2_54.6)123137-Clip151_1.avi	nr	0.75	54.1	49
1068go	male	y	8	.\clips\40.7 wr(40.2_41.0)152855-Clip763_1.avi	wr	1	40.7	40
1068go	male	y	8	.\clips\57.0 wr(56.6_57.4)085534-Clip524_1.avi	wr	0.38	57	58
1068go	male	y	8	.\clips\07.2 wr(06.2_08.0)085534-Clip953_1.avi	wr	1	7.2	5
1068go	male	y	8	.\clips\30.2 nr(29.6_31.2)171711-Clip306_1.avi	nr	1	30.2	12
1068go	male	y	8	.\clips\34.8 wr(34.6_35.3)135139-Clip224_1.avi	wr	0.75	34.8	42
1068go	male	y	8	.\clips\41.0 nr(40.9_41.2)085700-Clip949_1.avi	nr	0.75	41	43
1068go	male	y	8	.\clips\27.6 nr(27.1_28.1)085534-Clip325_1.avi	nr	1	27.6	30
1068go	male	y	8	.\clips\43.7 wr(42.8_44.2)133604-Clip344_1.avi	wr	1	43.7	48
1068go	male	y	8	.\clips\64.4 wr(63.5_65.0)153252-Clip237_1.avi	wr	0.38	64.4	63
1068go	male	y	8	.\clips\19.7 nr(19.5_19.9)120137-Clip224_1.avi	nr	0.38	19.7	18
1068go	male	y	8	.\clips\11.2 nr(09.7_12.8)083227-Clip345_1.avi	nr	0.75	11.2	14
1068go	male	y	8	.\clips\24.1 wr(23.4_24.8)123137-Clip25_1.avi	wr	0.38	24.1	22
1068go	male	y	8	.\clips\19.2 nr(18.2_19.9)100635-Clip1360_1.avi	nr	0.75	19.2	20
1068go	male	y	8	.\clips\11.3 nr(10.7_12.6)150252-Clip979_1.avi	nr	0.5	11.3	18
1068go	male	y	8	.\clips\08.2 nr(07.5_08.7)112540-Clip813_1.avi	nr	0.5	8.2	26
1068go	male	y	8	.\clips\15.8 nr(15.4_16.3)085534-Clip67_1.avi	nr	0.75	15.8	23
1068go	male	y	8	.\clips\21.6 nr(20.6_22.5)083227-Clip396_1.avi	nr	0.38	21.6	28
1068go	male	y	8	.\clips\09.0 wr(08.9_09.3)123137-Clip416_1.avi	wr	0.38	9	6
1068go	male	y	8	.\clips\27.5 wr(26.6_28.5)152855-Clip1626_1.avi	wr	1	27.5	35
1068go	male	y	8	.\clips\48.8 nr(47.1_49.7)123137-Clip252_1.avi	nr	0.75	48.8	45
1068go	male	y	8	.\clips\11.2 wr(10.4_11.8)083227-Clip1662_1.avi	wr	0.5	11.2	7
1068go	male	y	8	.\clips\40.5 nr(39.9_41.6)152855-Clip1773_1.avi	nr	1	40.5	42
1068go	male	y	8	.\clips\25.6 nr(25.4_25.9)085534-Clip315_1.avi	nr	0.75	25.6	26
1068go	male	y	8	.\clips\53.4 wr(53.1_53.7)133604-Clip637_1.avi	wr	0.75	53.4	50
1068go	male	y	8	.\clips\43.6 nr(43.0_44.2)152855-Clip679_1.avi	nr	0.75	43.6	54
1068go	male	y	8	.\clips\54.3 nr(53.2_54.7)123137-Clip841_1.avi	nr	0.38	54.3	57
1068go	male	y	8	.\clips\07.9 nr(07.0_08.8)143252-Clip406_1.avi	nr	1	7.9	8
1068go	male	y	8	.\clips\27.1 nr(26.4_28.2)085534-Clip330_1.avi	nr	0.38	27.1	28
1068go	male	y	8	.\clips\20.2 nr(19.4_21.3)110538-Clip1556_1.avi	nr	1	20.2	14
1875dt	male	y	20	.\clips\52.9 wr(52.8_53.0)133604-Clip632_1.avi	wr	1	52.9	45
1875dt	male	y	20	.\clips\43.0 wr(42.9_43.1)133604-Clip702_1.avi	wr	0.5	43	49
1875dt	male	y	20	.\clips\14.3 nr(13.7_15.0)085534-Clip62_1.avi	nr	0.38	14.3	10
1875dt	male	y	20	.\clips\16.4 wr(15.7_17.4)083227-Clip887_1.avi	wr	0.38	16.4	6
1875dt	male	y	20	.\clips\39.4 nr(39.1_39.9)135139-Clip356_1.avi	nr	0.38	39.4	39
1875dt	male	y	20	.\clips\05.7 wr(04.8_07.4)123137-Clip521_1.avi	wr	0.75	5.7	2
1875dt	male	y	20	.\clips\26.7 wr(25.7_27.6)132139-Clip1506_1.avi	wr	0.75	26.7	21
1875dt	male	y	20	.\clips\23.5 nr(22.4_24.3)135139-Clip64_1.avi	nr	1	23.5	8
1875dt	male	y	20	.\clips\33.8 wr(32.9_34.6)132139-Clip1225_1.avi	wr	1	33.8	27
1875dt	male	y	20	.\clips\50.8 wr(50.1_51.5)153252-Clip83_1.avi	wr	0.75	50.8	51
1875dt	male	y	20	.\clips\59.5 wr(59.3_59.8)083227-Clip695_1.avi	wr	1	59.5	49
1875dt	male	y	20	.\clips\55.0 wr(54.9_55.2)085534-Clip514_1.avi	wr	0.5	55	45
1875dt	male	y	20	.\clips\57.5 nr(57.1_58.0)120137-Clip335_1.avi	nr	0.5	57.5	45
1875dt	male	y	20	.\clips\29.2 wr(28.3_30.3)085534-Clip1693_1.avi	wr	1	29.2	15
1875dt	male	y	20	.\clips\61.7 nr(61.4_62.0)120137-Clip350_1.avi	nr	0.5	61.7	40
1875dt	male	y	20	.\clips\07.2 wr(06.2_08.0)085534-Clip953_1.avi	wr	0.75	7.2	2
1875dt	male	y	20	.\clips\21.1 nr(20.3_21.9)100635-Clip1355_1.avi	nr	0.75	21.1	17
1875dt	male	y	20	.\clips\59.6 nr(58.6_60.4)120137-Clip340_1.avi	nr	0.38	59.6	39
1875dt	male	y	20	.\clips\64.4 wr(63.5_65.0)153252-Clip237_1.avi	wr	0.38	64.4	53
1875dt	male	y	20	.\clips\43.4 nr(43.3_43.5)132139-Clip575_1.avi	nr	1	43.4	36
1875dt	male	y	20	.\clips\21.3 wr(21.2_21.5)085534-Clip728_1.avi	wr	0.75	21.3	4
1875dt	male	y	20	.\clips\25.6 nr(25.4_25.9)085534-Clip315_1.avi	nr	0.38	25.6	14
1875dt	male	y	20	.\clips\31.5 wr(31.3_31.9)085534-Clip835_1.avi	wr	0.38	31.5	19
1875dt	male	y	20	.\clips\26.5 wr(26.3_26.7)083227-Clip576_1.avi	wr	0.38	26.5	14
1875dt	male	y	20	.\clips\58.4 nr(58.0_58.9)123137-Clip817_1.avi	nr	1	58.4	39
1875dt	male	y	20	.\clips\34.9 wr(33.9_35.9)132139-Clip1263_1.avi	wr	0.38	34.9	30
1875dt	male	y	20	.\clips\37.3 wr(37.1_37.5)133604-Clip226_1.avi	wr	0.75	37.3	39
1875dt	male	y	20	.\clips\27.6 nr(27.1_28.1)085534-Clip325_1.avi	nr	0.75	27.6	18
1875dt	male	y	20	.\clips\46.2 wr(45.7_46.8)083227-Clip606_1.avi	wr	0.38	46.2	46
1875dt	male	y	20	.\clips\53.3 nr(53.1_53.8)150252-Clip1283_1.avi	nr	1	53.3	44
1875dt	male	y	20	.\clips\05.3 wr(03.9_06.0)123137-Clip456_1.avi	wr	0.5	5.3	1
1875dt	male	y	20	.\clips\43.6 nr(43.0_44.2)152855-Clip679_1.avi	nr	1	43.6	39
1875dt	male	y	20	.\clips\32.5 wr(32.3_32.6)085534-Clip840_1.avi	wr	0.5	32.5	19
1875dt	male	y	20	.\clips\51.6 nr(50.8_52.2)150252-Clip1069_1.avi	nr	0.75	51.6	45
1875dt	male	y	20	.\clips\62.1 nr(61.0_62.8)150252-Clip1173_1.avi	nr	0.75	62.1	54
1875dt	male	y	20	.\clips\10.1 nr(09.2_11.6)152855-Clip352_1.avi	nr	0.5	10.1	4
1875dt	male	y	20	.\clips\62.8 nr(62.7_62.8)150252-Clip1178_1.avi	nr	0.38	62.8	54
1875dt	male	y	20	.\clips\59.3 nr(57.9_60.6)085700-Clip892_1.avi	nr	1	59.3	51
1875dt	male	y	20	.\clips\36.4 wr(35.8_37.4)152855-Clip1501_1.avi	wr	0.38	36.4	30
1875dt	male	y	20	.\clips\16.8 nr(15.8_17.8)100635-Clip1253_1.avi	nr	0.5	16.8	20
1875dt	male	y	20	.\clips\54.3 nr(53.2_54.7)123137-Clip841_1.avi	nr	0.38	54.3	44
1875dt	male	y	20	.\clips\37.5 wr(36.8_38.3)152855-Clip1648_1.avi	wr	0.75	37.5	33
1875dt	male	y	20	.\clips\13.9 nr(13.1_14.6)105713-Clip1229_1.avi	nr	1	13.9	6
1875dt	male	y	20	.\clips\50.5 wr(50.4_50.7)150252-Clip1099_1.avi	wr	0.38	50.5	54
1875dt	male	y	20	.\clips\54.8 wr(54.2_55.5)133604-Clip622_1.avi	wr	0.38	54.8	54
1875dt	male	y	20	.\clips\61.3 wr(60.9_62.3)100334-Clip590_1.avi	wr	0.75	61.3	54
1875dt	male	y	20	.\clips\38.6 nr(37.6_39.2)123137-Clip84_1.avi	nr	1	38.6	36
1875dt	male	y	20	.\clips\09.5 nr(08.7_10.3)105713-Clip169_1.avi	nr	0.38	9.5	5
1875dt	male	y	20	.\clips\17.9 wr(17.8_18.0)085534-Clip713_1.avi	wr	0.75	17.9	6
1875dt	male	y	20	.\clips\28.6 nr(27.5_29.1)100334-Clip125_1.avi	nr	1	28.6	20
1875dt	male	y	20	.\clips\54.1 nr(53.2_54.6)123137-Clip151_1.avi	nr	1	54.1	43
1875dt	male	y	20	.\clips\60.6 wr(60.4_60.7)083227-Clip649_1.avi	wr	0.38	60.6	54
1875dt	male	y	20	.\clips\05.5 wr(04.6_07.1)123137-Clip474_1.avi	wr	0.38	5.5	2
1875dt	male	y	20	.\clips\31.4 wr(30.9_32.1)085534-Clip1698_1.avi	wr	0.5	31.4	32
1875dt	male	y	20	.\clips\15.7 wr(15.6_15.8)085700-Clip1447_1.avi	wr	0.5	15.7	3
1875dt	male	y	20	.\clips\27.2 wr(26.2_27.9)085534-Clip976_1.avi	wr	0.5	27.2	17
1875dt	male	y	20	.\clips\18.0 wr(17.9_18.1)085700-Clip1468_1.avi	wr	1	18	5
1875dt	male	y	20	.\clips\50.0 wr(49.4_51.1)084019-Clip273_1.avi	wr	0.5	50	54
1875dt	male	y	20	.\clips\20.4 wr(19.4_20.9)083227-Clip835_1.avi	wr	0.5	20.4	8
1875dt	male	y	20	.\clips\14.4 wr(14.1_14.6)085534-Clip1201_1.avi	wr	0.38	14.4	9
1875dt	male	y	20	.\clips\38.7 wr(37.9_39.4)152855-Clip1643_1.avi	wr	1	38.7	30
1875dt	male	y	20	.\clips\60.1 nr(60.0_60.2)153252-Clip333_1.avi	nr	0.5	60.1	56
1875dt	male	y	20	.\clips\43.8 wr(43.1_44.3)133604-Clip697_1.avi	wr	1	43.8	55
1875dt	male	y	20	.\clips\40.7 wr(40.2_41.0)152855-Clip763_1.avi	wr	0.5	40.7	36
1875dt	male	y	20	.\clips\46.7 nr(45.7_47.5)123137-Clip913_1.avi	nr	0.38	46.7	40
1875dt	male	y	20	.\clips\16.7 wr(16.6_16.7)091040-Clip871_1.avi	wr	0.5	16.7	5
1875dt	male	y	20	.\clips\25.4 nr(25.1_25.8)085700-Clip82_1.avi	nr	0.5	25.4	16
1875dt	male	y	20	.\clips\06.2 nr(05.7_07.5)132139-Clip249_1.avi	nr	0.75	6.2	1
1875dt	male	y	20	.\clips\28.6 wr(27.8_29.7)085534-Clip1683_1.avi	wr	1	28.6	20
1875dt	male	y	20	.\clips\52.0 nr(51.7_52.3)123137-Clip130_1.avi	nr	0.5	52	39
1875dt	male	y	20	.\clips\08.8 wr(07.6_10.5)083227-Clip1657_1.avi	wr	1	8.8	1
1875dt	male	y	20	.\clips\33.4 wr(32.8_34.4)132139-Clip1257_1.avi	wr	0.75	33.4	30
1875dt	male	y	20	.\clips\29.7 wr(29.4_30.0)152855-Clip1053_1.avi	wr	0.38	29.7	24
1875dt	male	y	20	.\clips\47.8 wr(47.0_48.9)083227-Clip611_1.avi	wr	0.75	47.8	45
1875dt	male	y	20	.\clips\52.2 wr(51.9_52.5)153252-Clip78_1.avi	wr	0.75	52.2	55
1875dt	male	y	20	.\clips\47.3 nr(46.2_47.9)120137-Clip305_1.avi	nr	0.75	47.3	39
1875dt	male	y	20	.\clips\18.3 nr(17.1_19.5)105713-Clip1203_1.avi	nr	0.75	18.3	10
1875dt	male	y	20	.\clips\44.6 wr(44.1_45.2)083227-Clip601_1.avi	wr	0.38	44.6	41
1875dt	male	y	20	.\clips\39.1 wr(38.8_39.7)152855-Clip768_1.avi	wr	0.38	39.1	40
1875dt	male	y	20	.\clips\63.9 wr(62.9_64.5)100334-Clip596_1.avi	wr	1	63.9	55
1875dt	male	y	20	.\clips\58.4 wr(57.6_58.9)153252-Clip21_1.avi	wr	1	58.4	54
1875dt	male	y	20	.\clips\32.1 wr(31.2_32.9)085534-Clip820_1.avi	wr	0.75	32.1	21
1875dt	male	y	20	.\clips\18.5 wr(17.9_19.2)085534-Clip718_1.avi	wr	1	18.5	5
1875dt	male	y	20	.\clips\21.8 wr(21.7_22.0)085534-Clip1048_1.avi	wr	1	21.8	10
1875dt	male	y	20	.\clips\08.4 wr(08.4_08.5)083227-Clip1722_1.avi	wr	1	8.4	4
1875dt	male	y	20	.\clips\08.2 nr(07.5_08.7)112540-Clip813_1.avi	nr	1	8.2	7
1875dt	male	y	20	.\clips\42.0 wr(41.7_42.3)133604-Clip349_1.avi	wr	0.75	42	53
1875dt	male	y	20	.\clips\60.9 nr(60.6_61.2)120137-Clip345_1.avi	nr	0.75	60.9	42
1875dt	male	y	20	.\clips\40.5 nr(39.9_41.6)152855-Clip1773_1.avi	nr	0.5	40.5	42
1875dt	male	y	20	.\clips\36.0 nr(35.3_36.5)132139-Clip720_1.avi	nr	0.38	36	40
1875dt	male	y	20	.\clips\60.0 wr(58.9_60.7)083227-Clip644_1.avi	wr	0.5	60	54
1875dt	male	y	20	.\clips\11.7 nr(11.2_11.8)105713-Clip158_1.avi	nr	0.5	11.7	4
1875dt	male	y	20	.\clips\43.7 wr(42.8_44.2)133604-Clip344_1.avi	wr	0.75	43.7	45
1875dt	male	y	20	.\clips\25.0 wr(23.9_25.8)085534-Clip809_1.avi	wr	0.5	25	14
1875dt	male	y	20	.\clips\48.3 nr(47.7_48.9)152855-Clip623_1.avi	nr	1	48.3	39
1875dt	male	y	20	.\clips\57.0 wr(56.6_57.4)085534-Clip524_1.avi	wr	0.5	57	53
1875dt	male	y	20	.\clips\59.7 wr(59.6_60.0)084019-Clip115_1.avi	wr	0.38	59.7	54
1875dt	male	y	20	.\clips\37.4 wr(36.9_38.0)133604-Clip287_1.avi	wr	0.5	37.4	37
1875dt	male	y	20	.\clips\05.4 nr(04.7_06.1)103635-Clip535_1.avi	nr	0.5	5.4	5
1875dt	male	y	20	.\clips\38.0 nr(37.3_39.0)135139-Clip366_1.avi	nr	0.5	38	42
1875dt	male	y	20	.\clips\39.0 nr(38.9_39.2)135139-Clip341_1.avi	nr	1	39	37
1875dt	male	y	20	.\clips\33.2 nr(32.9_33.5)112540-Clip1725_1.avi	nr	1	33.2	25
1875dt	male	y	20	.\clips\48.5 wr(48.0_48.8)084019-Clip384_1.avi	wr	1	48.5	54
1875dt	male	y	20	.\clips\23.9 nr(23.3_24.4)132139-Clip503_1.avi	nr	1	23.9	18
1875dt	male	y	20	.\clips\24.8 nr(23.6_26.0)085534-Clip1440_1.avi	nr	0.38	24.8	20
1875dt	male	y	20	.\clips\27.5 wr(26.6_28.5)152855-Clip1626_1.avi	wr	0.75	27.5	30
1875dt	male	y	20	.\clips\38.2 nr(37.5_38.8)113538-Clip75_1.avi	nr	0.75	38.2	24
1875dt	male	y	20	.\clips\21.1 wr(21.1_21.2)085534-Clip566_1.avi	wr	0.75	21.1	10
1875dt	male	y	20	.\clips\42.5 nr(42.1_42.9)085534-Clip201_1.avi	nr	0.5	42.5	32
1875dt	male	y	20	.\clips\29.5 nr(29.4_29.6)085534-Clip146_1.avi	nr	0.38	29.5	28
1875dt	male	y	20	.\clips\14.0 nr(12.1_15.5)132139-Clip189_1.avi	nr	1	14	8
1875dt	male	y	20	.\clips\35.7 nr(35.4_35.9)085700-Clip171_1.avi	nr	0.5	35.7	34
1875dt	male	y	20	.\clips\16.3 nr(15.4_17.1)120137-Clip186_1.avi	nr	0.75	16.3	10
1875dt	male	y	20	.\clips\21.2 wr(20.3_21.6)085534-Clip723_1.avi	wr	0.5	21.2	8
1875dt	male	y	20	.\clips\18.6 nr(18.1_19.2)110538-Clip1333_1.avi	nr	1	18.6	12
1875dt	male	y	20	.\clips\05.5 nr(04.5_06.5)150252-Clip1005_1.avi	nr	0.38	5.5	7
1875dt	male	y	20	.\clips\51.5 wr(51.2_51.8)153252-Clip73_1.avi	wr	0.5	51.5	61
1875dt	male	y	20	.\clips\20.2 nr(19.4_21.3)110538-Clip1556_1.avi	nr	0.5	20.2	16
1875dt	male	y	20	.\clips\41.0 nr(40.9_41.2)085700-Clip949_1.avi	nr	0.38	41	46
1875dt	male	y	20	.\clips\49.1 wr(48.3_50.0)081019-Clip263_1.avi	wr	0.38	49.1	55
1875dt	male	y	20	.\clips\41.7 wr(40.4_42.4)083227-Clip591_1.avi	wr	0.38	41.7	48
1875dt	male	y	20	.\clips\28.3 nr(27.8_29.3)100334-Clip236_1.avi	nr	1	28.3	24
1875dt	male	y	20	.\clips\34.5 nr(34.2_35.2)085700-Clip425_1.avi	nr	1	34.5	30
1875dt	male	y	20	.\clips\50.9 nr(49.8_51.5)123137-Clip125_1.avi	nr	0.38	50.9	44
1875dt	male	y	20	.\clips\55.4 nr(54.6_56.4)120137-Clip325_1.avi	nr	0.5	55.4	44
1875dt	male	y	20	.\clips\58.0 wr(57.6_58.3)121332-Clip284_1.avi	wr	0.75	58	55
1875dt	male	y	20	.\clips\52.7 nr(52.4_53.1)123137-Clip135_1.avi	nr	0.75	52.7	39
1875dt	male	y	20	.\clips\60.4 nr(60.3_60.5)153252-Clip328_1.avi	nr	0.38	60.4	54
1875dt	male	y	20	.\clips\64.2 wr(63.1_64.8)153252-Clip211_1.avi	wr	1	64.2	54
1875dt	male	y	20	.\clips\57.3 nr(56.8_57.5)150252-Clip1157_1.avi	nr	0.75	57.3	54
1875dt	male	y	20	.\clips\53.4 wr(53.1_53.7)133604-Clip637_1.avi	wr	1	53.4	45
1875dt	male	y	20	.\clips\43.1 nr(42.3_43.7)132139-Clip654_1.avi	nr	0.75	43.1	39
1875dt	male	y	20	.\clips\34.9 nr(34.4_35.8)085700-Clip430_1.avi	nr	0.38	34.9	31
1875dt	male	y	20	.\clips\56.0 nr(55.3_56.9)150252-Clip1298_1.avi	nr	0.38	56	48
1875dt	male	y	20	.\clips\20.8 wr(20.1_21.5)085534-Clip586_1.avi	wr	0.38	20.8	9
1875dt	male	y	20	.\clips\15.8 nr(15.4_16.3)085534-Clip67_1.avi	nr	0.38	15.8	6
1875dt	male	y	20	.\clips\46.7 wr(45.5_47.4)085534-Clip474_1.avi	wr	0.75	46.7	49
1875dt	male	y	20	.\clips\49.5 nr(49.3_49.6)123137-Clip114_1.avi	nr	0.38	49.5	44
1875dt	male	y	20	.\clips\56.7 wr(55.7_57.3)153252-Clip16_1.avi	wr	0.75	56.7	55
1875dt	male	y	20	.\clips\31.6 nr(30.6_32.5)135139-Clip51_1.avi	nr	0.5	31.6	29
1875dt	male	y	20	.\clips\26.6 nr(25.9_27.4)100334-Clip209_1.avi	nr	0.75	26.6	19
1875dt	male	y	20	.\clips\16.5 wr(16.4_16.6)091040-Clip846_1.avi	wr	0.75	16.5	4
1875dt	male	y	20	.\clips\15.3 nr(14.7_16.3)105713-Clip1198_1.avi	nr	0.5	15.3	7
1875dt	male	y	20	.\clips\11.2 wr(10.4_11.8)083227-Clip1662_1.avi	wr	0.75	11.2	4
1875dt	male	y	20	.\clips\20.3 nr(19.9_21.3)091040-Clip98_1.avi	nr	0.38	20.3	14
1875dt	male	y	20	.\clips\24.1 wr(23.4_24.8)123137-Clip25_1.avi	wr	0.38	24.1	24
1875dt	male	y	20	.\clips\57.5 nr(57.2_57.7)123137-Clip812_1.avi	nr	0.75	57.5	38
1875dt	male	y	20	.\clips\11.3 nr(10.7_12.6)150252-Clip979_1.avi	nr	0.75	11.3	10
1875dt	male	y	20	.\clips\13.6 wr(13.4_13.9)085534-Clip1206_1.avi	wr	1	13.6	6
1875dt	male	y	20	.\clips\48.8 wr(48.0_49.4)133604-Clip604_1.avi	wr	1	48.8	54
1875dt	male	y	20	.\clips\07.9 nr(05.9_09.2)110538-Clip209_1.avi	nr	0.5	7.9	5
1875dt	male	y	20	.\clips\35.5 wr(34.6_36.1)085534-Clip1586_1.avi	wr	0.5	35.5	30
1875dt	male	y	20	.\clips\62.7 nr(62.6_62.7)150252-Clip1183_1.avi	nr	1	62.7	55
1875dt	male	y	20	.\clips\19.7 nr(19.5_19.9)120137-Clip224_1.avi	nr	0.38	19.7	19
1875dt	male	y	20	.\clips\06.5 wr(05.5_08.1)083227-Clip1674_1.avi	wr	0.5	6.5	3
1875dt	male	y	20	.\clips\12.9 wr(12.2_13.2)085534-Clip1211_1.avi	wr	1	12.9	3
1875dt	male	y	20	.\clips\07.9 nr(07.0_08.8)143252-Clip406_1.avi	nr	0.75	7.9	6
1875dt	male	y	20	.\clips\56.6 wr(55.5_57.4)133604-Clip593_1.avi	wr	0.38	56.6	60
1875dt	male	y	20	.\clips\32.3 nr(32.1_32.3)085534-Clip1305_1.avi	nr	0.75	32.3	30
1875dt	male	y	20	.\clips\38.1 wr(38.0_38.3)152855-Clip798_1.avi	wr	1	38.1	33
1875dt	male	y	20	.\clips\37.1 nr(36.9_37.3)152855-Clip575_1.avi	nr	0.75	37.1	35
1875dt	male	y	20	.\clips\44.0 wr(42.9_44.5)121332-Clip257_1.avi	wr	1	44	35
1875dt	male	y	20	.\clips\22.9 nr(22.1_23.8)085700-Clip395_1.avi	nr	0.75	22.9	26
1875dt	male	y	20	.\clips\47.1 wr(46.3_48.0)081019-Clip258_1.avi	wr	0.5	47.1	45
1875dt	male	y	20	.\clips\31.2 nr(30.4_31.4)135139-Clip74_1.avi	nr	0.75	31.2	23
1875dt	male	y	20	.\clips\34.8 wr(34.6_35.3)135139-Clip224_1.avi	wr	1	34.8	30
1875dt	male	y	20	.\clips\62.1 nr(61.6_62.3)084019-Clip180_1.avi	nr	1	62.1	46
1875dt	male	y	20	.\clips\19.1 wr(18.4_19.8)085534-Clip591_1.avi	wr	0.38	19.1	6
1875dt	male	y	20	.\clips\63.2 wr(63.0_63.4)084019-Clip250_1.avi	wr	0.75	63.2	59
1875dt	male	y	20	.\clips\50.3 nr(49.2_51.0)150252-Clip1226_1.avi	nr	0.5	50.3	56
1875dt	male	y	20	.\clips\13.8 nr(13.3_14.3)083227-Clip367_1.avi	nr	0.75	13.8	8
1875dt	male	y	20	.\clips\47.2 nr(46.9_47.5)123137-Clip163_1.avi	nr	0.5	47.2	44
1875dt	male	y	20	.\clips\22.4 wr(21.3_23.3)085534-Clip804_1.avi	wr	1	22.4	6
1875dt	male	y	20	.\clips\62.5 wr(61.9_63.3)100334-Clip649_1.avi	wr	0.5	62.5	53
1875dt	male	y	20	.\clips\10.8 wr(09.9_11.8)083227-Clip1336_1.avi	wr	0.5	10.8	4
1875dt	male	y	20	.\clips\12.0 wr(11.6_12.9)083227-Clip770_1.avi	wr	0.5	12	4
1875dt	male	y	20	.\clips\09.0 wr(08.9_09.3)123137-Clip416_1.avi	wr	0.38	9	5
1875dt	male	y	20	.\clips\11.2 nr(09.7_12.8)083227-Clip345_1.avi	nr	0.38	11.2	5
1875dt	male	y	20	.\clips\27.1 nr(26.4_28.2)085534-Clip330_1.avi	nr	0.5	27.1	26
1875dt	male	y	20	.\clips\30.4 nr(29.3_31.2)100334-Clip182_1.avi	nr	0.38	30.4	29
1875dt	male	y	20	.\clips\45.9 nr(44.9_46.8)135139-Clip512_1.avi	nr	0.5	45.9	39
1875dt	male	y	20	.\clips\30.2 nr(29.6_31.2)171711-Clip306_1.avi	nr	0.5	30.2	22
1875dt	male	y	20	.\clips\48.8 nr(47.1_49.7)123137-Clip252_1.avi	nr	1	48.8	36
1875dt	male	y	20	.\clips\12.3 wr(11.2_13.1)085534-Clip1099_1.avi	wr	0.75	12.3	4
1875dt	male	y	20	.\clips\45.7 wr(44.8_46.5)133604-Clip692_1.avi	wr	0.5	45.7	54
1875dt	male	y	20	.\clips\19.2 nr(18.2_19.9)100635-Clip1360_1.avi	nr	1	19.2	10
1875dt	male	y	20	.\clips\44.8 nr(44.0_45.5)152855-Clip648_1.avi	nr	0.38	44.8	39
1875dt	male	y	20	.\clips\10.9 wr(10.4_11.5)091040-Clip1582_1.avi	wr	0.38	10.9	5
1875dt	male	y	20	.\clips\46.7 nr(46.6_46.8)152855-Clip725_1.avi	nr	0.75	46.7	45
1875dt	male	y	20	.\clips\09.0 nr(09.0_09.1)100635-Clip169_1.avi	nr	1	9	3
1875dt	male	y	20	.\clips\21.6 nr(20.6_22.5)083227-Clip396_1.avi	nr	0.5	21.6	13
1875dt	male	y	20	.\clips\41.9 nr(41.5_42.3)123137-Clip901_1.avi	nr	0.75	41.9	34
2025es	female	n	0	.\clips\51.5 wr(51.2_51.8)153252-Clip73_1.avi	wr	0.5	51.5	39
2025es	female	n	0	.\clips\60.6 wr(60.4_60.7)083227-Clip649_1.avi	wr	1	60.6	38
2025es	female	n	0	.\clips\59.5 wr(59.3_59.8)083227-Clip695_1.avi	wr	1	59.5	48
2025es	female	n	0	.\clips\50.9 nr(49.8_51.5)123137-Clip125_1.avi	nr	1	50.9	69
2025es	female	n	0	.\clips\20.3 nr(19.9_21.3)091040-Clip98_1.avi	nr	1	20.3	44
2025es	female	n	0	.\clips\44.6 wr(44.1_45.2)083227-Clip601_1.avi	wr	0.75	44.6	44
2025es	female	n	0	.\clips\55.0 wr(54.9_55.2)085534-Clip514_1.avi	wr	0.38	55	43
2025es	female	n	0	.\clips\54.3 nr(53.2_54.7)123137-Clip841_1.avi	nr	0.75	54.3	63
2025es	female	n	0	.\clips\33.4 wr(32.8_34.4)132139-Clip1257_1.avi	wr	0.38	33.4	41
2025es	female	n	0	.\clips\49.1 wr(48.3_50.0)081019-Clip263_1.avi	wr	0.75	49.1	48
2025es	female	n	0	.\clips\53.4 wr(53.1_53.7)133604-Clip637_1.avi	wr	1	53.4	78
2025es	female	n	0	.\clips\16.5 wr(16.4_16.6)091040-Clip846_1.avi	wr	0.75	16.5	23
2025es	female	n	0	.\clips\62.1 nr(61.0_62.8)150252-Clip1173_1.avi	nr	0.38	62.1	59
2025es	female	n	0	.\clips\38.6 nr(37.6_39.2)123137-Clip84_1.avi	nr	0.5	38.6	39
2025es	female	n	0	.\clips\05.7 wr(04.8_07.4)123137-Clip521_1.avi	wr	0.75	5.7	13
2025es	female	n	0	.\clips\30.2 nr(29.6_31.2)171711-Clip306_1.avi	nr	0.38	30.2	22
2025es	female	n	0	.\clips\18.6 nr(18.1_19.2)110538-Clip1333_1.avi	nr	0.5	18.6	29
2025es	female	n	0	.\clips\12.0 wr(11.6_12.9)083227-Clip770_1.avi	wr	0.5	12	18
2025es	female	n	0	.\clips\07.9 nr(05.9_09.2)110538-Clip209_1.avi	nr	0.5	7.9	16
2025es	female	n	0	.\clips\36.0 nr(35.3_36.5)132139-Clip720_1.avi	nr	1	36	49
2025es	female	n	0	.\clips\34.9 nr(34.4_35.8)085700-Clip430_1.avi	nr	0.75	34.9	28
2025es	female	n	0	.\clips\21.8 wr(21.7_22.0)085534-Clip1048_1.avi	wr	0.5	21.8	17
2025es	female	n	0	.\clips\43.7 wr(42.8_44.2)133604-Clip344_1.avi	wr	0.38	43.7	26
2025es	female	n	0	.\clips\21.2 wr(20.3_21.6)085534-Clip723_1.avi	wr	0.5	21.2	13
2025es	female	n	0	.\clips\11.7 nr(11.2_11.8)105713-Clip158_1.avi	nr	0.5	11.7	16
2025es	female	n	0	.\clips\16.8 nr(15.8_17.8)100635-Clip1253_1.avi	nr	0.5	16.8	20
2025es	female	n	0	.\clips\25.4 nr(25.1_25.8)085700-Clip82_1.avi	nr	0.38	25.4	37
2025es	female	n	0	.\clips\50.5 wr(50.4_50.7)150252-Clip1099_1.avi	wr	1	50.5	50
2025es	female	n	0	.\clips\28.6 wr(27.8_29.7)085534-Clip1683_1.avi	wr	0.5	28.6	22
2025es	female	n	0	.\clips\23.9 nr(23.3_24.4)132139-Clip503_1.avi	nr	1	23.9	39
2025es	female	n	0	.\clips\63.9 wr(62.9_64.5)100334-Clip596_1.avi	wr	0.5	63.9	19
2025es	female	n	0	.\clips\08.2 nr(07.5_08.7)112540-Clip813_1.avi	nr	0.5	8.2	19
2025es	female	n	0	.\clips\34.5 nr(34.2_35.2)085700-Clip425_1.avi	nr	1	34.5	29
2025es	female	n	0	.\clips\52.0 nr(51.7_52.3)123137-Clip130_1.avi	nr	0.5	52	59
2025es	female	n	0	.\clips\20.4 wr(19.4_20.9)083227-Clip835_1.avi	wr	0.38	20.4	16
2025es	female	n	0	.\clips\13.6 wr(13.4_13.9)085534-Clip1206_1.avi	wr	1	13.6	16
2025es	female	n	0	.\clips\58.0 wr(57.6_58.3)121332-Clip284_1.avi	wr	0.38	58	19
2025es	female	n	0	.\clips\43.0 wr(42.9_43.1)133604-Clip702_1.avi	wr	0.5	43	20
2025es	female	n	0	.\clips\57.0 wr(56.6_57.4)085534-Clip524_1.avi	wr	0.5	57	38
2025es	female	n	0	.\clips\58.4 nr(58.0_58.9)123137-Clip817_1.avi	nr	0.5	58.4	50
2025es	female	n	0	.\clips\62.5 wr(61.9_63.3)100334-Clip649_1.avi	wr	0.5	62.5	58
2025es	female	n	0	.\clips\62.7 nr(62.6_62.7)150252-Clip1183_1.avi	nr	1	62.7	69
2025es	female	n	0	.\clips\47.2 nr(46.9_47.5)123137-Clip163_1.avi	nr	0.5	47.2	29
2025es	female	n	0	.\clips\47.3 nr(46.2_47.9)120137-Clip305_1.avi	nr	0.38	47.3	24
2025es	female	n	0	.\clips\06.5 wr(05.5_08.1)083227-Clip1674_1.avi	wr	0.5	6.5	18
2025es	female	n	0	.\clips\34.8 wr(34.6_35.3)135139-Clip224_1.avi	wr	1	34.8	15
2025es	female	n	0	.\clips\64.2 wr(63.1_64.8)153252-Clip211_1.avi	wr	1	64.2	17
2025es	female	n	0	.\clips\22.4 wr(21.3_23.3)085534-Clip804_1.avi	wr	1	22.4	18
2025es	female	n	0	.\clips\62.1 nr(61.6_62.3)084019-Clip180_1.avi	nr	0.5	62.1	49
2025es	female	n	0	.\clips\48.5 wr(48.0_48.8)084019-Clip384_1.avi	wr	0.5	48.5	49
2025es	female	n	0	.\clips\27.2 wr(26.2_27.9)085534-Clip976_1.avi	wr	0.5	27.2	9
2025es	female	n	0	.\clips\43.8 wr(43.1_44.3)133604-Clip697_1.avi	wr	0.5	43.8	69
2025es	female	n	0	.\clips\62.8 nr(62.7_62.8)150252-Clip1178_1.avi	nr	0.75	62.8	68
2025es	female	n	0	.\clips\61.7 nr(61.4_62.0)120137-Clip350_1.avi	nr	0.5	61.7	54
2025es	female	n	0	.\clips\46.2 wr(45.7_46.8)083227-Clip606_1.avi	wr	1	46.2	44
2025es	female	n	0	.\clips\31.2 nr(30.4_31.4)135139-Clip74_1.avi	nr	0.75	31.2	34
2025es	female	n	0	.\clips\21.6 nr(20.6_22.5)083227-Clip396_1.avi	nr	0.5	21.6	19
2025es	female	n	0	.\clips\36.4 wr(35.8_37.4)152855-Clip1501_1.avi	wr	1	36.4	29
2025es	female	n	0	.\clips\43.6 nr(43.0_44.2)152855-Clip679_1.avi	nr	1	43.6	19
2025es	female	n	0	.\clips\05.5 nr(04.5_06.5)150252-Clip1005_1.avi	nr	1	5.5	9
2025es	female	n	0	.\clips\18.5 wr(17.9_19.2)085534-Clip718_1.avi	wr	1	18.5	10
2025es	female	n	0	.\clips\12.9 wr(12.2_13.2)085534-Clip1211_1.avi	wr	0.5	12.9	11
2025es	female	n	0	.\clips\32.5 wr(32.3_32.6)085534-Clip840_1.avi	wr	0.5	32.5	13
2025es	female	n	0	.\clips\13.8 nr(13.3_14.3)083227-Clip367_1.avi	nr	0.38	13.8	9
2025es	female	n	0	.\clips\46.7 nr(45.7_47.5)123137-Clip913_1.avi	nr	1	46.7	48
2025es	female	n	0	.\clips\47.8 wr(47.0_48.9)083227-Clip611_1.avi	wr	0.38	47.8	34
2025es	female	n	0	.\clips\49.5 nr(49.3_49.6)123137-Clip114_1.avi	nr	0.75	49.5	25
2025es	female	n	0	.\clips\11.2 nr(09.7_12.8)083227-Clip345_1.avi	nr	1	11.2	9
2025es	female	n	0	.\clips\21.1 wr(21.1_21.2)085534-Clip566_1.avi	wr	0.75	21.1	9
2025es	female	n	0	.\clips\64.4 wr(63.5_65.0)153252-Clip237_1.avi	wr	0.75	64.4	39
2025es	female	n	0	.\clips\43.1 nr(42.3_43.7)132139-Clip654_1.avi	nr	0.38	43.1	58
2025es	female	n	0	.\clips\38.0 nr(37.3_39.0)135139-Clip366_1.avi	nr	0.5	38	58
2025es	female	n	0	.\clips\16.3 nr(15.4_17.1)120137-Clip186_1.avi	nr	0.75	16.3	19
2025es	female	n	0	.\clips\17.9 wr(17.8_18.0)085534-Clip713_1.avi	wr	0.38	17.9	19
2025es	female	n	0	.\clips\44.0 wr(42.9_44.5)121332-Clip257_1.avi	wr	1	44	15
2025es	female	n	0	.\clips\38.7 wr(37.9_39.4)152855-Clip1643_1.avi	wr	1	38.7	29
2025es	female	n	0	.\clips\33.2 nr(32.9_33.5)112540-Clip1725_1.avi	nr	0.5	33.2	33
2025es	female	n	0	.\clips\50.3 nr(49.2_51.0)150252-Clip1226_1.avi	nr	0.38	50.3	29
2025es	female	n	0	.\clips\18.3 nr(17.1_19.5)105713-Clip1203_1.avi	nr	0.38	18.3	25
2025es	female	n	0	.\clips\45.7 wr(44.8_46.5)133604-Clip692_1.avi	wr	0.38	45.7	49
2025es	female	n	0	.\clips\22.9 nr(22.1_23.8)085700-Clip395_1.avi	nr	0.38	22.9	20
2025es	female	n	0	.\clips\14.0 nr(12.1_15.5)132139-Clip189_1.avi	nr	1	14	11
2025es	female	n	0	.\clips\54.1 nr(53.2_54.6)123137-Clip151_1.avi	nr	1	54.1	29
2025es	female	n	0	.\clips\42.0 wr(41.7_42.3)133604-Clip349_1.avi	wr	0.75	42	29
2025es	female	n	0	.\clips\56.0 nr(55.3_56.9)150252-Clip1298_1.avi	nr	1	56	39
2025es	female	n	0	.\clips\24.8 nr(23.6_26.0)085534-Clip1440_1.avi	nr	0.75	24.8	20
2025es	female	n	0	.\clips\06.2 nr(05.7_07.5)132139-Clip249_1.avi	nr	0.75	6.2	8
2025es	female	n	0	.\clips\31.5 wr(31.3_31.9)085534-Clip835_1.avi	wr	1	31.5	24
2025es	female	n	0	.\clips\05.4 nr(04.7_06.1)103635-Clip535_1.avi	nr	0.38	5.4	19
2025es	female	n	0	.\clips\54.8 wr(54.2_55.5)133604-Clip622_1.avi	wr	0.75	54.8	69
2025es	female	n	0	.\clips\48.8 nr(47.1_49.7)123137-Clip252_1.avi	nr	1	48.8	48
2025es	female	n	0	.\clips\20.8 wr(20.1_21.5)085534-Clip586_1.avi	wr	1	20.8	12
2025es	female	n	0	.\clips\61.3 wr(60.9_62.3)100334-Clip590_1.avi	wr	0.75	61.3	59
2025es	female	n	0	.\clips\52.9 wr(52.8_53.0)133604-Clip632_1.avi	wr	0.5	52.9	69
2025es	female	n	0	.\clips\41.0 nr(40.9_41.2)085700-Clip949_1.avi	nr	1	41	39
2025es	female	n	0	.\clips\59.7 wr(59.6_60.0)084019-Clip115_1.avi	wr	0.75	59.7	29
2025es	female	n	0	.\clips\33.8 wr(32.9_34.6)132139-Clip1225_1.avi	wr	0.5	33.8	23
2025es	female	n	0	.\clips\38.2 nr(37.5_38.8)113538-Clip75_1.avi	nr	0.38	38.2	33
2025es	female	n	0	.\clips\60.1 nr(60.0_60.2)153252-Clip333_1.avi	nr	0.38	60.1	48
2025es	female	n	0	.\clips\21.1 nr(20.3_21.9)100635-Clip1355_1.avi	nr	0.75	21.1	5
2025es	female	n	0	.\clips\43.4 nr(43.3_43.5)132139-Clip575_1.avi	nr	0.5	43.4	33
2025es	female	n	0	.\clips\46.7 nr(46.6_46.8)152855-Clip725_1.avi	nr	0.75	46.7	39
2025es	female	n	0	.\clips\60.0 wr(58.9_60.7)083227-Clip644_1.avi	wr	0.38	60	27
2025es	female	n	0	.\clips\09.0 wr(08.9_09.3)123137-Clip416_1.avi	wr	0.75	9	1
2025es	female	n	0	.\clips\05.5 wr(04.6_07.1)123137-Clip474_1.avi	wr	1	5.5	0
2025es	female	n	0	.\clips\47.1 wr(46.3_48.0)081019-Clip258_1.avi	wr	0.5	47.1	49
2025es	female	n	0	.\clips\29.7 wr(29.4_30.0)152855-Clip1053_1.avi	wr	0.75	29.7	14
2025es	female	n	0	.\clips\48.3 nr(47.7_48.9)152855-Clip623_1.avi	nr	0.5	48.3	24
2025es	female	n	0	.\clips\27.5 wr(26.6_28.5)152855-Clip1626_1.avi	wr	0.38	27.5	39
2025es	female	n	0	.\clips\19.1 wr(18.4_19.8)085534-Clip591_1.avi	wr	0.75	19.1	11
2025es	female	n	0	.\clips\08.4 wr(08.4_08.5)083227-Clip1722_1.avi	wr	0.5	8.4	6
2025es	female	n	0	.\clips\31.4 wr(30.9_32.1)085534-Clip1698_1.avi	wr	0.38	31.4	20
2025es	female	n	0	.\clips\24.1 wr(23.4_24.8)123137-Clip25_1.avi	wr	0.75	24.1	40
2025es	female	n	0	.\clips\57.5 nr(57.2_57.7)123137-Clip812_1.avi	nr	0.38	57.5	49
2025es	female	n	0	.\clips\46.7 wr(45.5_47.4)085534-Clip474_1.avi	wr	0.75	46.7	34
2025es	female	n	0	.\clips\05.3 wr(03.9_06.0)123137-Clip456_1.avi	wr	0.38	5.3	1
2025es	female	n	0	.\clips\15.3 nr(14.7_16.3)105713-Clip1198_1.avi	nr	0.38	15.3	23
2025es	female	n	0	.\clips\52.7 nr(52.4_53.1)123137-Clip135_1.avi	nr	0.38	52.7	29
2025es	female	n	0	.\clips\15.7 wr(15.6_15.8)085700-Clip1447_1.avi	wr	0.38	15.7	5
2025es	female	n	0	.\clips\27.1 nr(26.4_28.2)085534-Clip330_1.avi	nr	0.5	27.1	16
2025es	female	n	0	.\clips\39.0 nr(38.9_39.2)135139-Clip341_1.avi	nr	1	39	19
2025es	female	n	0	.\clips\15.8 nr(15.4_16.3)085534-Clip67_1.avi	nr	1	15.8	18
2025es	female	n	0	.\clips\07.9 nr(07.0_08.8)143252-Clip406_1.avi	nr	0.38	7.9	11
2025es	female	n	0	.\clips\31.6 nr(30.6_32.5)135139-Clip51_1.avi	nr	0.5	31.6	40
2025es	female	n	0	.\clips\18.0 wr(17.9_18.1)085700-Clip1468_1.avi	wr	0.5	18	10
2025es	female	n	0	.\clips\29.5 nr(29.4_29.6)085534-Clip146_1.avi	nr	0.75	29.5	23
2025es	female	n	0	.\clips\40.7 wr(40.2_41.0)152855-Clip763_1.avi	wr	0.38	40.7	19
2025es	female	n	0	.\clips\32.3 nr(32.1_32.3)085534-Clip1305_1.avi	nr	0.38	32.3	32
2025es	female	n	0	.\clips\39.1 wr(38.8_39.7)152855-Clip768_1.avi	wr	0.75	39.1	49
2025es	female	n	0	.\clips\50.8 wr(50.1_51.5)153252-Clip83_1.avi	wr	0.75	50.8	39
2025es	female	n	0	.\clips\09.0 nr(09.0_09.1)100635-Clip169_1.avi	nr	1	9	4
2025es	female	n	0	.\clips\56.7 wr(55.7_57.3)153252-Clip16_1.avi	wr	0.75	56.7	44
2025es	female	n	0	.\clips\58.4 wr(57.6_58.9)153252-Clip21_1.avi	wr	0.5	58.4	49
2025es	female	n	0	.\clips\57.5 nr(57.1_58.0)120137-Clip335_1.avi	nr	0.5	57.5	59
2025es	female	n	0	.\clips\09.5 nr(08.7_10.3)105713-Clip169_1.avi	nr	0.75	9.5	3
2025es	female	n	0	.\clips\37.5 wr(36.8_38.3)152855-Clip1648_1.avi	wr	0.38	37.5	33
2025es	female	n	0	.\clips\10.1 nr(09.2_11.6)152855-Clip352_1.avi	nr	0.38	10.1	14
2025es	female	n	0	.\clips\52.2 wr(51.9_52.5)153252-Clip78_1.avi	wr	0.38	52.2	29
2025es	female	n	0	.\clips\35.5 wr(34.6_36.1)085534-Clip1586_1.avi	wr	0.38	35.5	39
2025es	female	n	0	.\clips\13.9 nr(13.1_14.6)105713-Clip1229_1.avi	nr	0.5	13.9	19
2025es	female	n	0	.\clips\63.2 wr(63.0_63.4)084019-Clip250_1.avi	wr	0.38	63.2	48
2025es	female	n	0	.\clips\29.2 wr(28.3_30.3)085534-Clip1693_1.avi	wr	1	29.2	19
2025es	female	n	0	.\clips\11.2 wr(10.4_11.8)083227-Clip1662_1.avi	wr	0.75	11.2	4
2025es	female	n	0	.\clips\59.3 nr(57.9_60.6)085700-Clip892_1.avi	nr	1	59.3	48
2025es	female	n	0	.\clips\42.5 nr(42.1_42.9)085534-Clip201_1.avi	nr	0.5	42.5	60
2025es	female	n	0	.\clips\19.7 nr(19.5_19.9)120137-Clip224_1.avi	nr	0.75	19.7	9
2025es	female	n	0	.\clips\60.9 nr(60.6_61.2)120137-Clip345_1.avi	nr	0.75	60.9	29
2025es	female	n	0	.\clips\07.2 wr(06.2_08.0)085534-Clip953_1.avi	wr	0.38	7.2	7
2025es	female	n	0	.\clips\14.4 wr(14.1_14.6)085534-Clip1201_1.avi	wr	0.75	14.4	6
2025es	female	n	0	.\clips\35.7 nr(35.4_35.9)085700-Clip171_1.avi	nr	0.38	35.7	33
2025es	female	n	0	.\clips\37.3 wr(37.1_37.5)133604-Clip226_1.avi	wr	0.75	37.3	16
2025es	female	n	0	.\clips\37.1 nr(36.9_37.3)152855-Clip575_1.avi	nr	0.75	37.1	19
2025es	female	n	0	.\clips\28.6 nr(27.5_29.1)100334-Clip125_1.avi	nr	1	28.6	23
2025es	female	n	0	.\clips\32.1 wr(31.2_32.9)085534-Clip820_1.avi	wr	0.75	32.1	24
2025es	female	n	0	.\clips\41.9 nr(41.5_42.3)123137-Clip901_1.avi	nr	0.75	41.9	25
2025es	female	n	0	.\clips\28.3 nr(27.8_29.3)100334-Clip236_1.avi	nr	0.5	28.3	19
2025es	female	n	0	.\clips\40.5 nr(39.9_41.6)152855-Clip1773_1.avi	nr	0.38	40.5	39
2025es	female	n	0	.\clips\27.6 nr(27.1_28.1)085534-Clip325_1.avi	nr	0.38	27.6	14
2025es	female	n	0	.\clips\53.3 nr(53.1_53.8)150252-Clip1283_1.avi	nr	0.5	53.3	29
2025es	female	n	0	.\clips\39.4 nr(39.1_39.9)135139-Clip356_1.avi	nr	0.75	39.4	32
2025es	female	n	0	.\clips\10.8 wr(09.9_11.8)083227-Clip1336_1.avi	wr	0.38	10.8	4
2025es	female	n	0	.\clips\59.6 nr(58.6_60.4)120137-Clip340_1.avi	nr	0.75	59.6	20
2025es	female	n	0	.\clips\19.2 nr(18.2_19.9)100635-Clip1360_1.avi	nr	1	19.2	14
2025es	female	n	0	.\clips\38.1 wr(38.0_38.3)152855-Clip798_1.avi	wr	0.5	38.1	34
2025es	female	n	0	.\clips\11.3 nr(10.7_12.6)150252-Clip979_1.avi	nr	0.75	11.3	5
2025es	female	n	0	.\clips\16.4 wr(15.7_17.4)083227-Clip887_1.avi	wr	1	16.4	14
2025es	female	n	0	.\clips\41.7 wr(40.4_42.4)083227-Clip591_1.avi	wr	1	41.7	34
2025es	female	n	0	.\clips\26.7 wr(25.7_27.6)132139-Clip1506_1.avi	wr	0.75	26.7	44
2025es	female	n	0	.\clips\56.6 wr(55.5_57.4)133604-Clip593_1.avi	wr	1	56.6	49
2025es	female	n	0	.\clips\16.7 wr(16.6_16.7)091040-Clip871_1.avi	wr	0.5	16.7	9
2025es	female	n	0	.\clips\51.6 nr(50.8_52.2)150252-Clip1069_1.avi	nr	0.75	51.6	48
2025es	female	n	0	.\clips\26.6 nr(25.9_27.4)100334-Clip209_1.avi	nr	0.75	26.6	34
2025es	female	n	0	.\clips\21.3 wr(21.2_21.5)085534-Clip728_1.avi	wr	0.38	21.3	22
2025es	female	n	0	.\clips\12.3 wr(11.2_13.1)085534-Clip1099_1.avi	wr	0.38	12.3	3
2025es	female	n	0	.\clips\30.4 nr(29.3_31.2)100334-Clip182_1.avi	nr	1	30.4	39
2025es	female	n	0	.\clips\26.5 wr(26.3_26.7)083227-Clip576_1.avi	wr	1	26.5	25
2025es	female	n	0	.\clips\14.3 nr(13.7_15.0)085534-Clip62_1.avi	nr	0.75	14.3	14
2025es	female	n	0	.\clips\23.5 nr(22.4_24.3)135139-Clip64_1.avi	nr	0.5	23.5	33
2025es	female	n	0	.\clips\50.0 wr(49.4_51.1)084019-Clip273_1.avi	wr	0.38	50	22
2025es	female	n	0	.\clips\60.4 nr(60.3_60.5)153252-Clip328_1.avi	nr	1	60.4	21
2025es	female	n	0	.\clips\25.6 nr(25.4_25.9)085534-Clip315_1.avi	nr	1	25.6	16
2025es	female	n	0	.\clips\44.8 nr(44.0_45.5)152855-Clip648_1.avi	nr	0.75	44.8	52
2025es	female	n	0	.\clips\34.9 wr(33.9_35.9)132139-Clip1263_1.avi	wr	0.75	34.9	44
2025es	female	n	0	.\clips\57.3 nr(56.8_57.5)150252-Clip1157_1.avi	nr	0.75	57.3	44
2025es	female	n	0	.\clips\10.9 wr(10.4_11.5)091040-Clip1582_1.avi	wr	1	10.9	7
2025es	female	n	0	.\clips\25.0 wr(23.9_25.8)085534-Clip809_1.avi	wr	0.38	25	4
2025es	female	n	0	.\clips\37.4 wr(36.9_38.0)133604-Clip287_1.avi	wr	0.5	37.4	24
2025es	female	n	0	.\clips\20.2 nr(19.4_21.3)110538-Clip1556_1.avi	nr	0.38	20.2	28
2025es	female	n	0	.\clips\08.8 wr(07.6_10.5)083227-Clip1657_1.avi	wr	1	8.8	5
2025es	female	n	0	.\clips\45.9 nr(44.9_46.8)135139-Clip512_1.avi	nr	0.38	45.9	37
2025es	female	n	0	.\clips\55.4 nr(54.6_56.4)120137-Clip325_1.avi	nr	0.38	55.4	34
2025es	female	n	0	.\clips\48.8 wr(48.0_49.4)133604-Clip604_1.avi	wr	1	48.8	38
2030nr	female	y	46	.\clips\18.0 wr(17.9_18.1)085700-Clip1468_1.avi	wr	0.5	18	10
2030nr	female	y	46	.\clips\35.5 wr(34.6_36.1)085534-Clip1586_1.avi	wr	0.38	35.5	29
2030nr	female	y	46	.\clips\41.9 nr(41.5_42.3)123137-Clip901_1.avi	nr	0.5	41.9	39
2030nr	female	y	46	.\clips\48.8 wr(48.0_49.4)133604-Clip604_1.avi	wr	0.38	48.8	54
2030nr	female	y	46	.\clips\52.0 nr(51.7_52.3)123137-Clip130_1.avi	nr	0.75	52	49
2030nr	female	y	46	.\clips\49.1 wr(48.3_50.0)081019-Clip263_1.avi	wr	1	49.1	55
2030nr	female	y	46	.\clips\61.3 wr(60.9_62.3)100334-Clip590_1.avi	wr	0.5	61.3	64
2030nr	female	y	46	.\clips\10.8 wr(09.9_11.8)083227-Clip1336_1.avi	wr	0.38	10.8	19
2030nr	female	y	46	.\clips\62.7 nr(62.6_62.7)150252-Clip1183_1.avi	nr	0.38	62.7	65
2030nr	female	y	46	.\clips\09.0 nr(09.0_09.1)100635-Clip169_1.avi	nr	0.38	9	10
2030nr	female	y	46	.\clips\25.0 wr(23.9_25.8)085534-Clip809_1.avi	wr	0.38	25	24
2030nr	female	y	46	.\clips\46.7 nr(45.7_47.5)123137-Clip913_1.avi	nr	1	46.7	38
2030nr	female	y	46	.\clips\50.8 wr(50.1_51.5)153252-Clip83_1.avi	wr	0.5	50.8	49
2030nr	female	y	46	.\clips\26.7 wr(25.7_27.6)132139-Clip1506_1.avi	wr	0.5	26.7	29
2030nr	female	y	46	.\clips\27.1 nr(26.4_28.2)085534-Clip330_1.avi	nr	0.75	27.1	34
2030nr	female	y	46	.\clips\11.3 nr(10.7_12.6)150252-Clip979_1.avi	nr	0.5	11.3	24
2030nr	female	y	46	.\clips\15.8 nr(15.4_16.3)085534-Clip67_1.avi	nr	1	15.8	25
2030nr	female	y	46	.\clips\33.4 wr(32.8_34.4)132139-Clip1257_1.avi	wr	0.75	33.4	39
2030nr	female	y	46	.\clips\21.2 wr(20.3_21.6)085534-Clip723_1.avi	wr	0.75	21.2	23
2030nr	female	y	46	.\clips\09.0 wr(08.9_09.3)123137-Clip416_1.avi	wr	1	9	8
2030nr	female	y	46	.\clips\06.2 nr(05.7_07.5)132139-Clip249_1.avi	nr	0.5	6.2	16
2030nr	female	y	46	.\clips\57.3 nr(56.8_57.5)150252-Clip1157_1.avi	nr	0.5	57.3	60
2030nr	female	y	46	.\clips\28.6 nr(27.5_29.1)100334-Clip125_1.avi	nr	0.38	28.6	38
2030nr	female	y	46	.\clips\60.0 wr(58.9_60.7)083227-Clip644_1.avi	wr	0.38	60	60
2030nr	female	y	46	.\clips\43.1 nr(42.3_43.7)132139-Clip654_1.avi	nr	0.75	43.1	43
2030nr	female	y	46	.\clips\26.5 wr(26.3_26.7)083227-Clip576_1.avi	wr	1	26.5	29
2030nr	female	y	46	.\clips\43.4 nr(43.3_43.5)132139-Clip575_1.avi	nr	0.5	43.4	49
2030nr	female	y	46	.\clips\11.2 nr(09.7_12.8)083227-Clip345_1.avi	nr	1	11.2	27
2030nr	female	y	46	.\clips\08.2 nr(07.5_08.7)112540-Clip813_1.avi	nr	0.5	8.2	30
2030nr	female	y	46	.\clips\38.1 wr(38.0_38.3)152855-Clip798_1.avi	wr	0.5	38.1	45
2030nr	female	y	46	.\clips\05.7 wr(04.8_07.4)123137-Clip521_1.avi	wr	0.5	5.7	13
2030nr	female	y	46	.\clips\16.8 nr(15.8_17.8)100635-Clip1253_1.avi	nr	0.75	16.8	39
2030nr	female	y	46	.\clips\45.7 wr(44.8_46.5)133604-Clip692_1.avi	wr	0.38	45.7	56
2030nr	female	y	46	.\clips\34.5 nr(34.2_35.2)085700-Clip425_1.avi	nr	0.38	34.5	49
2030nr	female	y	46	.\clips\58.4 nr(58.0_58.9)123137-Clip817_1.avi	nr	0.5	58.4	54
2030nr	female	y	46	.\clips\51.5 wr(51.2_51.8)153252-Clip73_1.avi	wr	0.75	51.5	58
2030nr	female	y	46	.\clips\42.0 wr(41.7_42.3)133604-Clip349_1.avi	wr	0.5	42	46
2030nr	female	y	46	.\clips\12.0 wr(11.6_12.9)083227-Clip770_1.avi	wr	0.75	12	33
2030nr	female	y	46	.\clips\31.2 nr(30.4_31.4)135139-Clip74_1.avi	nr	0.5	31.2	44
2030nr	female	y	46	.\clips\10.1 nr(09.2_11.6)152855-Clip352_1.avi	nr	0.38	10.1	27
2030nr	female	y	46	.\clips\13.6 wr(13.4_13.9)085534-Clip1206_1.avi	wr	0.38	13.6	26
2030nr	female	y	46	.\clips\57.5 nr(57.2_57.7)123137-Clip812_1.avi	nr	0.75	57.5	55
2030nr	female	y	46	.\clips\23.9 nr(23.3_24.4)132139-Clip503_1.avi	nr	0.38	23.9	47
2030nr	female	y	46	.\clips\31.4 wr(30.9_32.1)085534-Clip1698_1.avi	wr	0.38	31.4	47
2030nr	female	y	46	.\clips\08.8 wr(07.6_10.5)083227-Clip1657_1.avi	wr	0.38	8.8	29
2030nr	female	y	46	.\clips\20.4 wr(19.4_20.9)083227-Clip835_1.avi	wr	0.38	20.4	29
2030nr	female	y	46	.\clips\59.6 nr(58.6_60.4)120137-Clip340_1.avi	nr	1	59.6	57
2030nr	female	y	46	.\clips\62.1 nr(61.0_62.8)150252-Clip1173_1.avi	nr	0.75	62.1	64
2030nr	female	y	46	.\clips\53.3 nr(53.1_53.8)150252-Clip1283_1.avi	nr	0.5	53.3	59
2030nr	female	y	46	.\clips\38.0 nr(37.3_39.0)135139-Clip366_1.avi	nr	0.75	38	55
2030nr	female	y	46	.\clips\05.5 wr(04.6_07.1)123137-Clip474_1.avi	wr	1	5.5	19
2030nr	female	y	46	.\clips\07.9 nr(05.9_09.2)110538-Clip209_1.avi	nr	0.75	7.9	18
2030nr	female	y	46	.\clips\26.6 nr(25.9_27.4)100334-Clip209_1.avi	nr	0.5	26.6	40
2030nr	female	y	46	.\clips\24.8 nr(23.6_26.0)085534-Clip1440_1.avi	nr	1	24.8	39
2030nr	female	y	46	.\clips\21.8 wr(21.7_22.0)085534-Clip1048_1.avi	wr	0.5	21.8	35
2030nr	female	y	46	.\clips\22.9 nr(22.1_23.8)085700-Clip395_1.avi	nr	0.75	22.9	36
2030nr	female	y	46	.\clips\18.5 wr(17.9_19.2)085534-Clip718_1.avi	wr	0.38	18.5	35
2030nr	female	y	46	.\clips\48.8 nr(47.1_49.7)123137-Clip252_1.avi	nr	0.38	48.8	56
2030nr	female	y	46	.\clips\05.5 nr(04.5_06.5)150252-Clip1005_1.avi	nr	1	5.5	15
2030nr	female	y	46	.\clips\38.7 wr(37.9_39.4)152855-Clip1643_1.avi	wr	0.38	38.7	45
2030nr	female	y	46	.\clips\09.5 nr(08.7_10.3)105713-Clip169_1.avi	nr	1	9.5	25
2030nr	female	y	46	.\clips\58.0 wr(57.6_58.3)121332-Clip284_1.avi	wr	0.75	58	62
2030nr	female	y	46	.\clips\12.9 wr(12.2_13.2)085534-Clip1211_1.avi	wr	0.5	12.9	30
2030nr	female	y	46	.\clips\37.5 wr(36.8_38.3)152855-Clip1648_1.avi	wr	0.75	37.5	44
2030nr	female	y	46	.\clips\05.3 wr(03.9_06.0)123137-Clip456_1.avi	wr	0.38	5.3	13
2030nr	female	y	46	.\clips\15.7 wr(15.6_15.8)085700-Clip1447_1.avi	wr	0.38	15.7	13
2030nr	female	y	46	.\clips\06.5 wr(05.5_08.1)083227-Clip1674_1.avi	wr	0.75	6.5	13
2030nr	female	y	46	.\clips\27.6 nr(27.1_28.1)085534-Clip325_1.avi	nr	0.75	27.6	34
2030nr	female	y	46	.\clips\38.2 nr(37.5_38.8)113538-Clip75_1.avi	nr	0.75	38.2	43
2030nr	female	y	46	.\clips\47.8 wr(47.0_48.9)083227-Clip611_1.avi	wr	0.75	47.8	56
2030nr	female	y	46	.\clips\41.7 wr(40.4_42.4)083227-Clip591_1.avi	wr	1	41.7	56
2030nr	female	y	46	.\clips\11.7 nr(11.2_11.8)105713-Clip158_1.avi	nr	0.75	11.7	25
2030nr	female	y	46	.\clips\64.4 wr(63.5_65.0)153252-Clip237_1.avi	wr	1	64.4	63
2030nr	female	y	46	.\clips\16.7 wr(16.6_16.7)091040-Clip871_1.avi	wr	0.75	16.7	32
2030nr	female	y	46	.\clips\63.9 wr(62.9_64.5)100334-Clip596_1.avi	wr	0.5	63.9	63
2030nr	female	y	46	.\clips\15.3 nr(14.7_16.3)105713-Clip1198_1.avi	nr	0.38	15.3	35
2030nr	female	y	46	.\clips\44.8 nr(44.0_45.5)152855-Clip648_1.avi	nr	1	44.8	57
2030nr	female	y	46	.\clips\62.5 wr(61.9_63.3)100334-Clip649_1.avi	wr	0.75	62.5	65
2030nr	female	y	46	.\clips\63.2 wr(63.0_63.4)084019-Clip250_1.avi	wr	0.75	63.2	65
2030nr	female	y	46	.\clips\34.8 wr(34.6_35.3)135139-Clip224_1.avi	wr	0.38	34.8	48
2030nr	female	y	46	.\clips\31.6 nr(30.6_32.5)135139-Clip51_1.avi	nr	0.75	31.6	47
2030nr	female	y	46	.\clips\48.3 nr(47.7_48.9)152855-Clip623_1.avi	nr	0.5	48.3	55
2030nr	female	y	46	.\clips\27.2 wr(26.2_27.9)085534-Clip976_1.avi	wr	0.75	27.2	39
2030nr	female	y	46	.\clips\38.6 nr(37.6_39.2)123137-Clip84_1.avi	nr	0.5	38.6	49
2030nr	female	y	46	.\clips\39.0 nr(38.9_39.2)135139-Clip341_1.avi	nr	0.38	39	55
2030nr	female	y	46	.\clips\61.7 nr(61.4_62.0)120137-Clip350_1.avi	nr	0.75	61.7	57
2030nr	female	y	46	.\clips\58.4 wr(57.6_58.9)153252-Clip21_1.avi	wr	0.5	58.4	66
2030nr	female	y	46	.\clips\34.9 wr(33.9_35.9)132139-Clip1263_1.avi	wr	1	34.9	45
2030nr	female	y	46	.\clips\21.3 wr(21.2_21.5)085534-Clip728_1.avi	wr	0.75	21.3	29
2030nr	female	y	46	.\clips\40.5 nr(39.9_41.6)152855-Clip1773_1.avi	nr	0.38	40.5	56
2030nr	female	y	46	.\clips\42.5 nr(42.1_42.9)085534-Clip201_1.avi	nr	0.75	42.5	48
2030nr	female	y	46	.\clips\55.4 nr(54.6_56.4)120137-Clip325_1.avi	nr	0.38	55.4	47
2030nr	female	y	46	.\clips\14.4 wr(14.1_14.6)085534-Clip1201_1.avi	wr	1	14.4	26
2030nr	female	y	46	.\clips\07.2 wr(06.2_08.0)085534-Clip953_1.avi	wr	0.75	7.2	25
2030nr	female	y	46	.\clips\16.4 wr(15.7_17.4)083227-Clip887_1.avi	wr	1	16.4	25
2030nr	female	y	46	.\clips\20.2 nr(19.4_21.3)110538-Clip1556_1.avi	nr	0.38	20.2	32
2030nr	female	y	46	.\clips\51.6 nr(50.8_52.2)150252-Clip1069_1.avi	nr	0.5	51.6	51
2030nr	female	y	46	.\clips\50.3 nr(49.2_51.0)150252-Clip1226_1.avi	nr	0.38	50.3	60
2030nr	female	y	46	.\clips\30.4 nr(29.3_31.2)100334-Clip182_1.avi	nr	1	30.4	35
2030nr	female	y	46	.\clips\57.0 wr(56.6_57.4)085534-Clip524_1.avi	wr	0.75	57	50
2030nr	female	y	46	.\clips\20.3 nr(19.9_21.3)091040-Clip98_1.avi	nr	1	20.3	21
2030nr	female	y	46	.\clips\44.0 wr(42.9_44.5)121332-Clip257_1.avi	wr	0.38	44	35
2030nr	female	y	46	.\clips\39.1 wr(38.8_39.7)152855-Clip768_1.avi	wr	1	39.1	47
2030nr	female	y	46	.\clips\18.6 nr(18.1_19.2)110538-Clip1333_1.avi	nr	0.5	18.6	36
2030nr	female	y	46	.\clips\05.4 nr(04.7_06.1)103635-Clip535_1.avi	nr	0.38	5.4	26
2030nr	female	y	46	.\clips\59.3 nr(57.9_60.6)085700-Clip892_1.avi	nr	0.38	59.3	55
2030nr	female	y	46	.\clips\19.1 wr(18.4_19.8)085534-Clip591_1.avi	wr	1	19.1	30
2030nr	female	y	46	.\clips\21.1 nr(20.3_21.9)100635-Clip1355_1.avi	nr	0.5	21.1	30
2030nr	female	y	46	.\clips\33.8 wr(32.9_34.6)132139-Clip1225_1.avi	wr	0.5	33.8	44
2030nr	female	y	46	.\clips\13.8 nr(13.3_14.3)083227-Clip367_1.avi	nr	0.75	13.8	24
2030nr	female	y	46	.\clips\49.5 nr(49.3_49.6)123137-Clip114_1.avi	nr	1	49.5	55
2030nr	female	y	46	.\clips\24.1 wr(23.4_24.8)123137-Clip25_1.avi	wr	1	24.1	46
2030nr	female	y	46	.\clips\50.0 wr(49.4_51.1)084019-Clip273_1.avi	wr	0.38	50	49
2030nr	female	y	46	.\clips\47.3 nr(46.2_47.9)120137-Clip305_1.avi	nr	0.75	47.3	49
2030nr	female	y	46	.\clips\10.9 wr(10.4_11.5)091040-Clip1582_1.avi	wr	1	10.9	29
2030nr	female	y	46	.\clips\32.5 wr(32.3_32.6)085534-Clip840_1.avi	wr	0.75	32.5	39
2030nr	female	y	46	.\clips\35.7 nr(35.4_35.9)085700-Clip171_1.avi	nr	0.38	35.7	45
2030nr	female	y	46	.\clips\40.7 wr(40.2_41.0)152855-Clip763_1.avi	wr	0.38	40.7	56
2030nr	female	y	46	.\clips\62.8 nr(62.7_62.8)150252-Clip1178_1.avi	nr	1	62.8	64
2030nr	female	y	46	.\clips\11.2 wr(10.4_11.8)083227-Clip1662_1.avi	wr	0.5	11.2	25
2030nr	female	y	46	.\clips\28.3 nr(27.8_29.3)100334-Clip236_1.avi	nr	0.5	28.3	36
2030nr	female	y	46	.\clips\47.1 wr(46.3_48.0)081019-Clip258_1.avi	wr	0.75	47.1	60
2030nr	female	y	46	.\clips\16.5 wr(16.4_16.6)091040-Clip846_1.avi	wr	0.5	16.5	41
2030nr	female	y	46	.\clips\56.7 wr(55.7_57.3)153252-Clip16_1.avi	wr	0.5	56.7	56
2030nr	female	y	46	.\clips\07.9 nr(07.0_08.8)143252-Clip406_1.avi	nr	0.75	7.9	30
2030nr	female	y	46	.\clips\46.2 wr(45.7_46.8)083227-Clip606_1.avi	wr	1	46.2	42
2030nr	female	y	46	.\clips\13.9 nr(13.1_14.6)105713-Clip1229_1.avi	nr	0.5	13.9	34
2030nr	female	y	46	.\clips\64.2 wr(63.1_64.8)153252-Clip211_1.avi	wr	0.38	64.2	57
2030nr	female	y	46	.\clips\12.3 wr(11.2_13.1)085534-Clip1099_1.avi	wr	0.75	12.3	20
2030nr	female	y	46	.\clips\46.7 nr(46.6_46.8)152855-Clip725_1.avi	nr	0.5	46.7	53
2030nr	female	y	46	.\clips\32.3 nr(32.1_32.3)085534-Clip1305_1.avi	nr	0.75	32.3	44
2030nr	female	y	46	.\clips\52.7 nr(52.4_53.1)123137-Clip135_1.avi	nr	0.75	52.7	58
2030nr	female	y	46	.\clips\43.8 wr(43.1_44.3)133604-Clip697_1.avi	wr	0.5	43.8	54
2030nr	female	y	46	.\clips\17.9 wr(17.8_18.0)085534-Clip713_1.avi	wr	0.75	17.9	30
2030nr	female	y	46	.\clips\20.8 wr(20.1_21.5)085534-Clip586_1.avi	wr	1	20.8	20
2030nr	female	y	46	.\clips\55.0 wr(54.9_55.2)085534-Clip514_1.avi	wr	0.38	55	55
2030nr	female	y	46	.\clips\27.5 wr(26.6_28.5)152855-Clip1626_1.avi	wr	0.75	27.5	45
2030nr	female	y	46	.\clips\21.1 wr(21.1_21.2)085534-Clip566_1.avi	wr	0.5	21.1	30
2030nr	female	y	46	.\clips\39.4 nr(39.1_39.9)135139-Clip356_1.avi	nr	1	39.4	54
2030nr	female	y	46	.\clips\48.5 wr(48.0_48.8)084019-Clip384_1.avi	wr	0.5	48.5	49
2030nr	female	y	46	.\clips\59.7 wr(59.6_60.0)084019-Clip115_1.avi	wr	1	59.7	49
2030nr	female	y	46	.\clips\43.6 nr(43.0_44.2)152855-Clip679_1.avi	nr	0.38	43.6	53
2030nr	female	y	46	.\clips\14.0 nr(12.1_15.5)132139-Clip189_1.avi	nr	0.38	14	28
2030nr	female	y	46	.\clips\23.5 nr(22.4_24.3)135139-Clip64_1.avi	nr	0.5	23.5	21
2030nr	female	y	46	.\clips\60.9 nr(60.6_61.2)120137-Clip345_1.avi	nr	0.5	60.9	57
2030nr	female	y	46	.\clips\36.4 wr(35.8_37.4)152855-Clip1501_1.avi	wr	1	36.4	38
2030nr	female	y	46	.\clips\21.6 nr(20.6_22.5)083227-Clip396_1.avi	nr	0.75	21.6	25
2030nr	female	y	46	.\clips\37.4 wr(36.9_38.0)133604-Clip287_1.avi	wr	0.75	37.4	39
2030nr	female	y	46	.\clips\60.1 nr(60.0_60.2)153252-Clip333_1.avi	nr	0.38	60.1	65
2030nr	female	y	46	.\clips\54.8 wr(54.2_55.5)133604-Clip622_1.avi	wr	1	54.8	56
2030nr	female	y	46	.\clips\50.9 nr(49.8_51.5)123137-Clip125_1.avi	nr	1	50.9	56
2030nr	female	y	46	.\clips\25.6 nr(25.4_25.9)085534-Clip315_1.avi	nr	1	25.6	31
2030nr	female	y	46	.\clips\59.5 wr(59.3_59.8)083227-Clip695_1.avi	wr	0.38	59.5	49
2030nr	female	y	46	.\clips\33.2 nr(32.9_33.5)112540-Clip1725_1.avi	nr	0.5	33.2	38
2030nr	female	y	46	.\clips\43.0 wr(42.9_43.1)133604-Clip702_1.avi	wr	0.75	43	39
2030nr	female	y	46	.\clips\47.2 nr(46.9_47.5)123137-Clip163_1.avi	nr	0.75	47.2	55
2030nr	female	y	46	.\clips\37.3 wr(37.1_37.5)133604-Clip226_1.avi	wr	0.5	37.3	44
2030nr	female	y	46	.\clips\46.7 wr(45.5_47.4)085534-Clip474_1.avi	wr	0.5	46.7	45
2030nr	female	y	46	.\clips\19.7 nr(19.5_19.9)120137-Clip224_1.avi	nr	1	19.7	25
2030nr	female	y	46	.\clips\34.9 nr(34.4_35.8)085700-Clip430_1.avi	nr	1	34.9	39
2030nr	female	y	46	.\clips\56.0 nr(55.3_56.9)150252-Clip1298_1.avi	nr	1	56	42
2030nr	female	y	46	.\clips\28.6 wr(27.8_29.7)085534-Clip1683_1.avi	wr	0.5	28.6	42
2030nr	female	y	46	.\clips\29.2 wr(28.3_30.3)085534-Clip1693_1.avi	wr	0.38	29.2	45
2030nr	female	y	46	.\clips\52.9 wr(52.8_53.0)133604-Clip632_1.avi	wr	0.5	52.9	60
2030nr	female	y	46	.\clips\52.2 wr(51.9_52.5)153252-Clip78_1.avi	wr	0.75	52.2	62
2030nr	female	y	46	.\clips\57.5 nr(57.1_58.0)120137-Clip335_1.avi	nr	0.75	57.5	62
2030nr	female	y	46	.\clips\45.9 nr(44.9_46.8)135139-Clip512_1.avi	nr	0.38	45.9	63
2030nr	female	y	46	.\clips\50.5 wr(50.4_50.7)150252-Clip1099_1.avi	wr	1	50.5	64
2030nr	female	y	46	.\clips\36.0 nr(35.3_36.5)132139-Clip720_1.avi	nr	1	36	61
2030nr	female	y	46	.\clips\19.2 nr(18.2_19.9)100635-Clip1360_1.avi	nr	0.38	19.2	31
2030nr	female	y	46	.\clips\16.3 nr(15.4_17.1)120137-Clip186_1.avi	nr	0.5	16.3	30
2030nr	female	y	46	.\clips\31.5 wr(31.3_31.9)085534-Clip835_1.avi	wr	1	31.5	37
2030nr	female	y	46	.\clips\18.3 nr(17.1_19.5)105713-Clip1203_1.avi	nr	0.75	18.3	37
2030nr	female	y	46	.\clips\30.2 nr(29.6_31.2)171711-Clip306_1.avi	nr	0.38	30.2	36
2030nr	female	y	46	.\clips\29.7 wr(29.4_30.0)152855-Clip1053_1.avi	wr	1	29.7	43
2030nr	female	y	46	.\clips\54.3 nr(53.2_54.7)123137-Clip841_1.avi	nr	1	54.3	50
2030nr	female	y	46	.\clips\41.0 nr(40.9_41.2)085700-Clip949_1.avi	nr	1	41	60
2030nr	female	y	46	.\clips\62.1 nr(61.6_62.3)084019-Clip180_1.avi	nr	0.5	62.1	54
2030nr	female	y	46	.\clips\60.6 wr(60.4_60.7)083227-Clip649_1.avi	wr	1	60.6	54
2030nr	female	y	46	.\clips\43.7 wr(42.8_44.2)133604-Clip344_1.avi	wr	0.75	43.7	50
2030nr	female	y	46	.\clips\32.1 wr(31.2_32.9)085534-Clip820_1.avi	wr	0.5	32.1	43
2030nr	female	y	46	.\clips\44.6 wr(44.1_45.2)083227-Clip601_1.avi	wr	1	44.6	44
2030nr	female	y	46	.\clips\60.4 nr(60.3_60.5)153252-Clip328_1.avi	nr	1	60.4	66
2030nr	female	y	46	.\clips\22.4 wr(21.3_23.3)085534-Clip804_1.avi	wr	0.38	22.4	24
2030nr	female	y	46	.\clips\56.6 wr(55.5_57.4)133604-Clip593_1.avi	wr	1	56.6	50
2030nr	female	y	46	.\clips\08.4 wr(08.4_08.5)083227-Clip1722_1.avi	wr	0.5	8.4	21
2030nr	female	y	46	.\clips\54.1 nr(53.2_54.6)123137-Clip151_1.avi	nr	0.38	54.1	60
2030nr	female	y	46	.\clips\14.3 nr(13.7_15.0)085534-Clip62_1.avi	nr	1	14.3	21
2030nr	female	y	46	.\clips\37.1 nr(36.9_37.3)152855-Clip575_1.avi	nr	0.5	37.1	47
2030nr	female	y	46	.\clips\25.4 nr(25.1_25.8)085700-Clip82_1.avi	nr	0.38	25.4	39
2030nr	female	y	46	.\clips\29.5 nr(29.4_29.6)085534-Clip146_1.avi	nr	1	29.5	39
2030nr	female	y	46	.\clips\53.4 wr(53.1_53.7)133604-Clip637_1.avi	wr	0.38	53.4	54
2464ys	male	y	8	.\clips\50.9 nr(49.8_51.5)123137-Clip125_1.avi	nr	0.38	50.9	45
2464ys	male	y	8	.\clips\30.4 nr(29.3_31.2)100334-Clip182_1.avi	nr	0.38	30.4	25
2464ys	male	y	8	.\clips\43.0 wr(42.9_43.1)133604-Clip702_1.avi	wr	0.75	43	45
2464ys	male	y	8	.\clips\18.3 nr(17.1_19.5)105713-Clip1203_1.avi	nr	0.5	18.3	10
2464ys	male	y	8	.\clips\38.7 wr(37.9_39.4)152855-Clip1643_1.avi	wr	1	38.7	30
2464ys	male	y	8	.\clips\34.8 wr(34.6_35.3)135139-Clip224_1.avi	wr	1	34.8	35
2464ys	male	y	8	.\clips\29.5 nr(29.4_29.6)085534-Clip146_1.avi	nr	0.38	29.5	25
2464ys	male	y	8	.\clips\58.4 nr(58.0_58.9)123137-Clip817_1.avi	nr	1	58.4	40
2464ys	male	y	8	.\clips\13.9 nr(13.1_14.6)105713-Clip1229_1.avi	nr	1	13.9	12
2464ys	male	y	8	.\clips\24.8 nr(23.6_26.0)085534-Clip1440_1.avi	nr	0.38	24.8	20
2464ys	male	y	8	.\clips\16.4 wr(15.7_17.4)083227-Clip887_1.avi	wr	0.38	16.4	10
2464ys	male	y	8	.\clips\19.7 nr(19.5_19.9)120137-Clip224_1.avi	nr	0.38	19.7	15
2464ys	male	y	8	.\clips\59.3 nr(57.9_60.6)085700-Clip892_1.avi	nr	1	59.3	55
2464ys	male	y	8	.\clips\49.1 wr(48.3_50.0)081019-Clip263_1.avi	wr	0.38	49.1	60
2464ys	male	y	8	.\clips\44.0 wr(42.9_44.5)121332-Clip257_1.avi	wr	1	44	45
2464ys	male	y	8	.\clips\26.6 nr(25.9_27.4)100334-Clip209_1.avi	nr	0.75	26.6	28
2464ys	male	y	8	.\clips\23.5 nr(22.4_24.3)135139-Clip64_1.avi	nr	1	23.5	15
2464ys	male	y	8	.\clips\32.1 wr(31.2_32.9)085534-Clip820_1.avi	wr	0.75	32.1	35
2464ys	male	y	8	.\clips\20.2 nr(19.4_21.3)110538-Clip1556_1.avi	nr	0.5	20.2	25
2464ys	male	y	8	.\clips\62.5 wr(61.9_63.3)100334-Clip649_1.avi	wr	0.75	62.5	55
2464ys	male	y	8	.\clips\34.9 nr(34.4_35.8)085700-Clip430_1.avi	nr	0.38	34.9	40
2464ys	male	y	8	.\clips\61.7 nr(61.4_62.0)120137-Clip350_1.avi	nr	0.75	61.7	40
2464ys	male	y	8	.\clips\43.8 wr(43.1_44.3)133604-Clip697_1.avi	wr	1	43.8	45
2464ys	male	y	8	.\clips\43.6 nr(43.0_44.2)152855-Clip679_1.avi	nr	1	43.6	35
2464ys	male	y	8	.\clips\27.1 nr(26.4_28.2)085534-Clip330_1.avi	nr	0.75	27.1	25
2464ys	male	y	8	.\clips\52.0 nr(51.7_52.3)123137-Clip130_1.avi	nr	0.75	52	45
2464ys	male	y	8	.\clips\48.3 nr(47.7_48.9)152855-Clip623_1.avi	nr	1	48.3	50
2464ys	male	y	8	.\clips\46.2 wr(45.7_46.8)083227-Clip606_1.avi	wr	0.38	46.2	50
2464ys	male	y	8	.\clips\34.5 nr(34.2_35.2)085700-Clip425_1.avi	nr	1	34.5	30
2464ys	male	y	8	.\clips\30.2 nr(29.6_31.2)171711-Clip306_1.avi	nr	0.5	30.2	30
2464ys	male	y	8	.\clips\62.7 nr(62.6_62.7)150252-Clip1183_1.avi	nr	1	62.7	50
2464ys	male	y	8	.\clips\61.3 wr(60.9_62.3)100334-Clip590_1.avi	wr	0.75	61.3	60
2464ys	male	y	8	.\clips\52.2 wr(51.9_52.5)153252-Clip78_1.avi	wr	0.5	52.2	60
2464ys	male	y	8	.\clips\28.6 nr(27.5_29.1)100334-Clip125_1.avi	nr	1	28.6	25
2464ys	male	y	8	.\clips\63.2 wr(63.0_63.4)084019-Clip250_1.avi	wr	0.5	63.2	65
2464ys	male	y	8	.\clips\46.7 wr(45.5_47.4)085534-Clip474_1.avi	wr	0.75	46.7	55
2464ys	male	y	8	.\clips\15.3 nr(14.7_16.3)105713-Clip1198_1.avi	nr	0.5	15.3	15
2464ys	male	y	8	.\clips\54.8 wr(54.2_55.5)133604-Clip622_1.avi	wr	0.38	54.8	60
2464ys	male	y	8	.\clips\26.7 wr(25.7_27.6)132139-Clip1506_1.avi	wr	0.75	26.7	24
2464ys	male	y	8	.\clips\10.1 nr(09.2_11.6)152855-Clip352_1.avi	nr	0.5	10.1	8
2464ys	male	y	8	.\clips\56.7 wr(55.7_57.3)153252-Clip16_1.avi	wr	0.75	56.7	60
2464ys	male	y	8	.\clips\23.9 nr(23.3_24.4)132139-Clip503_1.avi	nr	1	23.9	30
2464ys	male	y	8	.\clips\20.4 wr(19.4_20.9)083227-Clip835_1.avi	wr	0.5	20.4	30
2464ys	male	y	8	.\clips\48.5 wr(48.0_48.8)084019-Clip384_1.avi	wr	1	48.5	45
2464ys	male	y	8	.\clips\15.7 wr(15.6_15.8)085700-Clip1447_1.avi	wr	0.5	15.7	15
2464ys	male	y	8	.\clips\21.1 wr(21.1_21.2)085534-Clip566_1.avi	wr	0.75	21.1	25
2464ys	male	y	8	.\clips\45.9 nr(44.9_46.8)135139-Clip512_1.avi	nr	0.5	45.9	45
2464ys	male	y	8	.\clips\36.4 wr(35.8_37.4)152855-Clip1501_1.avi	wr	0.38	36.4	40
2464ys	male	y	8	.\clips\35.5 wr(34.6_36.1)085534-Clip1586_1.avi	wr	0.5	35.5	35
2464ys	male	y	8	.\clips\25.0 wr(23.9_25.8)085534-Clip809_1.avi	wr	0.5	25	30
2464ys	male	y	8	.\clips\57.3 nr(56.8_57.5)150252-Clip1157_1.avi	nr	0.75	57.3	50
2464ys	male	y	8	.\clips\43.1 nr(42.3_43.7)132139-Clip654_1.avi	nr	0.5	43.1	40
2464ys	male	y	8	.\clips\58.0 wr(57.6_58.3)121332-Clip284_1.avi	wr	0.5	58	55
2464ys	male	y	8	.\clips\59.6 nr(58.6_60.4)120137-Clip340_1.avi	nr	0.38	59.6	55
2464ys	male	y	8	.\clips\05.3 wr(03.9_06.0)123137-Clip456_1.avi	wr	0.5	5.3	3
2464ys	male	y	8	.\clips\59.5 wr(59.3_59.8)083227-Clip695_1.avi	wr	1	59.5	50
2464ys	male	y	8	.\clips\59.7 wr(59.6_60.0)084019-Clip115_1.avi	wr	0.38	59.7	60
2464ys	male	y	8	.\clips\60.9 nr(60.6_61.2)120137-Clip345_1.avi	nr	0.75	60.9	45
2464ys	male	y	8	.\clips\52.7 nr(52.4_53.1)123137-Clip135_1.avi	nr	0.5	52.7	45
2464ys	male	y	8	.\clips\44.8 nr(44.0_45.5)152855-Clip648_1.avi	nr	0.38	44.8	50
2464ys	male	y	8	.\clips\40.5 nr(39.9_41.6)152855-Clip1773_1.avi	nr	0.5	40.5	40
2464ys	male	y	8	.\clips\48.8 nr(47.1_49.7)123137-Clip252_1.avi	nr	1	48.8	35
2464ys	male	y	8	.\clips\27.6 nr(27.1_28.1)085534-Clip325_1.avi	nr	0.5	27.6	20
2464ys	male	y	8	.\clips\40.7 wr(40.2_41.0)152855-Clip763_1.avi	wr	0.5	40.7	45
2464ys	male	y	8	.\clips\20.3 nr(19.9_21.3)091040-Clip98_1.avi	nr	0.38	20.3	15
2464ys	male	y	8	.\clips\16.7 wr(16.6_16.7)091040-Clip871_1.avi	wr	0.75	16.7	15
2464ys	male	y	8	.\clips\33.8 wr(32.9_34.6)132139-Clip1225_1.avi	wr	1	33.8	30
2464ys	male	y	8	.\clips\33.4 wr(32.8_34.4)132139-Clip1257_1.avi	wr	0.5	33.4	35
2464ys	male	y	8	.\clips\53.4 wr(53.1_53.7)133604-Clip637_1.avi	wr	1	53.4	40
2464ys	male	y	8	.\clips\55.0 wr(54.9_55.2)085534-Clip514_1.avi	wr	0.5	55	50
2464ys	male	y	8	.\clips\13.6 wr(13.4_13.9)085534-Clip1206_1.avi	wr	1	13.6	10
2464ys	male	y	8	.\clips\31.2 nr(30.4_31.4)135139-Clip74_1.avi	nr	0.75	31.2	30
2464ys	male	y	8	.\clips\08.4 wr(08.4_08.5)083227-Clip1722_1.avi	wr	1	8.4	5
2464ys	male	y	8	.\clips\10.9 wr(10.4_11.5)091040-Clip1582_1.avi	wr	0.38	10.9	10
2464ys	male	y	8	.\clips\05.7 wr(04.8_07.4)123137-Clip521_1.avi	wr	0.75	5.7	5
2464ys	male	y	8	.\clips\14.4 wr(14.1_14.6)085534-Clip1201_1.avi	wr	0.38	14.4	10
2464ys	male	y	8	.\clips\42.0 wr(41.7_42.3)133604-Clip349_1.avi	wr	0.75	42	35
2464ys	male	y	8	.\clips\57.5 nr(57.2_57.7)123137-Clip812_1.avi	nr	0.5	57.5	60
2464ys	male	y	8	.\clips\21.1 nr(20.3_21.9)100635-Clip1355_1.avi	nr	0.75	21.1	20
2464ys	male	y	8	.\clips\05.5 nr(04.5_06.5)150252-Clip1005_1.avi	nr	0.38	5.5	5
2464ys	male	y	8	.\clips\07.9 nr(05.9_09.2)110538-Clip209_1.avi	nr	0.75	7.9	5
2464ys	male	y	8	.\clips\17.9 wr(17.8_18.0)085534-Clip713_1.avi	wr	0.5	17.9	15
2464ys	male	y	8	.\clips\11.7 nr(11.2_11.8)105713-Clip158_1.avi	nr	0.75	11.7	5
2464ys	male	y	8	.\clips\08.2 nr(07.5_08.7)112540-Clip813_1.avi	nr	1	8.2	15
2464ys	male	y	8	.\clips\35.7 nr(35.4_35.9)085700-Clip171_1.avi	nr	0.5	35.7	30
2464ys	male	y	8	.\clips\24.1 wr(23.4_24.8)123137-Clip25_1.avi	wr	0.38	24.1	25
2464ys	male	y	8	.\clips\12.0 wr(11.6_12.9)083227-Clip770_1.avi	wr	0.75	12	10
2464ys	male	y	8	.\clips\57.0 wr(56.6_57.4)085534-Clip524_1.avi	wr	0.75	57	55
2464ys	male	y	8	.\clips\26.5 wr(26.3_26.7)083227-Clip576_1.avi	wr	0.38	26.5	35
2464ys	male	y	8	.\clips\05.4 nr(04.7_06.1)103635-Clip535_1.avi	nr	0.5	5.4	10
2464ys	male	y	8	.\clips\53.3 nr(53.1_53.8)150252-Clip1283_1.avi	nr	1	53.3	40
2464ys	male	y	8	.\clips\20.8 wr(20.1_21.5)085534-Clip586_1.avi	wr	0.38	20.8	20
2464ys	male	y	8	.\clips\60.4 nr(60.3_60.5)153252-Clip328_1.avi	nr	0.38	60.4	65
2464ys	male	y	8	.\clips\47.8 wr(47.0_48.9)083227-Clip611_1.avi	wr	0.5	47.8	45
2464ys	male	y	8	.\clips\37.4 wr(36.9_38.0)133604-Clip287_1.avi	wr	0.75	37.4	40
2464ys	male	y	8	.\clips\14.0 nr(12.1_15.5)132139-Clip189_1.avi	nr	1	14	15
2464ys	male	y	8	.\clips\55.4 nr(54.6_56.4)120137-Clip325_1.avi	nr	0.5	55.4	40
2464ys	male	y	8	.\clips\43.4 nr(43.3_43.5)132139-Clip575_1.avi	nr	1	43.4	40
2464ys	male	y	8	.\clips\21.6 nr(20.6_22.5)083227-Clip396_1.avi	nr	0.75	21.6	20
2464ys	male	y	8	.\clips\62.8 nr(62.7_62.8)150252-Clip1178_1.avi	nr	0.38	62.8	60
2464ys	male	y	8	.\clips\51.6 nr(50.8_52.2)150252-Clip1069_1.avi	nr	0.75	51.6	40
2464ys	male	y	8	.\clips\18.6 nr(18.1_19.2)110538-Clip1333_1.avi	nr	1	18.6	10
2464ys	male	y	8	.\clips\47.3 nr(46.2_47.9)120137-Clip305_1.avi	nr	0.5	47.3	40
2464ys	male	y	8	.\clips\41.7 wr(40.4_42.4)083227-Clip591_1.avi	wr	0.38	41.7	40
2464ys	male	y	8	.\clips\15.8 nr(15.4_16.3)085534-Clip67_1.avi	nr	0.38	15.8	20
2464ys	male	y	8	.\clips\28.6 wr(27.8_29.7)085534-Clip1683_1.avi	wr	1	28.6	25
2464ys	male	y	8	.\clips\38.6 nr(37.6_39.2)123137-Clip84_1.avi	nr	1	38.6	35
2464ys	male	y	8	.\clips\45.7 wr(44.8_46.5)133604-Clip692_1.avi	wr	0.5	45.7	55
2464ys	male	y	8	.\clips\58.4 wr(57.6_58.9)153252-Clip21_1.avi	wr	1	58.4	50
2464ys	male	y	8	.\clips\57.5 nr(57.1_58.0)120137-Clip335_1.avi	nr	0.75	57.5	50
2464ys	male	y	8	.\clips\18.5 wr(17.9_19.2)085534-Clip718_1.avi	wr	1	18.5	10
2464ys	male	y	8	.\clips\60.1 nr(60.0_60.2)153252-Clip333_1.avi	nr	0.5	60.1	50
2464ys	male	y	8	.\clips\38.2 nr(37.5_38.8)113538-Clip75_1.avi	nr	0.5	38.2	35
2464ys	male	y	8	.\clips\46.7 nr(45.7_47.5)123137-Clip913_1.avi	nr	0.38	46.7	45
2464ys	male	y	8	.\clips\37.1 nr(36.9_37.3)152855-Clip575_1.avi	nr	0.75	37.1	35
2464ys	male	y	8	.\clips\31.4 wr(30.9_32.1)085534-Clip1698_1.avi	wr	0.5	31.4	30
2464ys	male	y	8	.\clips\39.1 wr(38.8_39.7)152855-Clip768_1.avi	wr	0.38	39.1	40
2464ys	male	y	8	.\clips\22.9 nr(22.1_23.8)085700-Clip395_1.avi	nr	0.5	22.9	30
2464ys	male	y	8	.\clips\09.0 wr(08.9_09.3)123137-Clip416_1.avi	wr	0.38	9	8
2464ys	male	y	8	.\clips\05.5 wr(04.6_07.1)123137-Clip474_1.avi	wr	0.38	5.5	4
2464ys	male	y	8	.\clips\10.8 wr(09.9_11.8)083227-Clip1336_1.avi	wr	0.5	10.8	5
2464ys	male	y	8	.\clips\43.7 wr(42.8_44.2)133604-Clip344_1.avi	wr	0.5	43.7	45
2464ys	male	y	8	.\clips\12.3 wr(11.2_13.1)085534-Clip1099_1.avi	wr	0.5	12.3	12
2464ys	male	y	8	.\clips\48.8 wr(48.0_49.4)133604-Clip604_1.avi	wr	1	48.8	55
2464ys	male	y	8	.\clips\07.9 nr(07.0_08.8)143252-Clip406_1.avi	nr	0.5	7.9	15
2464ys	male	y	8	.\clips\54.1 nr(53.2_54.6)123137-Clip151_1.avi	nr	1	54.1	40
2464ys	male	y	8	.\clips\38.1 wr(38.0_38.3)152855-Clip798_1.avi	wr	1	38.1	35
2464ys	male	y	8	.\clips\29.2 wr(28.3_30.3)085534-Clip1693_1.avi	wr	1	29.2	25
2464ys	male	y	8	.\clips\42.5 nr(42.1_42.9)085534-Clip201_1.avi	nr	0.75	42.5	35
2464ys	male	y	8	.\clips\60.6 wr(60.4_60.7)083227-Clip649_1.avi	wr	0.38	60.6	60
2464ys	male	y	8	.\clips\19.2 nr(18.2_19.9)100635-Clip1360_1.avi	nr	1	19.2	10
2464ys	male	y	8	.\clips\62.1 nr(61.0_62.8)150252-Clip1173_1.avi	nr	0.5	62.1	50
2464ys	male	y	8	.\clips\37.3 wr(37.1_37.5)133604-Clip226_1.avi	wr	0.75	37.3	35
2464ys	male	y	8	.\clips\27.5 wr(26.6_28.5)152855-Clip1626_1.avi	wr	0.5	27.5	30
2464ys	male	y	8	.\clips\16.5 wr(16.4_16.6)091040-Clip846_1.avi	wr	0.75	16.5	15
2464ys	male	y	8	.\clips\50.5 wr(50.4_50.7)150252-Clip1099_1.avi	wr	0.38	50.5	50
2464ys	male	y	8	.\clips\31.5 wr(31.3_31.9)085534-Clip835_1.avi	wr	0.38	31.5	45
2464ys	male	y	8	.\clips\31.6 nr(30.6_32.5)135139-Clip51_1.avi	nr	0.75	31.6	30
2464ys	male	y	8	.\clips\50.8 wr(50.1_51.5)153252-Clip83_1.avi	wr	0.75	50.8	45
2464ys	male	y	8	.\clips\14.3 nr(13.7_15.0)085534-Clip62_1.avi	nr	0.38	14.3	15
2464ys	male	y	8	.\clips\47.2 nr(46.9_47.5)123137-Clip163_1.avi	nr	0.75	47.2	40
2464ys	male	y	8	.\clips\27.2 wr(26.2_27.9)085534-Clip976_1.avi	wr	0.75	27.2	25
2464ys	male	y	8	.\clips\64.4 wr(63.5_65.0)153252-Clip237_1.avi	wr	0.38	64.4	65
2464ys	male	y	8	.\clips\32.5 wr(32.3_32.6)085534-Clip840_1.avi	wr	0.75	32.5	30
2464ys	male	y	8	.\clips\54.3 nr(53.2_54.7)123137-Clip841_1.avi	nr	0.38	54.3	45
2464ys	male	y	8	.\clips\52.9 wr(52.8_53.0)133604-Clip632_1.avi	wr	1	52.9	35
2464ys	male	y	8	.\clips\44.6 wr(44.1_45.2)083227-Clip601_1.avi	wr	0.38	44.6	40
2464ys	male	y	8	.\clips\11.2 nr(09.7_12.8)083227-Clip345_1.avi	nr	0.38	11.2	10
2464ys	male	y	8	.\clips\07.2 wr(06.2_08.0)085534-Clip953_1.avi	wr	0.5	7.2	5
2464ys	male	y	8	.\clips\08.8 wr(07.6_10.5)083227-Clip1657_1.avi	wr	1	8.8	8
2464ys	male	y	8	.\clips\37.5 wr(36.8_38.3)152855-Clip1648_1.avi	wr	0.5	37.5	40
2464ys	male	y	8	.\clips\33.2 nr(32.9_33.5)112540-Clip1725_1.avi	nr	1	33.2	30
2464ys	male	y	8	.\clips\38.0 nr(37.3_39.0)135139-Clip366_1.avi	nr	0.75	38	40
2464ys	male	y	8	.\clips\16.8 nr(15.8_17.8)100635-Clip1253_1.avi	nr	0.75	16.8	20
2464ys	male	y	8	.\clips\56.6 wr(55.5_57.4)133604-Clip593_1.avi	wr	0.38	56.6	55
2464ys	male	y	8	.\clips\11.3 nr(10.7_12.6)150252-Clip979_1.avi	nr	0.75	11.3	10
2464ys	male	y	8	.\clips\13.8 nr(13.3_14.3)083227-Clip367_1.avi	nr	0.5	13.8	10
2464ys	male	y	8	.\clips\09.0 nr(09.0_09.1)100635-Clip169_1.avi	nr	1	9	5
2464ys	male	y	8	.\clips\36.0 nr(35.3_36.5)132139-Clip720_1.avi	nr	0.38	36	40
2464ys	male	y	8	.\clips\28.3 nr(27.8_29.3)100334-Clip236_1.avi	nr	1	28.3	30
2464ys	male	y	8	.\clips\50.3 nr(49.2_51.0)150252-Clip1226_1.avi	nr	0.5	50.3	28
2464ys	male	y	8	.\clips\22.4 wr(21.3_23.3)085534-Clip804_1.avi	wr	1	22.4	15
2464ys	male	y	8	.\clips\06.2 nr(05.7_07.5)132139-Clip249_1.avi	nr	0.75	6.2	5
2464ys	male	y	8	.\clips\62.1 nr(61.6_62.3)084019-Clip180_1.avi	nr	1	62.1	50
2464ys	male	y	8	.\clips\41.0 nr(40.9_41.2)085700-Clip949_1.avi	nr	0.38	41	45
2464ys	male	y	8	.\clips\16.3 nr(15.4_17.1)120137-Clip186_1.avi	nr	0.75	16.3	10
2464ys	male	y	8	.\clips\25.6 nr(25.4_25.9)085534-Clip315_1.avi	nr	0.38	25.6	20
2464ys	male	y	8	.\clips\19.1 wr(18.4_19.8)085534-Clip591_1.avi	wr	0.38	19.1	15
2464ys	male	y	8	.\clips\39.0 nr(38.9_39.2)135139-Clip341_1.avi	nr	1	39	35
2464ys	male	y	8	.\clips\56.0 nr(55.3_56.9)150252-Clip1298_1.avi	nr	0.38	56	40
2464ys	male	y	8	.\clips\06.5 wr(05.5_08.1)083227-Clip1674_1.avi	wr	0.75	6.5	5
2464ys	male	y	8	.\clips\12.9 wr(12.2_13.2)085534-Clip1211_1.avi	wr	1	12.9	10
2464ys	male	y	8	.\clips\41.9 nr(41.5_42.3)123137-Clip901_1.avi	nr	0.75	41.9	35
2464ys	male	y	8	.\clips\64.2 wr(63.1_64.8)153252-Clip211_1.avi	wr	1	64.2	50
2464ys	male	y	8	.\clips\21.8 wr(21.7_22.0)085534-Clip1048_1.avi	wr	1	21.8	30
2464ys	male	y	8	.\clips\49.5 nr(49.3_49.6)123137-Clip114_1.avi	nr	0.38	49.5	45
2464ys	male	y	8	.\clips\47.1 wr(46.3_48.0)081019-Clip258_1.avi	wr	0.75	47.1	45
2464ys	male	y	8	.\clips\39.4 nr(39.1_39.9)135139-Clip356_1.avi	nr	0.38	39.4	50
2464ys	male	y	8	.\clips\50.0 wr(49.4_51.1)084019-Clip273_1.avi	wr	0.5	50	40
2464ys	male	y	8	.\clips\21.2 wr(20.3_21.6)085534-Clip723_1.avi	wr	0.75	21.2	20
2464ys	male	y	8	.\clips\11.2 wr(10.4_11.8)083227-Clip1662_1.avi	wr	0.75	11.2	10
2464ys	male	y	8	.\clips\29.7 wr(29.4_30.0)152855-Clip1053_1.avi	wr	0.38	29.7	25
2464ys	male	y	8	.\clips\21.3 wr(21.2_21.5)085534-Clip728_1.avi	wr	0.5	21.3	25
2464ys	male	y	8	.\clips\46.7 nr(46.6_46.8)152855-Clip725_1.avi	nr	0.75	46.7	40
2464ys	male	y	8	.\clips\25.4 nr(25.1_25.8)085700-Clip82_1.avi	nr	0.5	25.4	20
2464ys	male	y	8	.\clips\51.5 wr(51.2_51.8)153252-Clip73_1.avi	wr	0.75	51.5	50
2464ys	male	y	8	.\clips\34.9 wr(33.9_35.9)132139-Clip1263_1.avi	wr	0.38	34.9	40
2464ys	male	y	8	.\clips\18.0 wr(17.9_18.1)085700-Clip1468_1.avi	wr	1	18	20
2464ys	male	y	8	.\clips\63.9 wr(62.9_64.5)100334-Clip596_1.avi	wr	1	63.9	50
2464ys	male	y	8	.\clips\09.5 nr(08.7_10.3)105713-Clip169_1.avi	nr	0.38	9.5	10
2464ys	male	y	8	.\clips\60.0 wr(58.9_60.7)083227-Clip644_1.avi	wr	0.5	60	55
2464ys	male	y	8	.\clips\32.3 nr(32.1_32.3)085534-Clip1305_1.avi	nr	0.5	32.3	15
2475ny	male	y	10	.\clips\50.8 wr(50.1_51.5)153252-Clip83_1.avi	wr	0.38	50.8	60
2475ny	male	y	10	.\clips\17.9 wr(17.8_18.0)085534-Clip713_1.avi	wr	0.5	17.9	20
2475ny	male	y	10	.\clips\39.0 nr(38.9_39.2)135139-Clip341_1.avi	nr	1	39	40
2475ny	male	y	10	.\clips\54.1 nr(53.2_54.6)123137-Clip151_1.avi	nr	1	54.1	45
2475ny	male	y	10	.\clips\05.4 nr(04.7_06.1)103635-Clip535_1.avi	nr	1	5.4	10
2475ny	male	y	10	.\clips\47.1 wr(46.3_48.0)081019-Clip258_1.avi	wr	0.5	47.1	40
2475ny	male	y	10	.\clips\52.2 wr(51.9_52.5)153252-Clip78_1.avi	wr	0.5	52.2	50
2475ny	male	y	10	.\clips\62.1 nr(61.0_62.8)150252-Clip1173_1.avi	nr	0.5	62.1	65
2475ny	male	y	10	.\clips\60.4 nr(60.3_60.5)153252-Clip328_1.avi	nr	0.75	60.4	65
2475ny	male	y	10	.\clips\51.6 nr(50.8_52.2)150252-Clip1069_1.avi	nr	0.38	51.6	65
2475ny	male	y	10	.\clips\45.9 nr(44.9_46.8)135139-Clip512_1.avi	nr	1	45.9	45
2475ny	male	y	10	.\clips\55.4 nr(54.6_56.4)120137-Clip325_1.avi	nr	1	55.4	35
2475ny	male	y	10	.\clips\56.0 nr(55.3_56.9)150252-Clip1298_1.avi	nr	0.75	56	35
2475ny	male	y	10	.\clips\10.9 wr(10.4_11.5)091040-Clip1582_1.avi	wr	0.75	10.9	10
2475ny	male	y	10	.\clips\37.1 nr(36.9_37.3)152855-Clip575_1.avi	nr	0.38	37.1	35
2475ny	male	y	10	.\clips\11.2 nr(09.7_12.8)083227-Clip345_1.avi	nr	0.75	11.2	5
2475ny	male	y	10	.\clips\27.2 wr(26.2_27.9)085534-Clip976_1.avi	wr	0.5	27.2	25
2475ny	male	y	10	.\clips\50.0 wr(49.4_51.1)084019-Clip273_1.avi	wr	1	50	55
2475ny	male	y	10	.\clips\60.9 nr(60.6_61.2)120137-Clip345_1.avi	nr	0.38	60.9	55
2475ny	male	y	10	.\clips\27.6 nr(27.1_28.1)085534-Clip325_1.avi	nr	0.5	27.6	30
2475ny	male	y	10	.\clips\62.7 nr(62.6_62.7)150252-Clip1183_1.avi	nr	1	62.7	60
2475ny	male	y	10	.\clips\52.7 nr(52.4_53.1)123137-Clip135_1.avi	nr	0.5	52.7	45
2475ny	male	y	10	.\clips\52.0 nr(51.7_52.3)123137-Clip130_1.avi	nr	0.5	52	50
2475ny	male	y	10	.\clips\14.3 nr(13.7_15.0)085534-Clip62_1.avi	nr	0.75	14.3	10
2475ny	male	y	10	.\clips\58.4 wr(57.6_58.9)153252-Clip21_1.avi	wr	0.38	58.4	60
2475ny	male	y	10	.\clips\59.7 wr(59.6_60.0)084019-Clip115_1.avi	wr	0.75	59.7	60
2475ny	male	y	10	.\clips\21.2 wr(20.3_21.6)085534-Clip723_1.avi	wr	0.5	21.2	25
2475ny	male	y	10	.\clips\38.7 wr(37.9_39.4)152855-Clip1643_1.avi	wr	1	38.7	45
2475ny	male	y	10	.\clips\59.3 nr(57.9_60.6)085700-Clip892_1.avi	nr	1	59.3	45
2475ny	male	y	10	.\clips\14.4 wr(14.1_14.6)085534-Clip1201_1.avi	wr	0.75	14.4	10
2475ny	male	y	10	.\clips\51.5 wr(51.2_51.8)153252-Clip73_1.avi	wr	0.5	51.5	57
2475ny	male	y	10	.\clips\35.7 nr(35.4_35.9)085700-Clip171_1.avi	nr	1	35.7	25
2475ny	male	y	10	.\clips\24.8 nr(23.6_26.0)085534-Clip1440_1.avi	nr	0.75	24.8	20
2475ny	male	y	10	.\clips\52.9 wr(52.8_53.0)133604-Clip632_1.avi	wr	0.38	52.9	50
2475ny	male	y	10	.\clips\38.1 wr(38.0_38.3)152855-Clip798_1.avi	wr	0.38	38.1	45
2475ny	male	y	10	.\clips\50.9 nr(49.8_51.5)123137-Clip125_1.avi	nr	0.75	50.9	45
2475ny	male	y	10	.\clips\06.5 wr(05.5_08.1)083227-Clip1674_1.avi	wr	0.5	6.5	7
2475ny	male	y	10	.\clips\26.7 wr(25.7_27.6)132139-Clip1506_1.avi	wr	0.38	26.7	30
2475ny	male	y	10	.\clips\54.8 wr(54.2_55.5)133604-Clip622_1.avi	wr	0.75	54.8	55
2475ny	male	y	10	.\clips\60.6 wr(60.4_60.7)083227-Clip649_1.avi	wr	0.75	60.6	60
2475ny	male	y	10	.\clips\28.6 wr(27.8_29.7)085534-Clip1683_1.avi	wr	0.38	28.6	30
2475ny	male	y	10	.\clips\11.3 nr(10.7_12.6)150252-Clip979_1.avi	nr	0.38	11.3	20
2475ny	male	y	10	.\clips\24.1 wr(23.4_24.8)123137-Clip25_1.avi	wr	0.75	24.1	20
2475ny	male	y	10	.\clips\34.8 wr(34.6_35.3)135139-Clip224_1.avi	wr	1	34.8	30
2475ny	male	y	10	.\clips\31.4 wr(30.9_32.1)085534-Clip1698_1.avi	wr	1	31.4	30
2475ny	male	y	10	.\clips\50.3 nr(49.2_51.0)150252-Clip1226_1.avi	nr	1	50.3	55
2475ny	male	y	10	.\clips\57.0 wr(56.6_57.4)085534-Clip524_1.avi	wr	0.5	57	65
2475ny	male	y	10	.\clips\19.1 wr(18.4_19.8)085534-Clip591_1.avi	wr	0.75	19.1	15
2475ny	male	y	10	.\clips\38.6 nr(37.6_39.2)123137-Clip84_1.avi	nr	0.38	38.6	45
2475ny	male	y	10	.\clips\27.5 wr(26.6_28.5)152855-Clip1626_1.avi	wr	0.5	27.5	45
2475ny	male	y	10	.\clips\13.6 wr(13.4_13.9)085534-Clip1206_1.avi	wr	1	13.6	10
2475ny	male	y	10	.\clips\05.7 wr(04.8_07.4)123137-Clip521_1.avi	wr	0.38	5.7	7
2475ny	male	y	10	.\clips\28.3 nr(27.8_29.3)100334-Clip236_1.avi	nr	0.38	28.3	30
2475ny	male	y	10	.\clips\44.8 nr(44.0_45.5)152855-Clip648_1.avi	nr	0.75	44.8	45
2475ny	male	y	10	.\clips\12.3 wr(11.2_13.1)085534-Clip1099_1.avi	wr	0.5	12.3	10
2475ny	male	y	10	.\clips\61.3 wr(60.9_62.3)100334-Clip590_1.avi	wr	0.38	61.3	65
2475ny	male	y	10	.\clips\23.5 nr(22.4_24.3)135139-Clip64_1.avi	nr	0.38	23.5	20
2475ny	male	y	10	.\clips\28.6 nr(27.5_29.1)100334-Clip125_1.avi	nr	1	28.6	20
2475ny	male	y	10	.\clips\57.3 nr(56.8_57.5)150252-Clip1157_1.avi	nr	0.38	57.3	60
2475ny	male	y	10	.\clips\15.7 wr(15.6_15.8)085700-Clip1447_1.avi	wr	1	15.7	10
2475ny	male	y	10	.\clips\29.5 nr(29.4_29.6)085534-Clip146_1.avi	nr	0.75	29.5	15
2475ny	male	y	10	.\clips\18.6 nr(18.1_19.2)110538-Clip1333_1.avi	nr	0.38	18.6	20
2475ny	male	y	10	.\clips\09.5 nr(08.7_10.3)105713-Clip169_1.avi	nr	0.75	9.5	10
2475ny	male	y	10	.\clips\54.3 nr(53.2_54.7)123137-Clip841_1.avi	nr	0.75	54.3	50
2475ny	male	y	10	.\clips\08.8 wr(07.6_10.5)083227-Clip1657_1.avi	wr	1	8.8	10
2475ny	male	y	10	.\clips\13.9 nr(13.1_14.6)105713-Clip1229_1.avi	nr	0.38	13.9	20
2475ny	male	y	10	.\clips\37.3 wr(37.1_37.5)133604-Clip226_1.avi	wr	0.38	37.3	45
2475ny	male	y	10	.\clips\08.2 nr(07.5_08.7)112540-Clip813_1.avi	nr	0.38	8.2	20
2475ny	male	y	10	.\clips\37.5 wr(36.8_38.3)152855-Clip1648_1.avi	wr	0.5	37.5	45
2475ny	male	y	10	.\clips\46.7 nr(45.7_47.5)123137-Clip913_1.avi	nr	0.75	46.7	50
2475ny	male	y	10	.\clips\12.9 wr(12.2_13.2)085534-Clip1211_1.avi	wr	0.38	12.9	10
2475ny	male	y	10	.\clips\62.8 nr(62.7_62.8)150252-Clip1178_1.avi	nr	0.75	62.8	65
2475ny	male	y	10	.\clips\64.4 wr(63.5_65.0)153252-Clip237_1.avi	wr	0.75	64.4	60
2475ny	male	y	10	.\clips\07.9 nr(05.9_09.2)110538-Clip209_1.avi	nr	0.5	7.9	7
2475ny	male	y	10	.\clips\08.4 wr(08.4_08.5)083227-Clip1722_1.avi	wr	0.38	8.4	10
2475ny	male	y	10	.\clips\49.5 nr(49.3_49.6)123137-Clip114_1.avi	nr	0.75	49.5	45
2475ny	male	y	10	.\clips\31.2 nr(30.4_31.4)135139-Clip74_1.avi	nr	0.38	31.2	40
2475ny	male	y	10	.\clips\26.6 nr(25.9_27.4)100334-Clip209_1.avi	nr	0.38	26.6	35
2475ny	male	y	10	.\clips\43.4 nr(43.3_43.5)132139-Clip575_1.avi	nr	0.38	43.4	45
2475ny	male	y	10	.\clips\05.3 wr(03.9_06.0)123137-Clip456_1.avi	wr	1	5.3	10
2475ny	male	y	10	.\clips\61.7 nr(61.4_62.0)120137-Clip350_1.avi	nr	0.5	61.7	45
2475ny	male	y	10	.\clips\14.0 nr(12.1_15.5)132139-Clip189_1.avi	nr	1	14	20
2475ny	male	y	10	.\clips\57.5 nr(57.1_58.0)120137-Clip335_1.avi	nr	0.5	57.5	50
2475ny	male	y	10	.\clips\34.9 nr(34.4_35.8)085700-Clip430_1.avi	nr	0.75	34.9	25
2475ny	male	y	10	.\clips\09.0 wr(08.9_09.3)123137-Clip416_1.avi	wr	0.75	9	10
2475ny	male	y	10	.\clips\46.7 wr(45.5_47.4)085534-Clip474_1.avi	wr	0.38	46.7	50
2475ny	male	y	10	.\clips\19.7 nr(19.5_19.9)120137-Clip224_1.avi	nr	0.75	19.7	15
2475ny	male	y	10	.\clips\44.6 wr(44.1_45.2)083227-Clip601_1.avi	wr	0.75	44.6	55
2475ny	male	y	10	.\clips\48.8 wr(48.0_49.4)133604-Clip604_1.avi	wr	1	48.8	55
2475ny	male	y	10	.\clips\38.0 nr(37.3_39.0)135139-Clip366_1.avi	nr	0.5	38	45
2475ny	male	y	10	.\clips\32.3 nr(32.1_32.3)085534-Clip1305_1.avi	nr	0.5	32.3	40
2475ny	male	y	10	.\clips\43.0 wr(42.9_43.1)133604-Clip702_1.avi	wr	0.5	43	50
2475ny	male	y	10	.\clips\32.1 wr(31.2_32.9)085534-Clip820_1.avi	wr	0.38	32.1	45
2475ny	male	y	10	.\clips\43.8 wr(43.1_44.3)133604-Clip697_1.avi	wr	0.38	43.8	60
2475ny	male	y	10	.\clips\31.6 nr(30.6_32.5)135139-Clip51_1.avi	nr	0.5	31.6	45
2475ny	male	y	10	.\clips\18.0 wr(17.9_18.1)085700-Clip1468_1.avi	wr	0.38	18	15
2475ny	male	y	10	.\clips\11.2 wr(10.4_11.8)083227-Clip1662_1.avi	wr	0.38	11.2	10
2475ny	male	y	10	.\clips\34.9 wr(33.9_35.9)132139-Clip1263_1.avi	wr	0.75	34.9	30
2475ny	male	y	10	.\clips\31.5 wr(31.3_31.9)085534-Clip835_1.avi	wr	0.75	31.5	25
2475ny	male	y	10	.\clips\22.9 nr(22.1_23.8)085700-Clip395_1.avi	nr	0.5	22.9	25
2475ny	male	y	10	.\clips\20.4 wr(19.4_20.9)083227-Clip835_1.avi	wr	1	20.4	10
2475ny	male	y	10	.\clips\50.5 wr(50.4_50.7)150252-Clip1099_1.avi	wr	0.75	50.5	45
2475ny	male	y	10	.\clips\40.5 nr(39.9_41.6)152855-Clip1773_1.avi	nr	1	40.5	45
2475ny	male	y	10	.\clips\53.3 nr(53.1_53.8)150252-Clip1283_1.avi	nr	0.38	53.3	55
2475ny	male	y	10	.\clips\21.1 wr(21.1_21.2)085534-Clip566_1.avi	wr	0.38	21.1	25
2475ny	male	y	10	.\clips\11.7 nr(11.2_11.8)105713-Clip158_1.avi	nr	0.5	11.7	10
2475ny	male	y	10	.\clips\12.0 wr(11.6_12.9)083227-Clip770_1.avi	wr	0.5	12	10
2475ny	male	y	10	.\clips\29.2 wr(28.3_30.3)085534-Clip1693_1.avi	wr	1	29.2	15
2475ny	male	y	10	.\clips\41.9 nr(41.5_42.3)123137-Clip901_1.avi	nr	0.38	41.9	45
2475ny	male	y	10	.\clips\23.9 nr(23.3_24.4)132139-Clip503_1.avi	nr	1	23.9	40
2475ny	male	y	10	.\clips\34.5 nr(34.2_35.2)085700-Clip425_1.avi	nr	1	34.5	35
2475ny	male	y	10	.\clips\63.2 wr(63.0_63.4)084019-Clip250_1.avi	wr	0.5	63.2	60
2475ny	male	y	10	.\clips\47.8 wr(47.0_48.9)083227-Clip611_1.avi	wr	0.5	47.8	50
2475ny	male	y	10	.\clips\57.5 nr(57.2_57.7)123137-Clip812_1.avi	nr	0.5	57.5	50
2475ny	male	y	10	.\clips\18.3 nr(17.1_19.5)105713-Clip1203_1.avi	nr	0.5	18.3	25
2475ny	male	y	10	.\clips\20.2 nr(19.4_21.3)110538-Clip1556_1.avi	nr	1	20.2	25
2475ny	male	y	10	.\clips\20.3 nr(19.9_21.3)091040-Clip98_1.avi	nr	0.75	20.3	30
2475ny	male	y	10	.\clips\39.4 nr(39.1_39.9)135139-Clip356_1.avi	nr	0.75	39.4	45
2475ny	male	y	10	.\clips\59.5 wr(59.3_59.8)083227-Clip695_1.avi	wr	1	59.5	50
2475ny	male	y	10	.\clips\16.8 nr(15.8_17.8)100635-Clip1253_1.avi	nr	0.5	16.8	30
2475ny	male	y	10	.\clips\63.9 wr(62.9_64.5)100334-Clip596_1.avi	wr	0.38	63.9	65
2475ny	male	y	10	.\clips\59.6 nr(58.6_60.4)120137-Clip340_1.avi	nr	0.75	59.6	50
2475ny	male	y	10	.\clips\26.5 wr(26.3_26.7)083227-Clip576_1.avi	wr	0.75	26.5	40
2475ny	male	y	10	.\clips\64.2 wr(63.1_64.8)153252-Clip211_1.avi	wr	1	64.2	50
2475ny	male	y	10	.\clips\21.3 wr(21.2_21.5)085534-Clip728_1.avi	wr	0.5	21.3	20
2475ny	male	y	10	.\clips\32.5 wr(32.3_32.6)085534-Clip840_1.avi	wr	0.5	32.5	25
2475ny	male	y	10	.\clips\35.5 wr(34.6_36.1)085534-Clip1586_1.avi	wr	1	35.5	25
2475ny	male	y	10	.\clips\21.1 nr(20.3_21.9)100635-Clip1355_1.avi	nr	0.38	21.1	25
2475ny	male	y	10	.\clips\36.0 nr(35.3_36.5)132139-Clip720_1.avi	nr	0.75	36	45
2475ny	male	y	10	.\clips\56.6 wr(55.5_57.4)133604-Clip593_1.avi	wr	0.75	56.6	55
2475ny	male	y	10	.\clips\46.2 wr(45.7_46.8)083227-Clip606_1.avi	wr	0.75	46.2	55
2475ny	male	y	10	.\clips\07.9 nr(07.0_08.8)143252-Clip406_1.avi	nr	0.5	7.9	15
2475ny	male	y	10	.\clips\62.1 nr(61.6_62.3)084019-Clip180_1.avi	nr	0.38	62.1	60
2475ny	male	y	10	.\clips\29.7 wr(29.4_30.0)152855-Clip1053_1.avi	wr	0.75	29.7	30
2475ny	male	y	10	.\clips\45.7 wr(44.8_46.5)133604-Clip692_1.avi	wr	1	45.7	50
2475ny	male	y	10	.\clips\16.7 wr(16.6_16.7)091040-Clip871_1.avi	wr	0.5	16.7	15
2475ny	male	y	10	.\clips\33.4 wr(32.8_34.4)132139-Clip1257_1.avi	wr	0.5	33.4	35
2475ny	male	y	10	.\clips\13.8 nr(13.3_14.3)083227-Clip367_1.avi	nr	0.5	13.8	15
2475ny	male	y	10	.\clips\15.8 nr(15.4_16.3)085534-Clip67_1.avi	nr	0.75	15.8	15
2475ny	male	y	10	.\clips\55.0 wr(54.9_55.2)085534-Clip514_1.avi	wr	1	55	55
2475ny	male	y	10	.\clips\43.1 nr(42.3_43.7)132139-Clip654_1.avi	nr	0.5	43.1	50
2475ny	male	y	10	.\clips\53.4 wr(53.1_53.7)133604-Clip637_1.avi	wr	1	53.4	50
2475ny	male	y	10	.\clips\62.5 wr(61.9_63.3)100334-Clip649_1.avi	wr	0.5	62.5	65
2475ny	male	y	10	.\clips\33.8 wr(32.9_34.6)132139-Clip1225_1.avi	wr	0.38	33.8	45
2475ny	male	y	10	.\clips\18.5 wr(17.9_19.2)085534-Clip718_1.avi	wr	1	18.5	15
2475ny	male	y	10	.\clips\38.2 nr(37.5_38.8)113538-Clip75_1.avi	nr	0.5	38.2	30
2475ny	male	y	10	.\clips\58.4 nr(58.0_58.9)123137-Clip817_1.avi	nr	0.38	58.4	50
2475ny	male	y	10	.\clips\37.4 wr(36.9_38.0)133604-Clip287_1.avi	wr	0.5	37.4	40
2475ny	male	y	10	.\clips\27.1 nr(26.4_28.2)085534-Clip330_1.avi	nr	0.5	27.1	30
2475ny	male	y	10	.\clips\19.2 nr(18.2_19.9)100635-Clip1360_1.avi	nr	1	19.2	20
2475ny	male	y	10	.\clips\48.3 nr(47.7_48.9)152855-Clip623_1.avi	nr	0.38	48.3	45
2475ny	male	y	10	.\clips\36.4 wr(35.8_37.4)152855-Clip1501_1.avi	wr	0.75	36.4	40
2475ny	male	y	10	.\clips\43.7 wr(42.8_44.2)133604-Clip344_1.avi	wr	0.5	43.7	45
2475ny	male	y	10	.\clips\16.5 wr(16.4_16.6)091040-Clip846_1.avi	wr	0.38	16.5	10
2475ny	male	y	10	.\clips\25.0 wr(23.9_25.8)085534-Clip809_1.avi	wr	1	25	10
2475ny	male	y	10	.\clips\21.6 nr(20.6_22.5)083227-Clip396_1.avi	nr	0.5	21.6	20
2475ny	male	y	10	.\clips\30.2 nr(29.6_31.2)171711-Clip306_1.avi	nr	1	30.2	25
2475ny	male	y	10	.\clips\49.1 wr(48.3_50.0)081019-Clip263_1.avi	wr	0.75	49.1	50
2475ny	male	y	10	.\clips\44.0 wr(42.9_44.5)121332-Clip257_1.avi	wr	1	44	50
2475ny	male	y	10	.\clips\46.7 nr(46.6_46.8)152855-Clip725_1.avi	nr	0.38	46.7	45
2475ny	male	y	10	.\clips\40.7 wr(40.2_41.0)152855-Clip763_1.avi	wr	1	40.7	40
2475ny	male	y	10	.\clips\48.5 wr(48.0_48.8)084019-Clip384_1.avi	wr	0.38	48.5	50
2475ny	male	y	10	.\clips\48.8 nr(47.1_49.7)123137-Clip252_1.avi	nr	1	48.8	45
2475ny	male	y	10	.\clips\47.3 nr(46.2_47.9)120137-Clip305_1.avi	nr	0.5	47.3	45
2475ny	male	y	10	.\clips\30.4 nr(29.3_31.2)100334-Clip182_1.avi	nr	0.75	30.4	30
2475ny	male	y	10	.\clips\22.4 wr(21.3_23.3)085534-Clip804_1.avi	wr	1	22.4	15
2475ny	male	y	10	.\clips\60.1 nr(60.0_60.2)153252-Clip333_1.avi	nr	1	60.1	50
2475ny	male	y	10	.\clips\15.3 nr(14.7_16.3)105713-Clip1198_1.avi	nr	1	15.3	20
2475ny	male	y	10	.\clips\05.5 nr(04.5_06.5)150252-Clip1005_1.avi	nr	0.75	5.5	10
2475ny	male	y	10	.\clips\05.5 wr(04.6_07.1)123137-Clip474_1.avi	wr	0.75	5.5	10
2475ny	male	y	10	.\clips\58.0 wr(57.6_58.3)121332-Clip284_1.avi	wr	0.5	58	45
2475ny	male	y	10	.\clips\10.8 wr(09.9_11.8)083227-Clip1336_1.avi	wr	1	10.8	10
2475ny	male	y	10	.\clips\20.8 wr(20.1_21.5)085534-Clip586_1.avi	wr	0.75	20.8	20
2475ny	male	y	10	.\clips\56.7 wr(55.7_57.3)153252-Clip16_1.avi	wr	0.38	56.7	60
2475ny	male	y	10	.\clips\33.2 nr(32.9_33.5)112540-Clip1725_1.avi	nr	0.38	33.2	35
2475ny	male	y	10	.\clips\09.0 nr(09.0_09.1)100635-Clip169_1.avi	nr	1	9	10
2475ny	male	y	10	.\clips\60.0 wr(58.9_60.7)083227-Clip644_1.avi	wr	1	60	50
2475ny	male	y	10	.\clips\42.5 nr(42.1_42.9)085534-Clip201_1.avi	nr	0.5	42.5	35
2475ny	male	y	10	.\clips\42.0 wr(41.7_42.3)133604-Clip349_1.avi	wr	0.38	42	45
2475ny	male	y	10	.\clips\41.7 wr(40.4_42.4)083227-Clip591_1.avi	wr	0.75	41.7	40
2475ny	male	y	10	.\clips\21.8 wr(21.7_22.0)085534-Clip1048_1.avi	wr	0.38	21.8	30
2475ny	male	y	10	.\clips\47.2 nr(46.9_47.5)123137-Clip163_1.avi	nr	0.5	47.2	45
2475ny	male	y	10	.\clips\43.6 nr(43.0_44.2)152855-Clip679_1.avi	nr	1	43.6	45
2475ny	male	y	10	.\clips\10.1 nr(09.2_11.6)152855-Clip352_1.avi	nr	1	10.1	10
2475ny	male	y	10	.\clips\07.2 wr(06.2_08.0)085534-Clip953_1.avi	wr	0.5	7.2	10
2475ny	male	y	10	.\clips\16.4 wr(15.7_17.4)083227-Clip887_1.avi	wr	0.75	16.4	10
2475ny	male	y	10	.\clips\25.6 nr(25.4_25.9)085534-Clip315_1.avi	nr	0.75	25.6	30
2475ny	male	y	10	.\clips\39.1 wr(38.8_39.7)152855-Clip768_1.avi	wr	0.75	39.1	40
2475ny	male	y	10	.\clips\41.0 nr(40.9_41.2)085700-Clip949_1.avi	nr	0.75	41	45
2475ny	male	y	10	.\clips\16.3 nr(15.4_17.1)120137-Clip186_1.avi	nr	0.38	16.3	15
2475ny	male	y	10	.\clips\25.4 nr(25.1_25.8)085700-Clip82_1.avi	nr	1	25.4	20
2475ny	male	y	10	.\clips\06.2 nr(05.7_07.5)132139-Clip249_1.avi	nr	0.38	6.2	10
2546oi	male	y	11	.\clips\15.7 wr(15.6_15.8)085700-Clip1447_1.avi	wr	0.75	15.7	15
2546oi	male	y	11	.\clips\05.3 wr(03.9_06.0)123137-Clip456_1.avi	wr	0.75	5.3	8
2546oi	male	y	11	.\clips\43.8 wr(43.1_44.3)133604-Clip697_1.avi	wr	0.5	43.8	55
2546oi	male	y	11	.\clips\11.3 nr(10.7_12.6)150252-Clip979_1.avi	nr	0.38	11.3	15
2546oi	male	y	11	.\clips\31.6 nr(30.6_32.5)135139-Clip51_1.avi	nr	0.5	31.6	30
2546oi	male	y	11	.\clips\54.3 nr(53.2_54.7)123137-Clip841_1.avi	nr	0.75	54.3	45
2546oi	male	y	11	.\clips\32.5 wr(32.3_32.6)085534-Clip840_1.avi	wr	0.5	32.5	35
2546oi	male	y	11	.\clips\09.5 nr(08.7_10.3)105713-Clip169_1.avi	nr	0.75	9.5	5
2546oi	male	y	11	.\clips\39.0 nr(38.9_39.2)135139-Clip341_1.avi	nr	0.38	39	35
2546oi	male	y	11	.\clips\07.9 nr(07.0_08.8)143252-Clip406_1.avi	nr	1	7.9	7
2546oi	male	y	11	.\clips\47.2 nr(46.9_47.5)123137-Clip163_1.avi	nr	0.5	47.2	35
2546oi	male	y	11	.\clips\26.7 wr(25.7_27.6)132139-Clip1506_1.avi	wr	0.38	26.7	27
2546oi	male	y	11	.\clips\16.4 wr(15.7_17.4)083227-Clip887_1.avi	wr	1	16.4	10
2546oi	male	y	11	.\clips\51.6 nr(50.8_52.2)150252-Clip1069_1.avi	nr	0.38	51.6	45
2546oi	male	y	11	.\clips\34.9 nr(34.4_35.8)085700-Clip430_1.avi	nr	0.75	34.9	23
2546oi	male	y	11	.\clips\20.8 wr(20.1_21.5)085534-Clip586_1.avi	wr	1	20.8	13
2546oi	male	y	11	.\clips\52.2 wr(51.9_52.5)153252-Clip78_1.avi	wr	1	52.2	52
2546oi	male	y	11	.\clips\38.0 nr(37.3_39.0)135139-Clip366_1.avi	nr	0.5	38	35
2546oi	male	y	11	.\clips\63.9 wr(62.9_64.5)100334-Clip596_1.avi	wr	0.5	63.9	58
2546oi	male	y	11	.\clips\25.0 wr(23.9_25.8)085534-Clip809_1.avi	wr	0.75	25	22
2546oi	male	y	11	.\clips\55.0 wr(54.9_55.2)085534-Clip514_1.avi	wr	0.75	55	50
2546oi	male	y	11	.\clips\64.2 wr(63.1_64.8)153252-Clip211_1.avi	wr	0.38	64.2	60
2546oi	male	y	11	.\clips\16.5 wr(16.4_16.6)091040-Clip846_1.avi	wr	0.38	16.5	25
2546oi	male	y	11	.\clips\59.6 nr(58.6_60.4)120137-Clip340_1.avi	nr	0.75	59.6	42
2546oi	male	y	11	.\clips\09.0 nr(09.0_09.1)100635-Clip169_1.avi	nr	0.38	9	7
2546oi	male	y	11	.\clips\14.3 nr(13.7_15.0)085534-Clip62_1.avi	nr	0.75	14.3	18
2546oi	male	y	11	.\clips\62.8 nr(62.7_62.8)150252-Clip1178_1.avi	nr	0.75	62.8	55
2546oi	male	y	11	.\clips\08.8 wr(07.6_10.5)083227-Clip1657_1.avi	wr	0.38	8.8	15
2546oi	male	y	11	.\clips\62.1 nr(61.0_62.8)150252-Clip1173_1.avi	nr	1	62.1	60
2546oi	male	y	11	.\clips\13.8 nr(13.3_14.3)083227-Clip367_1.avi	nr	1	13.8	15
2546oi	male	y	11	.\clips\60.4 nr(60.3_60.5)153252-Clip328_1.avi	nr	1	60.4	55
2546oi	male	y	11	.\clips\52.9 wr(52.8_53.0)133604-Clip632_1.avi	wr	0.5	52.9	55
2546oi	male	y	11	.\clips\32.1 wr(31.2_32.9)085534-Clip820_1.avi	wr	0.38	32.1	55
2546oi	male	y	11	.\clips\64.4 wr(63.5_65.0)153252-Clip237_1.avi	wr	0.75	64.4	62
2546oi	male	y	11	.\clips\26.5 wr(26.3_26.7)083227-Clip576_1.avi	wr	1	26.5	40
2546oi	male	y	11	.\clips\22.4 wr(21.3_23.3)085534-Clip804_1.avi	wr	0.38	22.4	38
2546oi	male	y	11	.\clips\48.8 wr(48.0_49.4)133604-Clip604_1.avi	wr	0.38	48.8	55
2546oi	male	y	11	.\clips\31.2 nr(30.4_31.4)135139-Clip74_1.avi	nr	0.38	31.2	32
2546oi	male	y	11	.\clips\28.3 nr(27.8_29.3)100334-Clip236_1.avi	nr	0.5	28.3	23
2546oi	male	y	11	.\clips\12.9 wr(12.2_13.2)085534-Clip1211_1.avi	wr	0.5	12.9	14
2546oi	male	y	11	.\clips\13.9 nr(13.1_14.6)105713-Clip1229_1.avi	nr	0.5	13.9	18
2546oi	male	y	11	.\clips\29.5 nr(29.4_29.6)085534-Clip146_1.avi	nr	0.75	29.5	23
2546oi	male	y	11	.\clips\46.7 nr(45.7_47.5)123137-Clip913_1.avi	nr	1	46.7	31
2546oi	male	y	11	.\clips\19.2 nr(18.2_19.9)100635-Clip1360_1.avi	nr	0.38	19.2	20
2546oi	male	y	11	.\clips\38.1 wr(38.0_38.3)152855-Clip798_1.avi	wr	0.5	38.1	50
2546oi	male	y	11	.\clips\44.0 wr(42.9_44.5)121332-Clip257_1.avi	wr	0.38	44	55
2546oi	male	y	11	.\clips\39.1 wr(38.8_39.7)152855-Clip768_1.avi	wr	0.75	39.1	50
2546oi	male	y	11	.\clips\55.4 nr(54.6_56.4)120137-Clip325_1.avi	nr	0.75	55.4	38
2546oi	male	y	11	.\clips\20.4 wr(19.4_20.9)083227-Clip835_1.avi	wr	0.75	20.4	17
2546oi	male	y	11	.\clips\58.4 nr(58.0_58.9)123137-Clip817_1.avi	nr	0.5	58.4	35
2546oi	male	y	11	.\clips\48.3 nr(47.7_48.9)152855-Clip623_1.avi	nr	0.5	48.3	35
2546oi	male	y	11	.\clips\48.5 wr(48.0_48.8)084019-Clip384_1.avi	wr	0.5	48.5	55
2546oi	male	y	11	.\clips\46.7 nr(46.6_46.8)152855-Clip725_1.avi	nr	0.38	46.7	37
2546oi	male	y	11	.\clips\33.8 wr(32.9_34.6)132139-Clip1225_1.avi	wr	0.5	33.8	33
2546oi	male	y	11	.\clips\63.2 wr(63.0_63.4)084019-Clip250_1.avi	wr	1	63.2	58
2546oi	male	y	11	.\clips\16.3 nr(15.4_17.1)120137-Clip186_1.avi	nr	0.38	16.3	20
2546oi	male	y	11	.\clips\52.0 nr(51.7_52.3)123137-Clip130_1.avi	nr	0.5	52	35
2546oi	male	y	11	.\clips\46.2 wr(45.7_46.8)083227-Clip606_1.avi	wr	1	46.2	50
2546oi	male	y	11	.\clips\08.2 nr(07.5_08.7)112540-Clip813_1.avi	nr	0.5	8.2	16
2546oi	male	y	11	.\clips\28.6 wr(27.8_29.7)085534-Clip1683_1.avi	wr	0.5	28.6	30
2546oi	male	y	11	.\clips\52.7 nr(52.4_53.1)123137-Clip135_1.avi	nr	1	52.7	35
2546oi	male	y	11	.\clips\27.1 nr(26.4_28.2)085534-Clip330_1.avi	nr	0.5	27.1	22
2546oi	male	y	11	.\clips\10.9 wr(10.4_11.5)091040-Clip1582_1.avi	wr	1	10.9	10
2546oi	male	y	11	.\clips\33.4 wr(32.8_34.4)132139-Clip1257_1.avi	wr	1	33.4	30
2546oi	male	y	11	.\clips\11.2 wr(10.4_11.8)083227-Clip1662_1.avi	wr	0.38	11.2	17
2546oi	male	y	11	.\clips\62.5 wr(61.9_63.3)100334-Clip649_1.avi	wr	0.5	62.5	60
2546oi	male	y	11	.\clips\57.3 nr(56.8_57.5)150252-Clip1157_1.avi	nr	0.38	57.3	50
2546oi	male	y	11	.\clips\15.8 nr(15.4_16.3)085534-Clip67_1.avi	nr	1	15.8	17
2546oi	male	y	11	.\clips\32.3 nr(32.1_32.3)085534-Clip1305_1.avi	nr	1	32.3	25
2546oi	male	y	11	.\clips\18.6 nr(18.1_19.2)110538-Clip1333_1.avi	nr	0.5	18.6	20
2546oi	male	y	11	.\clips\38.7 wr(37.9_39.4)152855-Clip1643_1.avi	wr	0.38	38.7	30
2546oi	male	y	11	.\clips\20.2 nr(19.4_21.3)110538-Clip1556_1.avi	nr	0.75	20.2	15
2546oi	male	y	11	.\clips\16.7 wr(16.6_16.7)091040-Clip871_1.avi	wr	0.5	16.7	20
2546oi	male	y	11	.\clips\53.3 nr(53.1_53.8)150252-Clip1283_1.avi	nr	0.5	53.3	35
2546oi	male	y	11	.\clips\15.3 nr(14.7_16.3)105713-Clip1198_1.avi	nr	0.75	15.3	18
2546oi	male	y	11	.\clips\30.4 nr(29.3_31.2)100334-Clip182_1.avi	nr	1	30.4	23
2546oi	male	y	11	.\clips\21.1 wr(21.1_21.2)085534-Clip566_1.avi	wr	0.38	21.1	20
2546oi	male	y	11	.\clips\60.0 wr(58.9_60.7)083227-Clip644_1.avi	wr	0.75	60	55
2546oi	male	y	11	.\clips\31.4 wr(30.9_32.1)085534-Clip1698_1.avi	wr	0.75	31.4	28
2546oi	male	y	11	.\clips\36.4 wr(35.8_37.4)152855-Clip1501_1.avi	wr	1	36.4	30
2546oi	male	y	11	.\clips\41.9 nr(41.5_42.3)123137-Clip901_1.avi	nr	0.38	41.9	30
2546oi	male	y	11	.\clips\10.8 wr(09.9_11.8)083227-Clip1336_1.avi	wr	0.75	10.8	10
2546oi	male	y	11	.\clips\53.4 wr(53.1_53.7)133604-Clip637_1.avi	wr	0.38	53.4	48
2546oi	male	y	11	.\clips\07.9 nr(05.9_09.2)110538-Clip209_1.avi	nr	0.5	7.9	7
2546oi	male	y	11	.\clips\31.5 wr(31.3_31.9)085534-Clip835_1.avi	wr	1	31.5	38
2546oi	male	y	11	.\clips\23.5 nr(22.4_24.3)135139-Clip64_1.avi	nr	0.5	23.5	23
2546oi	male	y	11	.\clips\09.0 wr(08.9_09.3)123137-Clip416_1.avi	wr	0.75	9	8
2546oi	male	y	11	.\clips\05.5 wr(04.6_07.1)123137-Clip474_1.avi	wr	1	5.5	7
2546oi	male	y	11	.\clips\08.4 wr(08.4_08.5)083227-Clip1722_1.avi	wr	0.5	8.4	10
2546oi	male	y	11	.\clips\10.1 nr(09.2_11.6)152855-Clip352_1.avi	nr	0.75	10.1	8
2546oi	male	y	11	.\clips\37.3 wr(37.1_37.5)133604-Clip226_1.avi	wr	0.38	37.3	37
2546oi	male	y	11	.\clips\05.5 nr(04.5_06.5)150252-Clip1005_1.avi	nr	1	5.5	7
2546oi	male	y	11	.\clips\30.2 nr(29.6_31.2)171711-Clip306_1.avi	nr	0.75	30.2	22
2546oi	male	y	11	.\clips\05.4 nr(04.7_06.1)103635-Clip535_1.avi	nr	0.75	5.4	10
2546oi	male	y	11	.\clips\24.8 nr(23.6_26.0)085534-Clip1440_1.avi	nr	0.75	24.8	27
2546oi	male	y	11	.\clips\48.8 nr(47.1_49.7)123137-Clip252_1.avi	nr	0.38	48.8	38
2546oi	male	y	11	.\clips\27.2 wr(26.2_27.9)085534-Clip976_1.avi	wr	0.5	27.2	35
2546oi	male	y	11	.\clips\23.9 nr(23.3_24.4)132139-Clip503_1.avi	nr	0.38	23.9	30
2546oi	male	y	11	.\clips\19.1 wr(18.4_19.8)085534-Clip591_1.avi	wr	0.75	19.1	20
2546oi	male	y	11	.\clips\43.7 wr(42.8_44.2)133604-Clip344_1.avi	wr	1	43.7	30
2546oi	male	y	11	.\clips\47.3 nr(46.2_47.9)120137-Clip305_1.avi	nr	1	47.3	30
2546oi	male	y	11	.\clips\25.6 nr(25.4_25.9)085534-Clip315_1.avi	nr	1	25.6	26
2546oi	male	y	11	.\clips\37.4 wr(36.9_38.0)133604-Clip287_1.avi	wr	0.5	37.4	30
2546oi	male	y	11	.\clips\06.2 nr(05.7_07.5)132139-Clip249_1.avi	nr	0.38	6.2	8
2546oi	male	y	11	.\clips\33.2 nr(32.9_33.5)112540-Clip1725_1.avi	nr	0.5	33.2	22
2546oi	male	y	11	.\clips\38.6 nr(37.6_39.2)123137-Clip84_1.avi	nr	0.5	38.6	35
2546oi	male	y	11	.\clips\42.0 wr(41.7_42.3)133604-Clip349_1.avi	wr	0.38	42	30
2546oi	male	y	11	.\clips\57.5 nr(57.1_58.0)120137-Clip335_1.avi	nr	0.5	57.5	36
2546oi	male	y	11	.\clips\21.2 wr(20.3_21.6)085534-Clip723_1.avi	wr	0.5	21.2	20
2546oi	male	y	11	.\clips\44.6 wr(44.1_45.2)083227-Clip601_1.avi	wr	0.75	44.6	45
2546oi	male	y	11	.\clips\62.7 nr(62.6_62.7)150252-Clip1183_1.avi	nr	0.38	62.7	45
2546oi	male	y	11	.\clips\56.0 nr(55.3_56.9)150252-Clip1298_1.avi	nr	1	56	36
2546oi	male	y	11	.\clips\22.9 nr(22.1_23.8)085700-Clip395_1.avi	nr	1	22.9	27
2546oi	male	y	11	.\clips\42.5 nr(42.1_42.9)085534-Clip201_1.avi	nr	0.5	42.5	28
2546oi	male	y	11	.\clips\49.5 nr(49.3_49.6)123137-Clip114_1.avi	nr	0.75	49.5	36
2546oi	male	y	11	.\clips\50.8 wr(50.1_51.5)153252-Clip83_1.avi	wr	0.38	50.8	58
2546oi	male	y	11	.\clips\44.8 nr(44.0_45.5)152855-Clip648_1.avi	nr	0.75	44.8	36
2546oi	male	y	11	.\clips\61.7 nr(61.4_62.0)120137-Clip350_1.avi	nr	0.5	61.7	35
2546oi	male	y	11	.\clips\07.2 wr(06.2_08.0)085534-Clip953_1.avi	wr	1	7.2	12
2546oi	male	y	11	.\clips\56.6 wr(55.5_57.4)133604-Clip593_1.avi	wr	1	56.6	50
2546oi	male	y	11	.\clips\57.5 nr(57.2_57.7)123137-Clip812_1.avi	nr	1	57.5	36
2546oi	male	y	11	.\clips\59.5 wr(59.3_59.8)083227-Clip695_1.avi	wr	0.38	59.5	50
2546oi	male	y	11	.\clips\19.7 nr(19.5_19.9)120137-Clip224_1.avi	nr	0.75	19.7	17
2546oi	male	y	11	.\clips\26.6 nr(25.9_27.4)100334-Clip209_1.avi	nr	0.38	26.6	22
2546oi	male	y	11	.\clips\50.0 wr(49.4_51.1)084019-Clip273_1.avi	wr	0.75	50	55
2546oi	male	y	11	.\clips\35.7 nr(35.4_35.9)085700-Clip171_1.avi	nr	0.75	35.7	25
2546oi	male	y	11	.\clips\58.0 wr(57.6_58.3)121332-Clip284_1.avi	wr	1	58	52
2546oi	male	y	11	.\clips\18.0 wr(17.9_18.1)085700-Clip1468_1.avi	wr	0.5	18	24
2546oi	male	y	11	.\clips\43.0 wr(42.9_43.1)133604-Clip702_1.avi	wr	0.5	43	42
2546oi	male	y	11	.\clips\37.5 wr(36.8_38.3)152855-Clip1648_1.avi	wr	1	37.5	31
2546oi	male	y	11	.\clips\14.0 nr(12.1_15.5)132139-Clip189_1.avi	nr	0.38	14	16
2546oi	male	y	11	.\clips\61.3 wr(60.9_62.3)100334-Clip590_1.avi	wr	0.38	61.3	58
2546oi	male	y	11	.\clips\50.9 nr(49.8_51.5)123137-Clip125_1.avi	nr	1	50.9	33
2546oi	male	y	11	.\clips\59.7 wr(59.6_60.0)084019-Clip115_1.avi	wr	0.75	59.7	60
2546oi	male	y	11	.\clips\47.1 wr(46.3_48.0)081019-Clip258_1.avi	wr	0.5	47.1	55
2546oi	male	y	11	.\clips\27.5 wr(26.6_28.5)152855-Clip1626_1.avi	wr	1	27.5	36
2546oi	male	y	11	.\clips\43.6 nr(43.0_44.2)152855-Clip679_1.avi	nr	0.38	43.6	34
2546oi	male	y	11	.\clips\50.5 wr(50.4_50.7)150252-Clip1099_1.avi	wr	1	50.5	45
2546oi	male	y	11	.\clips\46.7 wr(45.5_47.4)085534-Clip474_1.avi	wr	0.38	46.7	42
2546oi	male	y	11	.\clips\62.1 nr(61.6_62.3)084019-Clip180_1.avi	nr	0.5	62.1	55
2546oi	male	y	11	.\clips\45.9 nr(44.9_46.8)135139-Clip512_1.avi	nr	0.75	45.9	28
2546oi	male	y	11	.\clips\11.7 nr(11.2_11.8)105713-Clip158_1.avi	nr	0.5	11.7	7
2546oi	male	y	11	.\clips\49.1 wr(48.3_50.0)081019-Clip263_1.avi	wr	0.75	49.1	50
2546oi	male	y	11	.\clips\34.5 nr(34.2_35.2)085700-Clip425_1.avi	nr	0.38	34.5	30
2546oi	male	y	11	.\clips\13.6 wr(13.4_13.9)085534-Clip1206_1.avi	wr	0.38	13.6	18
2546oi	male	y	11	.\clips\37.1 nr(36.9_37.3)152855-Clip575_1.avi	nr	0.38	37.1	28
2546oi	male	y	11	.\clips\47.8 wr(47.0_48.9)083227-Clip611_1.avi	wr	1	47.8	46
2546oi	male	y	11	.\clips\50.3 nr(49.2_51.0)150252-Clip1226_1.avi	nr	0.75	50.3	41
2546oi	male	y	11	.\clips\21.1 nr(20.3_21.9)100635-Clip1355_1.avi	nr	0.38	21.1	20
2546oi	male	y	11	.\clips\35.5 wr(34.6_36.1)085534-Clip1586_1.avi	wr	0.75	35.5	20
2546oi	male	y	11	.\clips\11.2 nr(09.7_12.8)083227-Clip345_1.avi	nr	1	11.2	8
2546oi	male	y	11	.\clips\20.3 nr(19.9_21.3)091040-Clip98_1.avi	nr	1	20.3	16
2546oi	male	y	11	.\clips\21.3 wr(21.2_21.5)085534-Clip728_1.avi	wr	1	21.3	28
2546oi	male	y	11	.\clips\29.7 wr(29.4_30.0)152855-Clip1053_1.avi	wr	0.75	29.7	28
2546oi	male	y	11	.\clips\41.0 nr(40.9_41.2)085700-Clip949_1.avi	nr	1	41	30
2546oi	male	y	11	.\clips\54.1 nr(53.2_54.6)123137-Clip151_1.avi	nr	0.38	54.1	35
2546oi	male	y	11	.\clips\12.0 wr(11.6_12.9)083227-Clip770_1.avi	wr	0.5	12	15
2546oi	male	y	11	.\clips\12.3 wr(11.2_13.1)085534-Clip1099_1.avi	wr	1	12.3	15
2546oi	male	y	11	.\clips\21.6 nr(20.6_22.5)083227-Clip396_1.avi	nr	0.5	21.6	16
2546oi	male	y	11	.\clips\59.3 nr(57.9_60.6)085700-Clip892_1.avi	nr	0.38	59.3	40
2546oi	male	y	11	.\clips\41.7 wr(40.4_42.4)083227-Clip591_1.avi	wr	1	41.7	40
2546oi	male	y	11	.\clips\25.4 nr(25.1_25.8)085700-Clip82_1.avi	nr	0.75	25.4	19
2546oi	male	y	11	.\clips\29.2 wr(28.3_30.3)085534-Clip1693_1.avi	wr	0.38	29.2	20
2546oi	male	y	11	.\clips\51.5 wr(51.2_51.8)153252-Clip73_1.avi	wr	0.5	51.5	56
2546oi	male	y	11	.\clips\28.6 nr(27.5_29.1)100334-Clip125_1.avi	nr	0.38	28.6	18
2546oi	male	y	11	.\clips\06.5 wr(05.5_08.1)083227-Clip1674_1.avi	wr	0.5	6.5	10
2546oi	male	y	11	.\clips\17.9 wr(17.8_18.0)085534-Clip713_1.avi	wr	1	17.9	20
2546oi	male	y	11	.\clips\34.8 wr(34.6_35.3)135139-Clip224_1.avi	wr	0.38	34.8	29
2546oi	male	y	11	.\clips\57.0 wr(56.6_57.4)085534-Clip524_1.avi	wr	0.5	57	50
2546oi	male	y	11	.\clips\34.9 wr(33.9_35.9)132139-Clip1263_1.avi	wr	0.75	34.9	30
2546oi	male	y	11	.\clips\14.4 wr(14.1_14.6)085534-Clip1201_1.avi	wr	0.75	14.4	20
2546oi	male	y	11	.\clips\56.7 wr(55.7_57.3)153252-Clip16_1.avi	wr	0.38	56.7	57
2546oi	male	y	11	.\clips\24.1 wr(23.4_24.8)123137-Clip25_1.avi	wr	0.75	24.1	40
2546oi	male	y	11	.\clips\18.5 wr(17.9_19.2)085534-Clip718_1.avi	wr	0.38	18.5	30
2546oi	male	y	11	.\clips\05.7 wr(04.8_07.4)123137-Clip521_1.avi	wr	0.38	5.7	10
2546oi	male	y	11	.\clips\54.8 wr(54.2_55.5)133604-Clip622_1.avi	wr	0.75	54.8	47
2546oi	male	y	11	.\clips\21.8 wr(21.7_22.0)085534-Clip1048_1.avi	wr	0.5	21.8	20
2546oi	male	y	11	.\clips\45.7 wr(44.8_46.5)133604-Clip692_1.avi	wr	0.75	45.7	45
2546oi	male	y	11	.\clips\36.0 nr(35.3_36.5)132139-Clip720_1.avi	nr	1	36	32
2546oi	male	y	11	.\clips\27.6 nr(27.1_28.1)085534-Clip325_1.avi	nr	1	27.6	21
2546oi	male	y	11	.\clips\58.4 wr(57.6_58.9)153252-Clip21_1.avi	wr	0.5	58.4	57
2546oi	male	y	11	.\clips\18.3 nr(17.1_19.5)105713-Clip1203_1.avi	nr	1	18.3	15
2546oi	male	y	11	.\clips\60.1 nr(60.0_60.2)153252-Clip333_1.avi	nr	0.75	60.1	38
2546oi	male	y	11	.\clips\16.8 nr(15.8_17.8)100635-Clip1253_1.avi	nr	0.5	16.8	20
2546oi	male	y	11	.\clips\40.7 wr(40.2_41.0)152855-Clip763_1.avi	wr	0.75	40.7	37
2546oi	male	y	11	.\clips\60.6 wr(60.4_60.7)083227-Clip649_1.avi	wr	1	60.6	50
2546oi	male	y	11	.\clips\43.1 nr(42.3_43.7)132139-Clip654_1.avi	nr	1	43.1	36
2546oi	male	y	11	.\clips\40.5 nr(39.9_41.6)152855-Clip1773_1.avi	nr	0.75	40.5	30
2546oi	male	y	11	.\clips\39.4 nr(39.1_39.9)135139-Clip356_1.avi	nr	0.75	39.4	29
2546oi	male	y	11	.\clips\60.9 nr(60.6_61.2)120137-Clip345_1.avi	nr	0.38	60.9	36
2546oi	male	y	11	.\clips\38.2 nr(37.5_38.8)113538-Clip75_1.avi	nr	1	38.2	28
2546oi	male	y	11	.\clips\43.4 nr(43.3_43.5)132139-Clip575_1.avi	nr	0.5	43.4	32
2575ks	male	y	3	.\clips\38.1 wr(38.0_38.3)152855-Clip798_1.avi	wr	0.75	38.1	35
2575ks	male	y	3	.\clips\12.9 wr(12.2_13.2)085534-Clip1211_1.avi	wr	0.75	12.9	11
2575ks	male	y	3	.\clips\20.2 nr(19.4_21.3)110538-Clip1556_1.avi	nr	0.75	20.2	22
2575ks	male	y	3	.\clips\50.3 nr(49.2_51.0)150252-Clip1226_1.avi	nr	0.75	50.3	50
2575ks	male	y	3	.\clips\21.3 wr(21.2_21.5)085534-Clip728_1.avi	wr	1	21.3	15
2575ks	male	y	3	.\clips\30.4 nr(29.3_31.2)100334-Clip182_1.avi	nr	0.5	30.4	30
2575ks	male	y	3	.\clips\07.2 wr(06.2_08.0)085534-Clip953_1.avi	wr	1	7.2	10
2575ks	male	y	3	.\clips\09.0 nr(09.0_09.1)100635-Clip169_1.avi	nr	0.38	9	10
2575ks	male	y	3	.\clips\19.1 wr(18.4_19.8)085534-Clip591_1.avi	wr	0.38	19.1	12
2575ks	male	y	3	.\clips\26.5 wr(26.3_26.7)083227-Clip576_1.avi	wr	0.5	26.5	32
2575ks	male	y	3	.\clips\21.2 wr(20.3_21.6)085534-Clip723_1.avi	wr	1	21.2	11
2575ks	male	y	3	.\clips\48.8 wr(48.0_49.4)133604-Clip604_1.avi	wr	0.38	48.8	50
2575ks	male	y	3	.\clips\18.6 nr(18.1_19.2)110538-Clip1333_1.avi	nr	0.75	18.6	20
2575ks	male	y	3	.\clips\45.7 wr(44.8_46.5)133604-Clip692_1.avi	wr	0.75	45.7	57
2575ks	male	y	3	.\clips\51.6 nr(50.8_52.2)150252-Clip1069_1.avi	nr	0.5	51.6	60
2575ks	male	y	3	.\clips\09.0 wr(08.9_09.3)123137-Clip416_1.avi	wr	0.38	9	10
2575ks	male	y	3	.\clips\24.8 nr(23.6_26.0)085534-Clip1440_1.avi	nr	0.38	24.8	38
2575ks	male	y	3	.\clips\48.8 nr(47.1_49.7)123137-Clip252_1.avi	nr	0.38	48.8	45
2575ks	male	y	3	.\clips\29.5 nr(29.4_29.6)085534-Clip146_1.avi	nr	0.38	29.5	30
2575ks	male	y	3	.\clips\64.4 wr(63.5_65.0)153252-Clip237_1.avi	wr	0.38	64.4	60
2575ks	male	y	3	.\clips\32.1 wr(31.2_32.9)085534-Clip820_1.avi	wr	0.5	32.1	22
2575ks	male	y	3	.\clips\33.2 nr(32.9_33.5)112540-Clip1725_1.avi	nr	0.75	33.2	32
2575ks	male	y	3	.\clips\43.1 nr(42.3_43.7)132139-Clip654_1.avi	nr	1	43.1	40
2575ks	male	y	3	.\clips\21.1 nr(20.3_21.9)100635-Clip1355_1.avi	nr	0.5	21.1	25
2575ks	male	y	3	.\clips\41.9 nr(41.5_42.3)123137-Clip901_1.avi	nr	0.5	41.9	36
2575ks	male	y	3	.\clips\07.9 nr(07.0_08.8)143252-Clip406_1.avi	nr	1	7.9	10
2575ks	male	y	3	.\clips\05.3 wr(03.9_06.0)123137-Clip456_1.avi	wr	0.75	5.3	7
2575ks	male	y	3	.\clips\06.2 nr(05.7_07.5)132139-Clip249_1.avi	nr	0.5	6.2	8
2575ks	male	y	3	.\clips\25.0 wr(23.9_25.8)085534-Clip809_1.avi	wr	0.75	25	14
2575ks	male	y	3	.\clips\19.7 nr(19.5_19.9)120137-Clip224_1.avi	nr	0.38	19.7	15
2575ks	male	y	3	.\clips\09.5 nr(08.7_10.3)105713-Clip169_1.avi	nr	0.38	9.5	10
2575ks	male	y	3	.\clips\47.3 nr(46.2_47.9)120137-Clip305_1.avi	nr	1	47.3	52
2575ks	male	y	3	.\clips\55.4 nr(54.6_56.4)120137-Clip325_1.avi	nr	0.75	55.4	48
2575ks	male	y	3	.\clips\30.2 nr(29.6_31.2)171711-Clip306_1.avi	nr	0.75	30.2	37
2575ks	male	y	3	.\clips\58.4 nr(58.0_58.9)123137-Clip817_1.avi	nr	0.75	58.4	45
2575ks	male	y	3	.\clips\08.4 wr(08.4_08.5)083227-Clip1722_1.avi	wr	0.75	8.4	9
2575ks	male	y	3	.\clips\59.5 wr(59.3_59.8)083227-Clip695_1.avi	wr	0.38	59.5	45
2575ks	male	y	3	.\clips\18.3 nr(17.1_19.5)105713-Clip1203_1.avi	nr	1	18.3	20
2575ks	male	y	3	.\clips\48.5 wr(48.0_48.8)084019-Clip384_1.avi	wr	0.75	48.5	55
2575ks	male	y	3	.\clips\52.9 wr(52.8_53.0)133604-Clip632_1.avi	wr	0.75	52.9	50
2575ks	male	y	3	.\clips\46.7 wr(45.5_47.4)085534-Clip474_1.avi	wr	0.5	46.7	50
2575ks	male	y	3	.\clips\05.5 nr(04.5_06.5)150252-Clip1005_1.avi	nr	0.5	5.5	17
2575ks	male	y	3	.\clips\11.3 nr(10.7_12.6)150252-Clip979_1.avi	nr	0.5	11.3	17
2575ks	male	y	3	.\clips\34.9 nr(34.4_35.8)085700-Clip430_1.avi	nr	0.38	34.9	30
2575ks	male	y	3	.\clips\16.8 nr(15.8_17.8)100635-Clip1253_1.avi	nr	1	16.8	30
2575ks	male	y	3	.\clips\12.3 wr(11.2_13.1)085534-Clip1099_1.avi	wr	1	12.3	8
2575ks	male	y	3	.\clips\27.1 nr(26.4_28.2)085534-Clip330_1.avi	nr	1	27.1	27
2575ks	male	y	3	.\clips\27.6 nr(27.1_28.1)085534-Clip325_1.avi	nr	1	27.6	25
2575ks	male	y	3	.\clips\57.3 nr(56.8_57.5)150252-Clip1157_1.avi	nr	0.5	57.3	60
2575ks	male	y	3	.\clips\19.2 nr(18.2_19.9)100635-Clip1360_1.avi	nr	0.38	19.2	20
2575ks	male	y	3	.\clips\62.8 nr(62.7_62.8)150252-Clip1178_1.avi	nr	0.38	62.8	60
2575ks	male	y	3	.\clips\43.7 wr(42.8_44.2)133604-Clip344_1.avi	wr	1	43.7	50
2575ks	male	y	3	.\clips\59.7 wr(59.6_60.0)084019-Clip115_1.avi	wr	0.38	59.7	60
2575ks	male	y	3	.\clips\05.5 wr(04.6_07.1)123137-Clip474_1.avi	wr	0.5	5.5	10
2575ks	male	y	3	.\clips\59.3 nr(57.9_60.6)085700-Clip892_1.avi	nr	0.38	59.3	45
2575ks	male	y	3	.\clips\11.2 wr(10.4_11.8)083227-Clip1662_1.avi	wr	0.5	11.2	11
2575ks	male	y	3	.\clips\39.1 wr(38.8_39.7)152855-Clip768_1.avi	wr	0.38	39.1	45
2575ks	male	y	3	.\clips\05.7 wr(04.8_07.4)123137-Clip521_1.avi	wr	0.5	5.7	10
2575ks	male	y	3	.\clips\16.4 wr(15.7_17.4)083227-Clip887_1.avi	wr	0.5	16.4	15
2575ks	male	y	3	.\clips\21.1 wr(21.1_21.2)085534-Clip566_1.avi	wr	0.5	21.1	17
2575ks	male	y	3	.\clips\38.2 nr(37.5_38.8)113538-Clip75_1.avi	nr	1	38.2	30
2575ks	male	y	3	.\clips\60.9 nr(60.6_61.2)120137-Clip345_1.avi	nr	0.5	60.9	40
2575ks	male	y	3	.\clips\50.8 wr(50.1_51.5)153252-Clip83_1.avi	wr	0.5	50.8	42
2575ks	male	y	3	.\clips\62.1 nr(61.0_62.8)150252-Clip1173_1.avi	nr	1	62.1	60
2575ks	male	y	3	.\clips\26.7 wr(25.7_27.6)132139-Clip1506_1.avi	wr	0.5	26.7	39
2575ks	male	y	3	.\clips\43.0 wr(42.9_43.1)133604-Clip702_1.avi	wr	1	43	50
2575ks	male	y	3	.\clips\53.3 nr(53.1_53.8)150252-Clip1283_1.avi	nr	0.75	53.3	45
2575ks	male	y	3	.\clips\54.1 nr(53.2_54.6)123137-Clip151_1.avi	nr	0.38	54.1	50
2575ks	male	y	3	.\clips\51.5 wr(51.2_51.8)153252-Clip73_1.avi	wr	1	51.5	45
2575ks	male	y	3	.\clips\53.4 wr(53.1_53.7)133604-Clip637_1.avi	wr	0.38	53.4	50
2575ks	male	y	3	.\clips\15.8 nr(15.4_16.3)085534-Clip67_1.avi	nr	0.5	15.8	20
2575ks	male	y	3	.\clips\11.7 nr(11.2_11.8)105713-Clip158_1.avi	nr	1	11.7	12
2575ks	male	y	3	.\clips\10.8 wr(09.9_11.8)083227-Clip1336_1.avi	wr	0.75	10.8	10
2575ks	male	y	3	.\clips\42.5 nr(42.1_42.9)085534-Clip201_1.avi	nr	1	42.5	32
2575ks	male	y	3	.\clips\27.5 wr(26.6_28.5)152855-Clip1626_1.avi	wr	1	27.5	38
2575ks	male	y	3	.\clips\25.6 nr(25.4_25.9)085534-Clip315_1.avi	nr	0.5	25.6	30
2575ks	male	y	3	.\clips\33.4 wr(32.8_34.4)132139-Clip1257_1.avi	wr	1	33.4	30
2575ks	male	y	3	.\clips\16.5 wr(16.4_16.6)091040-Clip846_1.avi	wr	0.5	16.5	12
2575ks	male	y	3	.\clips\13.8 nr(13.3_14.3)083227-Clip367_1.avi	nr	1	13.8	15
2575ks	male	y	3	.\clips\44.0 wr(42.9_44.5)121332-Clip257_1.avi	wr	0.38	44	43
2575ks	male	y	3	.\clips\45.9 nr(44.9_46.8)135139-Clip512_1.avi	nr	0.75	45.9	47
2575ks	male	y	3	.\clips\46.2 wr(45.7_46.8)083227-Clip606_1.avi	wr	0.5	46.2	40
2575ks	male	y	3	.\clips\15.3 nr(14.7_16.3)105713-Clip1198_1.avi	nr	0.75	15.3	20
2575ks	male	y	3	.\clips\11.2 nr(09.7_12.8)083227-Clip345_1.avi	nr	0.5	11.2	10
2575ks	male	y	3	.\clips\23.9 nr(23.3_24.4)132139-Clip503_1.avi	nr	0.38	23.9	33
2575ks	male	y	3	.\clips\37.1 nr(36.9_37.3)152855-Clip575_1.avi	nr	0.5	37.1	40
2575ks	male	y	3	.\clips\56.7 wr(55.7_57.3)153252-Clip16_1.avi	wr	0.5	56.7	50
2575ks	male	y	3	.\clips\56.6 wr(55.5_57.4)133604-Clip593_1.avi	wr	0.5	56.6	60
2575ks	male	y	3	.\clips\40.7 wr(40.2_41.0)152855-Clip763_1.avi	wr	0.75	40.7	52
2575ks	male	y	3	.\clips\57.0 wr(56.6_57.4)085534-Clip524_1.avi	wr	1	57	41
2575ks	male	y	3	.\clips\39.0 nr(38.9_39.2)135139-Clip341_1.avi	nr	0.38	39	45
2575ks	male	y	3	.\clips\55.0 wr(54.9_55.2)085534-Clip514_1.avi	wr	0.75	55	44
2575ks	male	y	3	.\clips\05.4 nr(04.7_06.1)103635-Clip535_1.avi	nr	0.75	5.4	15
2575ks	male	y	3	.\clips\37.5 wr(36.8_38.3)152855-Clip1648_1.avi	wr	1	37.5	30
2575ks	male	y	3	.\clips\20.3 nr(19.9_21.3)091040-Clip98_1.avi	nr	0.5	20.3	22
2575ks	male	y	3	.\clips\48.3 nr(47.7_48.9)152855-Clip623_1.avi	nr	0.75	48.3	40
2575ks	male	y	3	.\clips\25.4 nr(25.1_25.8)085700-Clip82_1.avi	nr	0.75	25.4	21
2575ks	male	y	3	.\clips\18.5 wr(17.9_19.2)085534-Clip718_1.avi	wr	0.38	18.5	11
2575ks	male	y	3	.\clips\18.0 wr(17.9_18.1)085700-Clip1468_1.avi	wr	0.75	18	14
2575ks	male	y	3	.\clips\41.0 nr(40.9_41.2)085700-Clip949_1.avi	nr	0.5	41	35
2575ks	male	y	3	.\clips\21.6 nr(20.6_22.5)083227-Clip396_1.avi	nr	1	21.6	20
2575ks	male	y	3	.\clips\43.8 wr(43.1_44.3)133604-Clip697_1.avi	wr	0.75	43.8	55
2575ks	male	y	3	.\clips\42.0 wr(41.7_42.3)133604-Clip349_1.avi	wr	0.5	42	55
2575ks	male	y	3	.\clips\10.1 nr(09.2_11.6)152855-Clip352_1.avi	nr	0.75	10.1	20
2575ks	male	y	3	.\clips\60.4 nr(60.3_60.5)153252-Clip328_1.avi	nr	0.5	60.4	60
2575ks	male	y	3	.\clips\63.2 wr(63.0_63.4)084019-Clip250_1.avi	wr	1	63.2	58
2575ks	male	y	3	.\clips\35.7 nr(35.4_35.9)085700-Clip171_1.avi	nr	0.75	35.7	33
2575ks	male	y	3	.\clips\24.1 wr(23.4_24.8)123137-Clip25_1.avi	wr	0.38	24.1	30
2575ks	male	y	3	.\clips\50.5 wr(50.4_50.7)150252-Clip1099_1.avi	wr	0.5	50.5	40
2575ks	male	y	3	.\clips\36.4 wr(35.8_37.4)152855-Clip1501_1.avi	wr	0.5	36.4	31
2575ks	male	y	3	.\clips\46.7 nr(45.7_47.5)123137-Clip913_1.avi	nr	0.5	46.7	40
2575ks	male	y	3	.\clips\31.4 wr(30.9_32.1)085534-Clip1698_1.avi	wr	0.75	31.4	25
2575ks	male	y	3	.\clips\62.5 wr(61.9_63.3)100334-Clip649_1.avi	wr	1	62.5	40
2575ks	male	y	3	.\clips\40.5 nr(39.9_41.6)152855-Clip1773_1.avi	nr	0.75	40.5	45
2575ks	male	y	3	.\clips\38.0 nr(37.3_39.0)135139-Clip366_1.avi	nr	1	38	47
2575ks	male	y	3	.\clips\58.0 wr(57.6_58.3)121332-Clip284_1.avi	wr	1	58	50
2575ks	male	y	3	.\clips\50.9 nr(49.8_51.5)123137-Clip125_1.avi	nr	0.5	50.9	50
2575ks	male	y	3	.\clips\43.4 nr(43.3_43.5)132139-Clip575_1.avi	nr	0.75	43.4	45
2575ks	male	y	3	.\clips\49.5 nr(49.3_49.6)123137-Clip114_1.avi	nr	0.38	49.5	50
2575ks	male	y	3	.\clips\54.3 nr(53.2_54.7)123137-Clip841_1.avi	nr	0.38	54.3	55
2575ks	male	y	3	.\clips\50.0 wr(49.4_51.1)084019-Clip273_1.avi	wr	0.75	50	53
2575ks	male	y	3	.\clips\62.7 nr(62.6_62.7)150252-Clip1183_1.avi	nr	0.38	62.7	60
2575ks	male	y	3	.\clips\20.4 wr(19.4_20.9)083227-Clip835_1.avi	wr	0.75	20.4	15
2575ks	male	y	3	.\clips\63.9 wr(62.9_64.5)100334-Clip596_1.avi	wr	0.75	63.9	36
2575ks	male	y	3	.\clips\21.8 wr(21.7_22.0)085534-Clip1048_1.avi	wr	0.75	21.8	20
2575ks	male	y	3	.\clips\28.3 nr(27.8_29.3)100334-Clip236_1.avi	nr	0.75	28.3	25
2575ks	male	y	3	.\clips\12.0 wr(11.6_12.9)083227-Clip770_1.avi	wr	1	12	10
2575ks	male	y	3	.\clips\36.0 nr(35.3_36.5)132139-Clip720_1.avi	nr	0.5	36	42
2575ks	male	y	3	.\clips\28.6 nr(27.5_29.1)100334-Clip125_1.avi	nr	0.38	28.6	30
2575ks	male	y	3	.\clips\38.6 nr(37.6_39.2)123137-Clip84_1.avi	nr	0.75	38.6	40
2575ks	male	y	3	.\clips\07.9 nr(05.9_09.2)110538-Clip209_1.avi	nr	1	7.9	7
2575ks	male	y	3	.\clips\16.3 nr(15.4_17.1)120137-Clip186_1.avi	nr	0.5	16.3	10
2575ks	male	y	3	.\clips\62.1 nr(61.6_62.3)084019-Clip180_1.avi	nr	0.75	62.1	50
2575ks	male	y	3	.\clips\32.3 nr(32.1_32.3)085534-Clip1305_1.avi	nr	1	32.3	20
2575ks	male	y	3	.\clips\28.6 wr(27.8_29.7)085534-Clip1683_1.avi	wr	0.75	28.6	20
2575ks	male	y	3	.\clips\14.0 nr(12.1_15.5)132139-Clip189_1.avi	nr	0.38	14	20
2575ks	male	y	3	.\clips\14.4 wr(14.1_14.6)085534-Clip1201_1.avi	wr	0.38	14.4	12
2575ks	male	y	3	.\clips\10.9 wr(10.4_11.5)091040-Clip1582_1.avi	wr	0.5	10.9	9
2575ks	male	y	3	.\clips\17.9 wr(17.8_18.0)085534-Clip713_1.avi	wr	1	17.9	10
2575ks	male	y	3	.\clips\33.8 wr(32.9_34.6)132139-Clip1225_1.avi	wr	0.75	33.8	35
2575ks	male	y	3	.\clips\61.7 nr(61.4_62.0)120137-Clip350_1.avi	nr	1	61.7	40
2575ks	male	y	3	.\clips\43.6 nr(43.0_44.2)152855-Clip679_1.avi	nr	0.38	43.6	45
2575ks	male	y	3	.\clips\13.9 nr(13.1_14.6)105713-Clip1229_1.avi	nr	0.75	13.9	20
2575ks	male	y	3	.\clips\08.2 nr(07.5_08.7)112540-Clip813_1.avi	nr	0.75	8.2	20
2575ks	male	y	3	.\clips\22.4 wr(21.3_23.3)085534-Clip804_1.avi	wr	0.38	22.4	10
2575ks	male	y	3	.\clips\23.5 nr(22.4_24.3)135139-Clip64_1.avi	nr	0.75	23.5	17
2575ks	male	y	3	.\clips\60.0 wr(58.9_60.7)083227-Clip644_1.avi	wr	0.75	60	20
2575ks	male	y	3	.\clips\35.5 wr(34.6_36.1)085534-Clip1586_1.avi	wr	0.75	35.5	20
2575ks	male	y	3	.\clips\61.3 wr(60.9_62.3)100334-Clip590_1.avi	wr	0.5	61.3	40
2575ks	male	y	3	.\clips\37.3 wr(37.1_37.5)133604-Clip226_1.avi	wr	0.5	37.3	40
2575ks	male	y	3	.\clips\59.6 nr(58.6_60.4)120137-Clip340_1.avi	nr	0.38	59.6	45
2575ks	male	y	3	.\clips\46.7 nr(46.6_46.8)152855-Clip725_1.avi	nr	0.5	46.7	45
2575ks	male	y	3	.\clips\34.5 nr(34.2_35.2)085700-Clip425_1.avi	nr	0.38	34.5	40
2575ks	male	y	3	.\clips\31.5 wr(31.3_31.9)085534-Clip835_1.avi	wr	0.5	31.5	25
2575ks	male	y	3	.\clips\57.5 nr(57.2_57.7)123137-Clip812_1.avi	nr	1	57.5	40
2575ks	male	y	3	.\clips\29.7 wr(29.4_30.0)152855-Clip1053_1.avi	wr	0.38	29.7	26
2575ks	male	y	3	.\clips\32.5 wr(32.3_32.6)085534-Clip840_1.avi	wr	1	32.5	20
2575ks	male	y	3	.\clips\47.8 wr(47.0_48.9)083227-Clip611_1.avi	wr	1	47.8	20
2575ks	male	y	3	.\clips\58.4 wr(57.6_58.9)153252-Clip21_1.avi	wr	0.75	58.4	40
2575ks	male	y	3	.\clips\44.8 nr(44.0_45.5)152855-Clip648_1.avi	nr	0.38	44.8	45
2575ks	male	y	3	.\clips\52.7 nr(52.4_53.1)123137-Clip135_1.avi	nr	1	52.7	45
2575ks	male	y	3	.\clips\64.2 wr(63.1_64.8)153252-Clip211_1.avi	wr	0.38	64.2	40
2575ks	male	y	3	.\clips\52.0 nr(51.7_52.3)123137-Clip130_1.avi	nr	1	52	45
2575ks	male	y	3	.\clips\15.7 wr(15.6_15.8)085700-Clip1447_1.avi	wr	0.75	15.7	15
2575ks	male	y	3	.\clips\31.6 nr(30.6_32.5)135139-Clip51_1.avi	nr	1	31.6	25
2575ks	male	y	3	.\clips\38.7 wr(37.9_39.4)152855-Clip1643_1.avi	wr	0.38	38.7	25
2575ks	male	y	3	.\clips\26.6 nr(25.9_27.4)100334-Clip209_1.avi	nr	0.5	26.6	25
2575ks	male	y	3	.\clips\31.2 nr(30.4_31.4)135139-Clip74_1.avi	nr	0.5	31.2	27
2575ks	male	y	3	.\clips\22.9 nr(22.1_23.8)085700-Clip395_1.avi	nr	1	22.9	25
2575ks	male	y	3	.\clips\34.9 wr(33.9_35.9)132139-Clip1263_1.avi	wr	0.38	34.9	30
2575ks	male	y	3	.\clips\47.2 nr(46.9_47.5)123137-Clip163_1.avi	nr	1	47.2	35
2575ks	male	y	3	.\clips\49.1 wr(48.3_50.0)081019-Clip263_1.avi	wr	0.38	49.1	45
2575ks	male	y	3	.\clips\39.4 nr(39.1_39.9)135139-Clip356_1.avi	nr	0.38	39.4	45
2575ks	male	y	3	.\clips\29.2 wr(28.3_30.3)085534-Clip1693_1.avi	wr	0.38	29.2	20
2575ks	male	y	3	.\clips\57.5 nr(57.1_58.0)120137-Clip335_1.avi	nr	1	57.5	45
2575ks	male	y	3	.\clips\13.6 wr(13.4_13.9)085534-Clip1206_1.avi	wr	0.38	13.6	12
2575ks	male	y	3	.\clips\56.0 nr(55.3_56.9)150252-Clip1298_1.avi	nr	0.5	56	30
2575ks	male	y	3	.\clips\14.3 nr(13.7_15.0)085534-Clip62_1.avi	nr	0.38	14.3	20
2575ks	male	y	3	.\clips\54.8 wr(54.2_55.5)133604-Clip622_1.avi	wr	0.38	54.8	50
2575ks	male	y	3	.\clips\08.8 wr(07.6_10.5)083227-Clip1657_1.avi	wr	0.38	8.8	10
2575ks	male	y	3	.\clips\37.4 wr(36.9_38.0)133604-Clip287_1.avi	wr	1	37.4	35
2575ks	male	y	3	.\clips\47.1 wr(46.3_48.0)081019-Clip258_1.avi	wr	1	47.1	50
2575ks	male	y	3	.\clips\44.6 wr(44.1_45.2)083227-Clip601_1.avi	wr	0.38	44.6	40
2575ks	male	y	3	.\clips\60.1 nr(60.0_60.2)153252-Clip333_1.avi	nr	0.75	60.1	60
2575ks	male	y	3	.\clips\41.7 wr(40.4_42.4)083227-Clip591_1.avi	wr	0.5	41.7	35
2575ks	male	y	3	.\clips\20.8 wr(20.1_21.5)085534-Clip586_1.avi	wr	0.5	20.8	17
2575ks	male	y	3	.\clips\52.2 wr(51.9_52.5)153252-Clip78_1.avi	wr	1	52.2	45
2575ks	male	y	3	.\clips\34.8 wr(34.6_35.3)135139-Clip224_1.avi	wr	0.38	34.8	45
2575ks	male	y	3	.\clips\27.2 wr(26.2_27.9)085534-Clip976_1.avi	wr	1	27.2	20
2575ks	male	y	3	.\clips\06.5 wr(05.5_08.1)083227-Clip1674_1.avi	wr	1	6.5	10
2575ks	male	y	3	.\clips\60.6 wr(60.4_60.7)083227-Clip649_1.avi	wr	0.5	60.6	40
2575ks	male	y	3	.\clips\16.7 wr(16.6_16.7)091040-Clip871_1.avi	wr	1	16.7	25
2639ne	male	y	6	.\clips\38.1 wr(38.0_38.3)152855-Clip798_1.avi	wr	0.75	38.1	50
2639ne	male	y	6	.\clips\42.0 wr(41.7_42.3)133604-Clip349_1.avi	wr	0.38	42	40
2639ne	male	y	6	.\clips\21.6 nr(20.6_22.5)083227-Clip396_1.avi	nr	1	21.6	10
2639ne	male	y	6	.\clips\64.4 wr(63.5_65.0)153252-Clip237_1.avi	wr	0.38	64.4	60
2639ne	male	y	6	.\clips\43.7 wr(42.8_44.2)133604-Clip344_1.avi	wr	1	43.7	35
2639ne	male	y	6	.\clips\22.4 wr(21.3_23.3)085534-Clip804_1.avi	wr	0.5	22.4	20
2639ne	male	y	6	.\clips\44.0 wr(42.9_44.5)121332-Clip257_1.avi	wr	0.5	44	30
2639ne	male	y	6	.\clips\29.7 wr(29.4_30.0)152855-Clip1053_1.avi	wr	0.38	29.7	40
2639ne	male	y	6	.\clips\62.1 nr(61.6_62.3)084019-Clip180_1.avi	nr	0.75	62.1	60
2639ne	male	y	6	.\clips\36.4 wr(35.8_37.4)152855-Clip1501_1.avi	wr	0.5	36.4	40
2639ne	male	y	6	.\clips\49.5 nr(49.3_49.6)123137-Clip114_1.avi	nr	0.38	49.5	50
2639ne	male	y	6	.\clips\35.7 nr(35.4_35.9)085700-Clip171_1.avi	nr	0.75	35.7	35
2639ne	male	y	6	.\clips\28.6 nr(27.5_29.1)100334-Clip125_1.avi	nr	0.5	28.6	20
2639ne	male	y	6	.\clips\10.8 wr(09.9_11.8)083227-Clip1336_1.avi	wr	0.75	10.8	5
2639ne	male	y	6	.\clips\38.2 nr(37.5_38.8)113538-Clip75_1.avi	nr	1	38.2	25
2639ne	male	y	6	.\clips\37.4 wr(36.9_38.0)133604-Clip287_1.avi	wr	1	37.4	30
2639ne	male	y	6	.\clips\43.6 nr(43.0_44.2)152855-Clip679_1.avi	nr	0.5	43.6	45
2639ne	male	y	6	.\clips\29.2 wr(28.3_30.3)085534-Clip1693_1.avi	wr	0.5	29.2	25
2639ne	male	y	6	.\clips\48.8 wr(48.0_49.4)133604-Clip604_1.avi	wr	0.5	48.8	35
2639ne	male	y	6	.\clips\29.5 nr(29.4_29.6)085534-Clip146_1.avi	nr	0.38	29.5	25
2639ne	male	y	6	.\clips\27.2 wr(26.2_27.9)085534-Clip976_1.avi	wr	1	27.2	10
2639ne	male	y	6	.\clips\20.2 nr(19.4_21.3)110538-Clip1556_1.avi	nr	0.75	20.2	15
2639ne	male	y	6	.\clips\41.7 wr(40.4_42.4)083227-Clip591_1.avi	wr	0.5	41.7	25
2639ne	male	y	6	.\clips\43.4 nr(43.3_43.5)132139-Clip575_1.avi	nr	0.75	43.4	45
2639ne	male	y	6	.\clips\16.3 nr(15.4_17.1)120137-Clip186_1.avi	nr	0.38	16.3	15
2639ne	male	y	6	.\clips\37.5 wr(36.8_38.3)152855-Clip1648_1.avi	wr	1	37.5	45
2639ne	male	y	6	.\clips\12.3 wr(11.2_13.1)085534-Clip1099_1.avi	wr	1	12.3	10
2639ne	male	y	6	.\clips\57.3 nr(56.8_57.5)150252-Clip1157_1.avi	nr	0.38	57.3	50
2639ne	male	y	6	.\clips\64.2 wr(63.1_64.8)153252-Clip211_1.avi	wr	0.5	64.2	50
2639ne	male	y	6	.\clips\13.9 nr(13.1_14.6)105713-Clip1229_1.avi	nr	0.75	13.9	10
2639ne	male	y	6	.\clips\05.7 wr(04.8_07.4)123137-Clip521_1.avi	wr	0.38	5.7	5
2639ne	male	y	6	.\clips\60.1 nr(60.0_60.2)153252-Clip333_1.avi	nr	0.75	60.1	25
2639ne	male	y	6	.\clips\24.1 wr(23.4_24.8)123137-Clip25_1.avi	wr	0.38	24.1	25
2639ne	male	y	6	.\clips\23.9 nr(23.3_24.4)132139-Clip503_1.avi	nr	0.5	23.9	30
2639ne	male	y	6	.\clips\37.3 wr(37.1_37.5)133604-Clip226_1.avi	wr	0.38	37.3	25
2639ne	male	y	6	.\clips\10.9 wr(10.4_11.5)091040-Clip1582_1.avi	wr	0.5	10.9	15
2639ne	male	y	6	.\clips\61.7 nr(61.4_62.0)120137-Clip350_1.avi	nr	1	61.7	40
2639ne	male	y	6	.\clips\55.4 nr(54.6_56.4)120137-Clip325_1.avi	nr	0.75	55.4	50
2639ne	male	y	6	.\clips\62.5 wr(61.9_63.3)100334-Clip649_1.avi	wr	1	62.5	60
2639ne	male	y	6	.\clips\18.0 wr(17.9_18.1)085700-Clip1468_1.avi	wr	0.75	18	10
2639ne	male	y	6	.\clips\30.4 nr(29.3_31.2)100334-Clip182_1.avi	nr	0.5	30.4	20
2639ne	male	y	6	.\clips\57.5 nr(57.2_57.7)123137-Clip812_1.avi	nr	1	57.5	45
2639ne	male	y	6	.\clips\39.4 nr(39.1_39.9)135139-Clip356_1.avi	nr	0.38	39.4	40
2639ne	male	y	6	.\clips\18.5 wr(17.9_19.2)085534-Clip718_1.avi	wr	0.5	18.5	20
2639ne	male	y	6	.\clips\43.0 wr(42.9_43.1)133604-Clip702_1.avi	wr	1	43	34
2639ne	male	y	6	.\clips\47.1 wr(46.3_48.0)081019-Clip258_1.avi	wr	1	47.1	30
2639ne	male	y	6	.\clips\44.8 nr(44.0_45.5)152855-Clip648_1.avi	nr	0.38	44.8	40
2639ne	male	y	6	.\clips\05.4 nr(04.7_06.1)103635-Clip535_1.avi	nr	0.75	5.4	10
2639ne	male	y	6	.\clips\55.0 wr(54.9_55.2)085534-Clip514_1.avi	wr	0.75	55	35
2639ne	male	y	6	.\clips\35.5 wr(34.6_36.1)085534-Clip1586_1.avi	wr	0.75	35.5	25
2639ne	male	y	6	.\clips\13.8 nr(13.3_14.3)083227-Clip367_1.avi	nr	1	13.8	10
2639ne	male	y	6	.\clips\26.7 wr(25.7_27.6)132139-Clip1506_1.avi	wr	0.38	26.7	25
2639ne	male	y	6	.\clips\51.5 wr(51.2_51.8)153252-Clip73_1.avi	wr	1	51.5	35
2639ne	male	y	6	.\clips\07.9 nr(05.9_09.2)110538-Clip209_1.avi	nr	1	7.9	5
2639ne	male	y	6	.\clips\56.0 nr(55.3_56.9)150252-Clip1298_1.avi	nr	0.5	56	35
2639ne	male	y	6	.\clips\14.0 nr(12.1_15.5)132139-Clip189_1.avi	nr	0.5	14	10
2639ne	male	y	6	.\clips\06.5 wr(05.5_08.1)083227-Clip1674_1.avi	wr	1	6.5	5
2639ne	male	y	6	.\clips\47.2 nr(46.9_47.5)123137-Clip163_1.avi	nr	1	47.2	25
2639ne	male	y	6	.\clips\46.2 wr(45.7_46.8)083227-Clip606_1.avi	wr	0.5	46.2	40
2639ne	male	y	6	.\clips\09.5 nr(08.7_10.3)105713-Clip169_1.avi	nr	0.38	9.5	10
2639ne	male	y	6	.\clips\15.7 wr(15.6_15.8)085700-Clip1447_1.avi	wr	0.75	15.7	15
2639ne	male	y	6	.\clips\45.9 nr(44.9_46.8)135139-Clip512_1.avi	nr	0.75	45.9	30
2639ne	male	y	6	.\clips\25.4 nr(25.1_25.8)085700-Clip82_1.avi	nr	0.75	25.4	25
2639ne	male	y	6	.\clips\50.3 nr(49.2_51.0)150252-Clip1226_1.avi	nr	0.75	50.3	40
2639ne	male	y	6	.\clips\32.1 wr(31.2_32.9)085534-Clip820_1.avi	wr	0.38	32.1	20
2639ne	male	y	6	.\clips\52.9 wr(52.8_53.0)133604-Clip632_1.avi	wr	0.75	52.9	35
2639ne	male	y	6	.\clips\20.8 wr(20.1_21.5)085534-Clip586_1.avi	wr	0.5	20.8	15
2639ne	male	y	6	.\clips\06.2 nr(05.7_07.5)132139-Clip249_1.avi	nr	0.38	6.2	5
2639ne	male	y	6	.\clips\43.8 wr(43.1_44.3)133604-Clip697_1.avi	wr	0.75	43.8	60
2639ne	male	y	6	.\clips\31.5 wr(31.3_31.9)085534-Clip835_1.avi	wr	0.5	31.5	28
2639ne	male	y	6	.\clips\38.6 nr(37.6_39.2)123137-Clip84_1.avi	nr	0.75	38.6	36
2639ne	male	y	6	.\clips\52.2 wr(51.9_52.5)153252-Clip78_1.avi	wr	1	52.2	40
2639ne	male	y	6	.\clips\33.4 wr(32.8_34.4)132139-Clip1257_1.avi	wr	1	33.4	45
2639ne	male	y	6	.\clips\30.2 nr(29.6_31.2)171711-Clip306_1.avi	nr	0.75	30.2	20
2639ne	male	y	6	.\clips\63.9 wr(62.9_64.5)100334-Clip596_1.avi	wr	0.75	63.9	32
2639ne	male	y	6	.\clips\34.8 wr(34.6_35.3)135139-Clip224_1.avi	wr	0.5	34.8	35
2639ne	male	y	6	.\clips\50.9 nr(49.8_51.5)123137-Clip125_1.avi	nr	0.5	50.9	30
2639ne	male	y	6	.\clips\27.5 wr(26.6_28.5)152855-Clip1626_1.avi	wr	1	27.5	22
2639ne	male	y	6	.\clips\05.5 wr(04.6_07.1)123137-Clip474_1.avi	wr	0.5	5.5	4
[truncated: 3,761 more rows]

## Sheet: Sheet2
subject id	gender	Driving_experience	Driving_years
0043er	female	y	52
0162le	male	y	65
1068go	male	y	8
1875dt	male	y	20
2025es	female	n	0
2030nr	female	y	46
2464ys	male	y	8
2475ny	male	y	10
2546oi	male	y	11
2575ks	male	y	3
2639ne	male	y	6
2654fl	male	y	7
2665ng	male	y	2
2721gu	male	y	1
2730ig	female	n	0
2731lt	male	y	8
2732ns	male	n	0
2737go	female	y	3
2738en	male	n	0
2739ar	female	n	0
2740is	male	y	54
2745ae	female	n	0
2746ui	female	y	1
2747ia	female	n	0
2752ma	male	n	0
2755an	female	n	0
2756ng	male	n	0
2757gu	female	n	0
2758oo	female	n	0
2760no	female	n	0
